# Supplementary material for: Biologically Active Metabolites from the Marine Sediment-Derived Fungus Aspergillus flocculosus
Source: PubMed Central journal article supplement (PMC6835654; doi:10.3390/md17100579), 2019-10-11

## Supplementary data

# Biologically Active Metabolites from the Marine Sediment-Derived Fungus *Aspergillus flocculosus*

Anton N. Yurchenko <sup>1,\*</sup>, Phan Thi Hoai Trinh <sup>2</sup>, Elena V. Ivanets <sup>1</sup>, Olga F. Smetanina <sup>1</sup>, Anton B. Rasin <sup>1</sup>, Roman S. Popov <sup>1</sup>, Sergey A. Dyshlovoy <sup>1,3,4,5</sup>, Gunhild von Amsberg <sup>4,5</sup>, Ekaterina S. Menchinskaya <sup>1</sup>, Tran Thi Thanh Van <sup>2</sup> and Shamil Sh. Afiyatulloev <sup>1</sup>

<sup>1</sup> G.B. Elyakov Pacific Institute of Bioorganic Chemistry, Far Eastern Branch of the Russian Academy of Sciences, Prospect 100-letiya Vladivostoka, 159, Vladivostok 690022, Russia;

ev.ivanets@yandex.ru (E.V.I.), smetof@rambler.ru (O.F.S.); abrus\_54@mail.ru (A.B.R.); prs\_90@mail.ru (R.S.P.); dyshlovoy@gmail.com (S.A.D.); ekaterinamenchinskaya@gmail.com (E.S.M.); afiyat@piboc.dvo.ru (S.S.A.)

<sup>2</sup> Department of Marine Biotechnology, Nhatrang Institute of Technology Research and Application, Vietnam Academy of Science and Technology, Nha Trang, Vietnam; [phanhoaitrinh84@gmail.com](mailto:phanhoaitrinh84@gmail.com) (P.T.H.T.); [tranthanhvan@nitra.vast.vn](mailto:tranthanhvan@nitra.vast.vn) (T.T.T.V.)

<sup>3</sup> School of Natural Science, Far Eastern Federal University, Sukhanova St., 8, Vladivostok 690000, Russia

<sup>4</sup> Laboratory of Experimental Oncology, Department of Oncology, Hematology and Bone Marrow Transplantation with Section Pneumology, Hubertus Wald-Tumorzentrum, University Medical Center Hamburg-Eppendorf, 20246 Hamburg, Germany; [g.von-amsberg@uke.de](mailto:g.von-amsberg@uke.de) (G.A.)

<sup>5</sup> Martini-Klinik Prostate Cancer Center, University Hospital Hamburg-Eppendorf, Hamburg, Germany

\* Correspondence: [yurchant@ya.ru](mailto:yurchant@ya.ru); Tel.: +7-423-231-1168

## Content

|                                                                                                                                             |    |
|---------------------------------------------------------------------------------------------------------------------------------------------|----|
| <b>Figure S1.</b> <sup>1</sup> H NMR (500 MHz, CDCl <sub>3</sub> ) spectrum of aspilactonol F (1) .....                                     | 4  |
| <b>Figure S2.</b> <sup>13</sup> C NMR (125 MHz, CDCl <sub>3</sub> ) spectrum of aspilactonol F (1) .....                                    | 5  |
| <b>Figure S3.</b> DEPT-135 (125 MHz, CDCl <sub>3</sub> ) spectrum of aspilactonol F (1) .....                                               | 6  |
| <b>Figure S4.</b> <sup>1</sup> H- <sup>1</sup> H COSY (500 MHz, CDCl <sub>3</sub> ) spectrum of aspilactonol F (1) .....                    | 7  |
| <b>Figure S5.</b> HSQC (500 MHz, CDCl <sub>3</sub> ) spectrum of aspilactonol F (1) .....                                                   | 8  |
| <b>Figure S6.</b> HMBC (500 MHz, CDCl <sub>3</sub> ) spectrum of aspilactonol F (1) .....                                                   | 9  |
| <b>Figure S7.</b> ROESY (500 MHz, CDCl <sub>3</sub> ) spectrum of aspilactonol F (1).....                                                   | 10 |
| <b>Figure S8.</b> ECD spectrum of aspilactonol F (1) in methanol .....                                                                      | 11 |
| <b>Figure S9.</b> <sup>1</sup> H NMR (500 MHz, CDCl <sub>3</sub> ) spectrum of aspilactonol G (2).....                                      | 12 |
| <b>Figure S10.</b> <sup>13</sup> C NMR (125 MHz, CDCl <sub>3</sub> ) spectrum of aspilactonol G (2).....                                    | 13 |
| <b>Figure S11.</b> DEPT-135 (125 MHz, CDCl <sub>3</sub> ) spectrum of aspilactonol G (2).....                                               | 14 |
| <b>Figure S12.</b> <sup>1</sup> H NMR (700 MHz, acetone-d <sub>6</sub> ) spectrum of aspilactonol G (2).....                                | 15 |
| <b>Figure S13.</b> <sup>13</sup> C NMR (125 MHz, acetone-d <sub>6</sub> ) spectrum of aspilactonol G (2).....                               | 16 |
| <b>Figure S14.</b> <sup>1</sup> H- <sup>1</sup> H COSY (700 MHz, acetone-d <sub>6</sub> ) spectrum of aspilactonol G (2).....               | 17 |
| <b>Figure S15.</b> HSQC (700 MHz, acetone-d <sub>6</sub> ) spectrum of aspilactonol G (2) .....                                             | 18 |
| <b>Figure S16.</b> HMBC (700 MHz, acetone-d <sub>6</sub> ) spectrum of aspilactonol G (2) .....                                             | 19 |
| <b>Figure S17.</b> ECD spectrum of aspilactonol G (2) in methanol.....                                                                      | 20 |
| <b>Figure S18.</b> <sup>1</sup> H NMR (500 MHz, CDCl <sub>3</sub> ) spectrum of dihydroaspirone (3) .....                                   | 21 |
| <b>Figure S19.</b> <sup>13</sup> C NMR (176 MHz, CDCl <sub>3</sub> ) spectrum of dihydroaspirone (3).....                                   | 22 |
| <b>Figure S20.</b> <sup>1</sup> H NMR (500 MHz, CDCl <sub>3</sub> ) spectrum of 12- <i>epi</i> -aspartetranone D (4) .....                  | 23 |
| <b>Figure S21.</b> <sup>13</sup> C NMR (176 MHz, CDCl <sub>3</sub> ) spectrum of 12- <i>epi</i> -aspartetranone D (4) .....                 | 25 |
| <b>Figure S22.</b> DEPT-135 (500 MHz, CDCl <sub>3</sub> ) spectrum of 12- <i>epi</i> -aspartetranone D (4) .....                            | 26 |
| <b>Figure S23.</b> <sup>1</sup> H- <sup>1</sup> H COSY (500 MHz, CDCl <sub>3</sub> ) spectrum of 12- <i>epi</i> -aspartetranone D (4) ..... | 27 |
| <b>Figure S24.</b> HSQC (500 MHz, CDCl <sub>3</sub> ) spectrum of 12- <i>epi</i> -aspartetranone D (4).....                                 | 28 |
| <b>Figure S25.</b> HMBC (500 MHz, CDCl <sub>3</sub> ) spectrum of 12- <i>epi</i> -aspartetranone D (4).....                                 | 29 |
| <b>Figure S26.</b> ROESY (500 MHz, CDCl <sub>3</sub> ) spectrum of 12- <i>epi</i> -aspartetranone D (4).....                                | 30 |
| <b>Figure S27.</b> ECD spectrum of 12- <i>epi</i> -aspartetranone D (4) in methanol .....                                                   | 31 |
| <b>Figure S28.</b> <sup>1</sup> H NMR (500 MHz, CDCl <sub>3</sub> ) spectrum of aspartetranone D (5).....                                   | 32 |
| <b>Figure S29.</b> <sup>13</sup> C NMR (176 MHz, CDCl <sub>3</sub> ) spectrum of aspartetranone D (5).....                                  | 33 |
| <b>Figure S30.</b> <sup>1</sup> H NMR (500 MHz, acetone-d <sub>6</sub> ) spectrum of aspartetranone A (6).....                              | 34 |
| <b>Figure S31.</b> <sup>13</sup> C NMR (125 MHz, acetone-d <sub>6</sub> ) spectrum of aspartetranone A (6).....                             | 35 |
| <b>Figure S32.</b> DEPT-135 (125 MHz, acetone-d <sub>6</sub> ) spectrum of aspartetranone A (6).....                                        | 36 |
| <b>Figure S33.</b> <sup>1</sup> H NMR (500 MHz, CDCl <sub>3</sub> ) spectrum of 6β,9α,14-trihydroxycinnamolide (7).....                     | 37 |
| <b>Figure S34.</b> <sup>13</sup> C NMR (500 MHz, CDCl <sub>3</sub> ) spectrum of 6β,9α,14-trihydroxycinnamolide (7).....                    | 38 |
| <b>Figure S35.</b> DEPT-135 (500 MHz, CDCl <sub>3</sub> ) spectrum of 6β,9α,14-trihydroxycinnamolide (7).....                               | 39 |

|                                                                                                                                                            |    |
|------------------------------------------------------------------------------------------------------------------------------------------------------------|----|
| <b>Figure S36.</b> $^1\text{H}$ - $^1\text{H}$ COSY (500 MHz, $\text{CDCl}_3$ ) spectrum of $6\beta,9\alpha,14$ -trihydroxycinnamolide ( <b>7</b> )        | 40 |
| <b>Figure S37.</b> HSQC (500 MHz, $\text{CDCl}_3$ ) spectrum of $6\beta,9\alpha,14$ -trihydroxycinnamolide ( <b>7</b> )                                    | 41 |
| <b>Figure S38.</b> HMBC (500 MHz, $\text{CDCl}_3$ ) spectrum of $6\beta,9\alpha,14$ -trihydroxycinnamolide ( <b>7</b> )                                    | 42 |
| <b>Figure S39.</b> ROESY (500 MHz, $\text{CDCl}_3$ ) spectrum of $6\beta,9\alpha,14$ -trihydroxycinnamolide ( <b>7</b> )                                   | 43 |
| <b>Figure S40.</b> ECD spectrum of $6\beta,9\alpha,14$ -trihydroxycinnamolide ( <b>7</b> ) in methanol                                                     | 44 |
| <b>Figure S41.</b> $^1\text{H}$ NMR (500 MHz, acetone- $d_6$ ) spectrum of insulicolide A ( <b>8</b> )                                                     | 45 |
| <b>Figure S42.</b> $^{13}\text{C}$ NMR (125 MHz, acetone- $d_6$ ) spectrum of insulicolide A ( <b>8</b> )                                                  | 47 |
| <b>Figure S43.</b> DEPT-135 (125 MHz, acetone- $d_6$ ) spectrum of insulicolide A ( <b>8</b> )                                                             | 48 |
| <b>Figure S44.</b> ECD spectrum of insulicolide A ( <b>8</b> ) in methanol                                                                                 | 49 |
| <b>Figure S45.</b> $^1\text{H}$ NMR (700 MHz, $\text{DMSO}-d_6$ ) spectrum of $6\beta,7\alpha,14$ -trihydroxyconfertifolin ( <b>9</b> )                    | 50 |
| <b>Figure S46.</b> $^{13}\text{C}$ NMR (125 MHz, $\text{DMSO}-d_6$ ) spectrum of $6\beta,7\alpha,14$ -trihydroxyconfertifolin ( <b>9</b> )                 | 52 |
| <b>Figure S47.</b> HSQC (700 MHz, $\text{DMSO}-d_6$ ) spectrum of $6\beta,7\alpha,14$ -trihydroxyconfertifolin ( <b>9</b> )                                | 53 |
| <b>Figure S48.</b> HMBC (500 MHz, $\text{DMSO}-d_6$ ) spectrum of $6\beta,7\alpha,14$ -trihydroxyconfertifolin ( <b>9</b> )                                | 54 |
| <b>Figure S49.</b> ROESY (700 MHz, $\text{DMSO}-d_6$ ) spectrum of $6\beta,7\alpha,14$ -trihydroxyconfertifolin ( <b>9</b> )                               | 55 |
| <b>Figure S50.</b> $^1\text{H}$ NMR (500 MHz, MeOD) spectrum of $6\beta,7\alpha,14$ -trihydroxyconfertifolin ( <b>9</b> )                                  | 57 |
| <b>Figure S51.</b> $^{13}\text{C}$ NMR (125 MHz, MeOD) spectrum of $6\beta,7\alpha,14$ -trihydroxyconfertifolin ( <b>9</b> )                               | 59 |
| <b>Figure S52.</b> DEPT-135 (125 MHz, MeOD) spectrum of $6\beta,7\alpha,14$ -trihydroxyconfertifolin ( <b>9</b> )                                          | 60 |
| <b>Figure S53.</b> $^1\text{H}$ - $^1\text{H}$ COSY (700 MHz, MeOD) spectrum of $6\beta,7\alpha,14$ -trihydroxyconfertifolin ( <b>9</b> )                  | 61 |
| <b>Figure S54.</b> ECD spectrum of $6\beta,7\alpha,14$ -trihydroxyconfertifolin ( <b>9</b> ) in methanol                                                   | 62 |
| <b>Figure S55.</b> $^1\text{H}$ NMR (700 MHz, acetone- $d_6$ ) spectrum of $7\alpha,14$ -dihydroxy- $6\beta$ -p-nitrobenzoylconfertifolin ( <b>10</b> )    | 63 |
| <b>Figure S56.</b> $^{13}\text{C}$ NMR (175 MHz, acetone- $d_6$ ) spectrum of $7\alpha,14$ -dihydroxy- $6\beta$ -p-nitrobenzoylconfertifolin ( <b>10</b> ) | 65 |
| <b>Figure S57.</b> ECD spectrum of $7\alpha,14$ -dihydroxy- $6\beta$ -p-nitrobenzoylconfertifolin ( <b>10</b> ) in methanol                                | 66 |

**Figure S1.** <sup>1</sup>H NMR (500 MHz, CDCl<sub>3</sub>) spectrum of aspilactonol F (**1**)

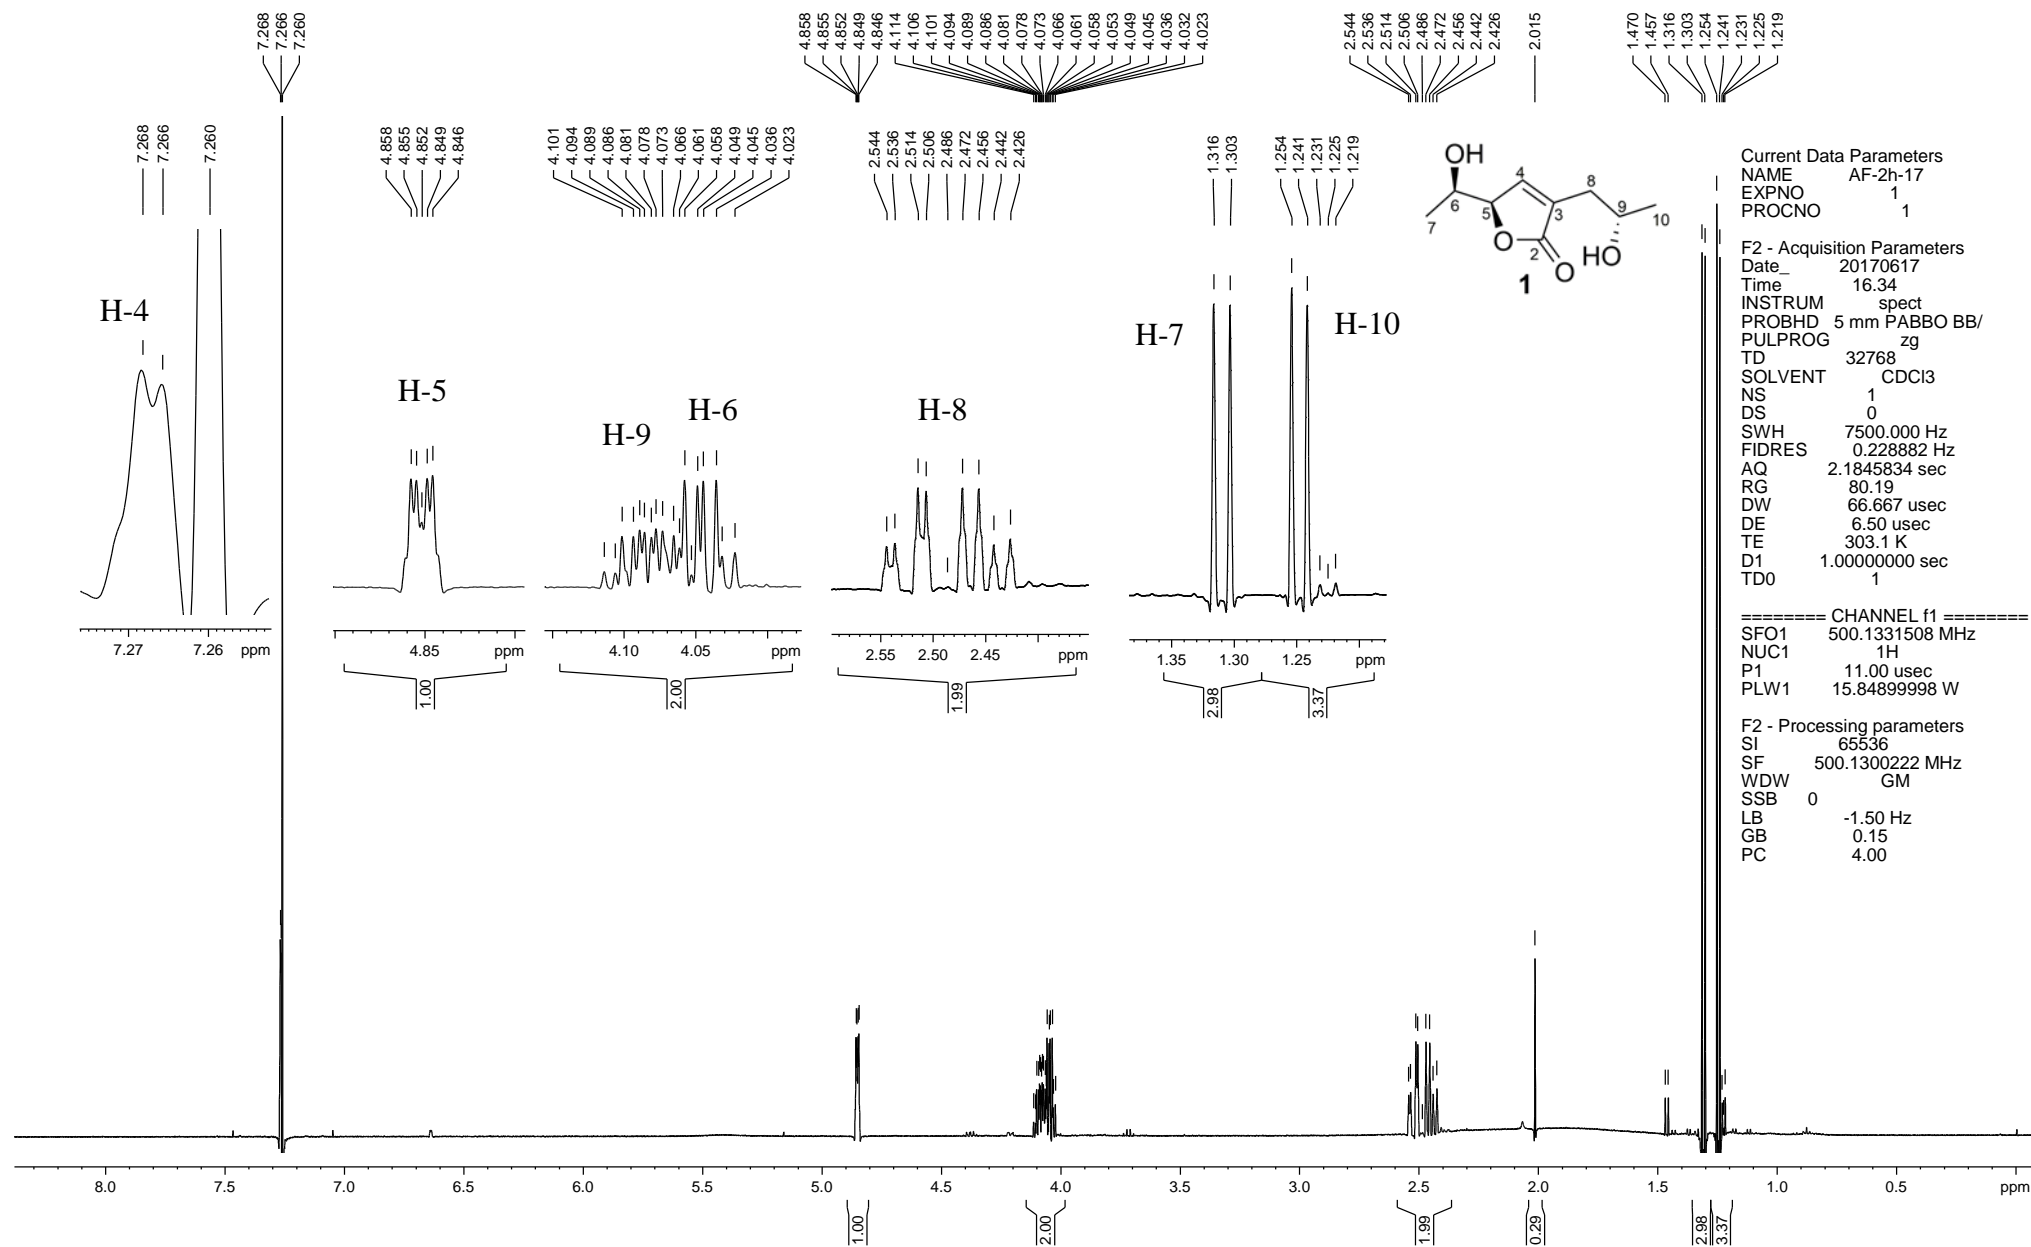

**Figure S2.**  $^{13}\text{C}$  NMR (125 MHz,  $\text{CDCl}_3$ ) spectrum of aspilactonol F (**1**)

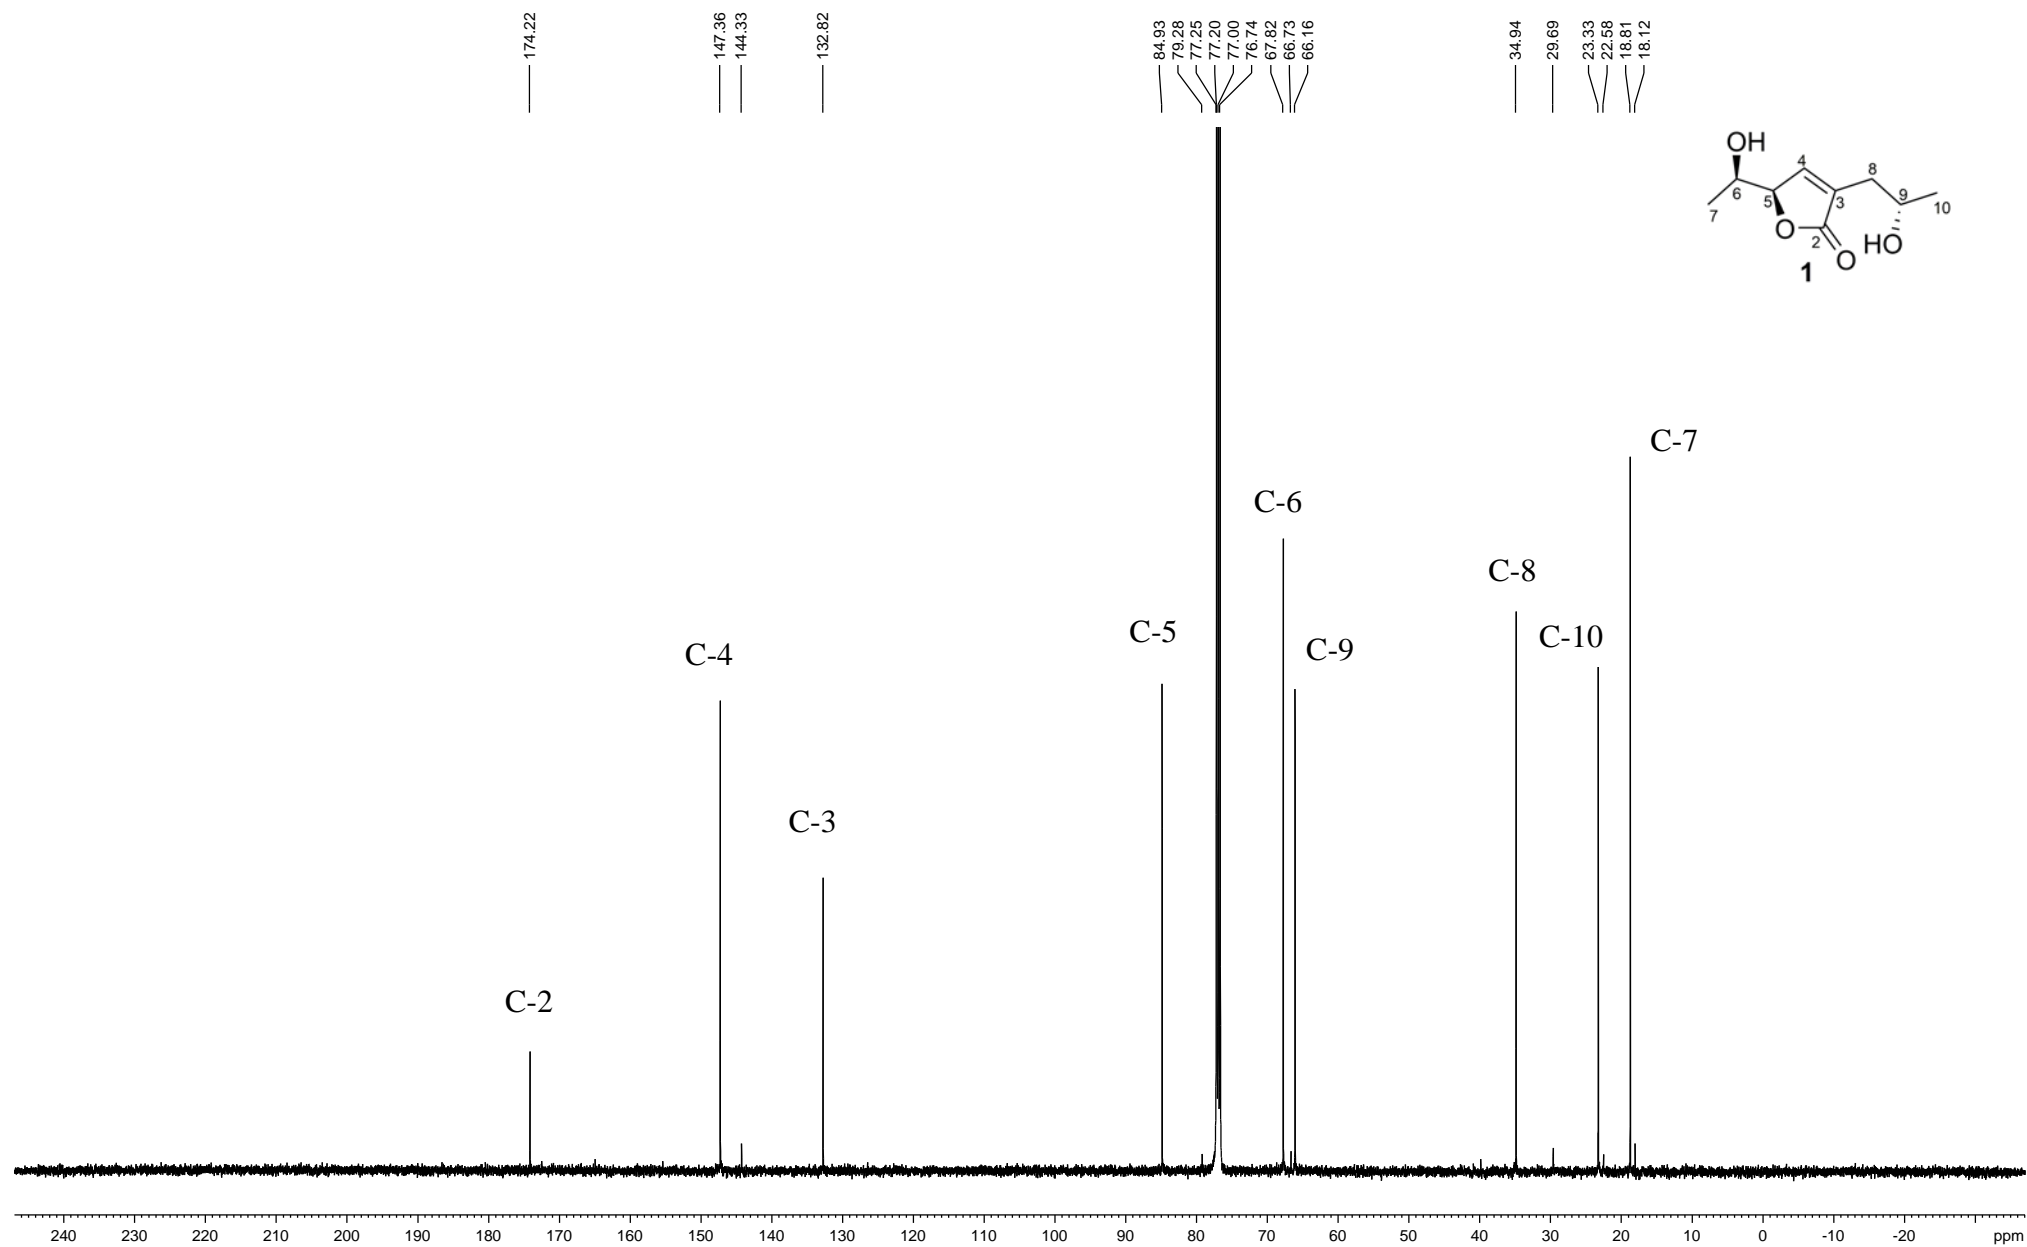

**Figure S3.** DEPT-135 (125 MHz, CDCl<sub>3</sub>) spectrum of aspilactonol F (**1**)

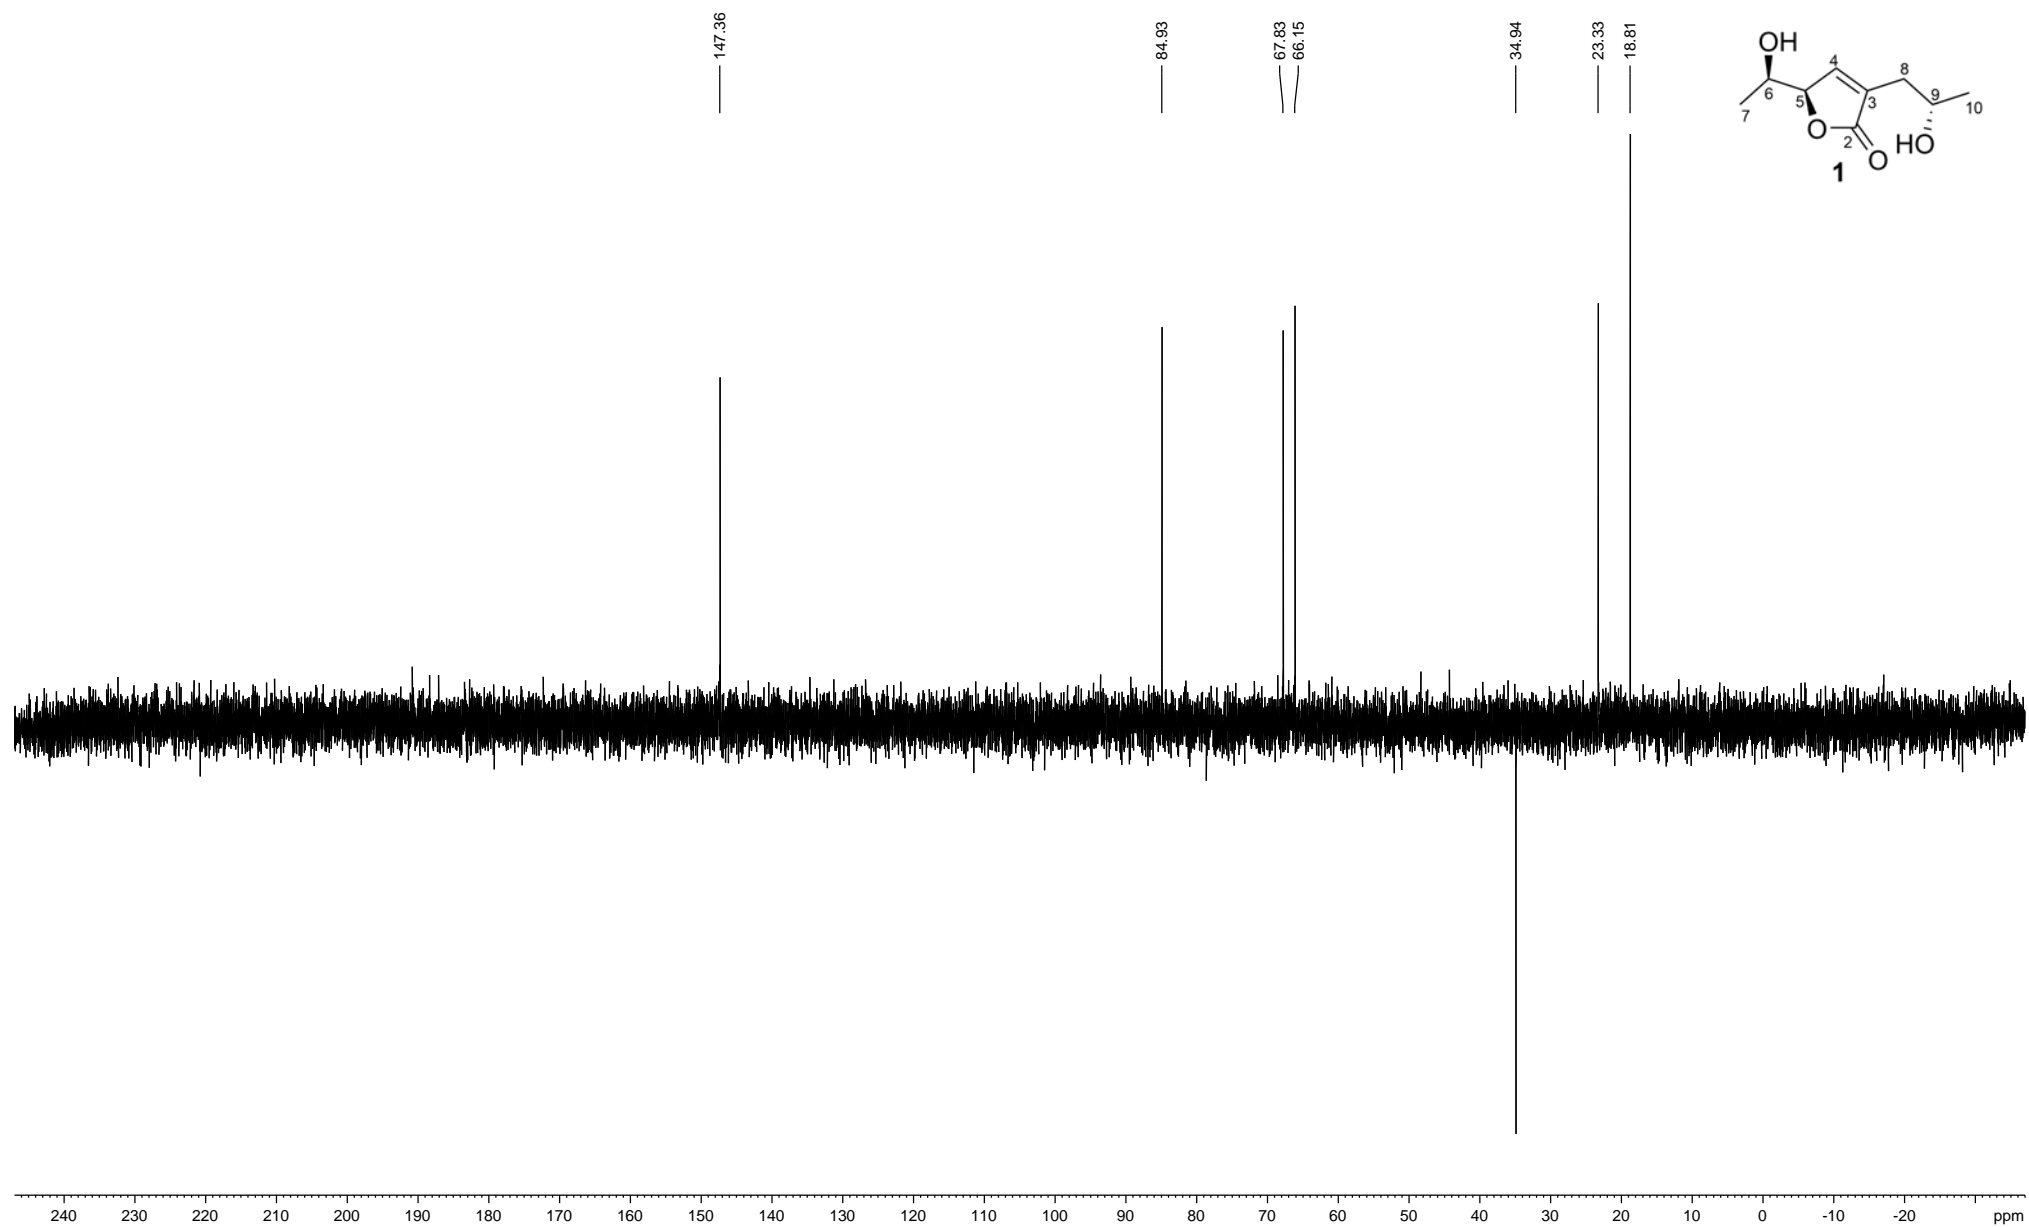

Figure S4.  $^1\text{H}$ - $^1\text{H}$  COSY (500 MHz,  $\text{CDCl}_3$ ) spectrum of aspilactonol F (**1**)

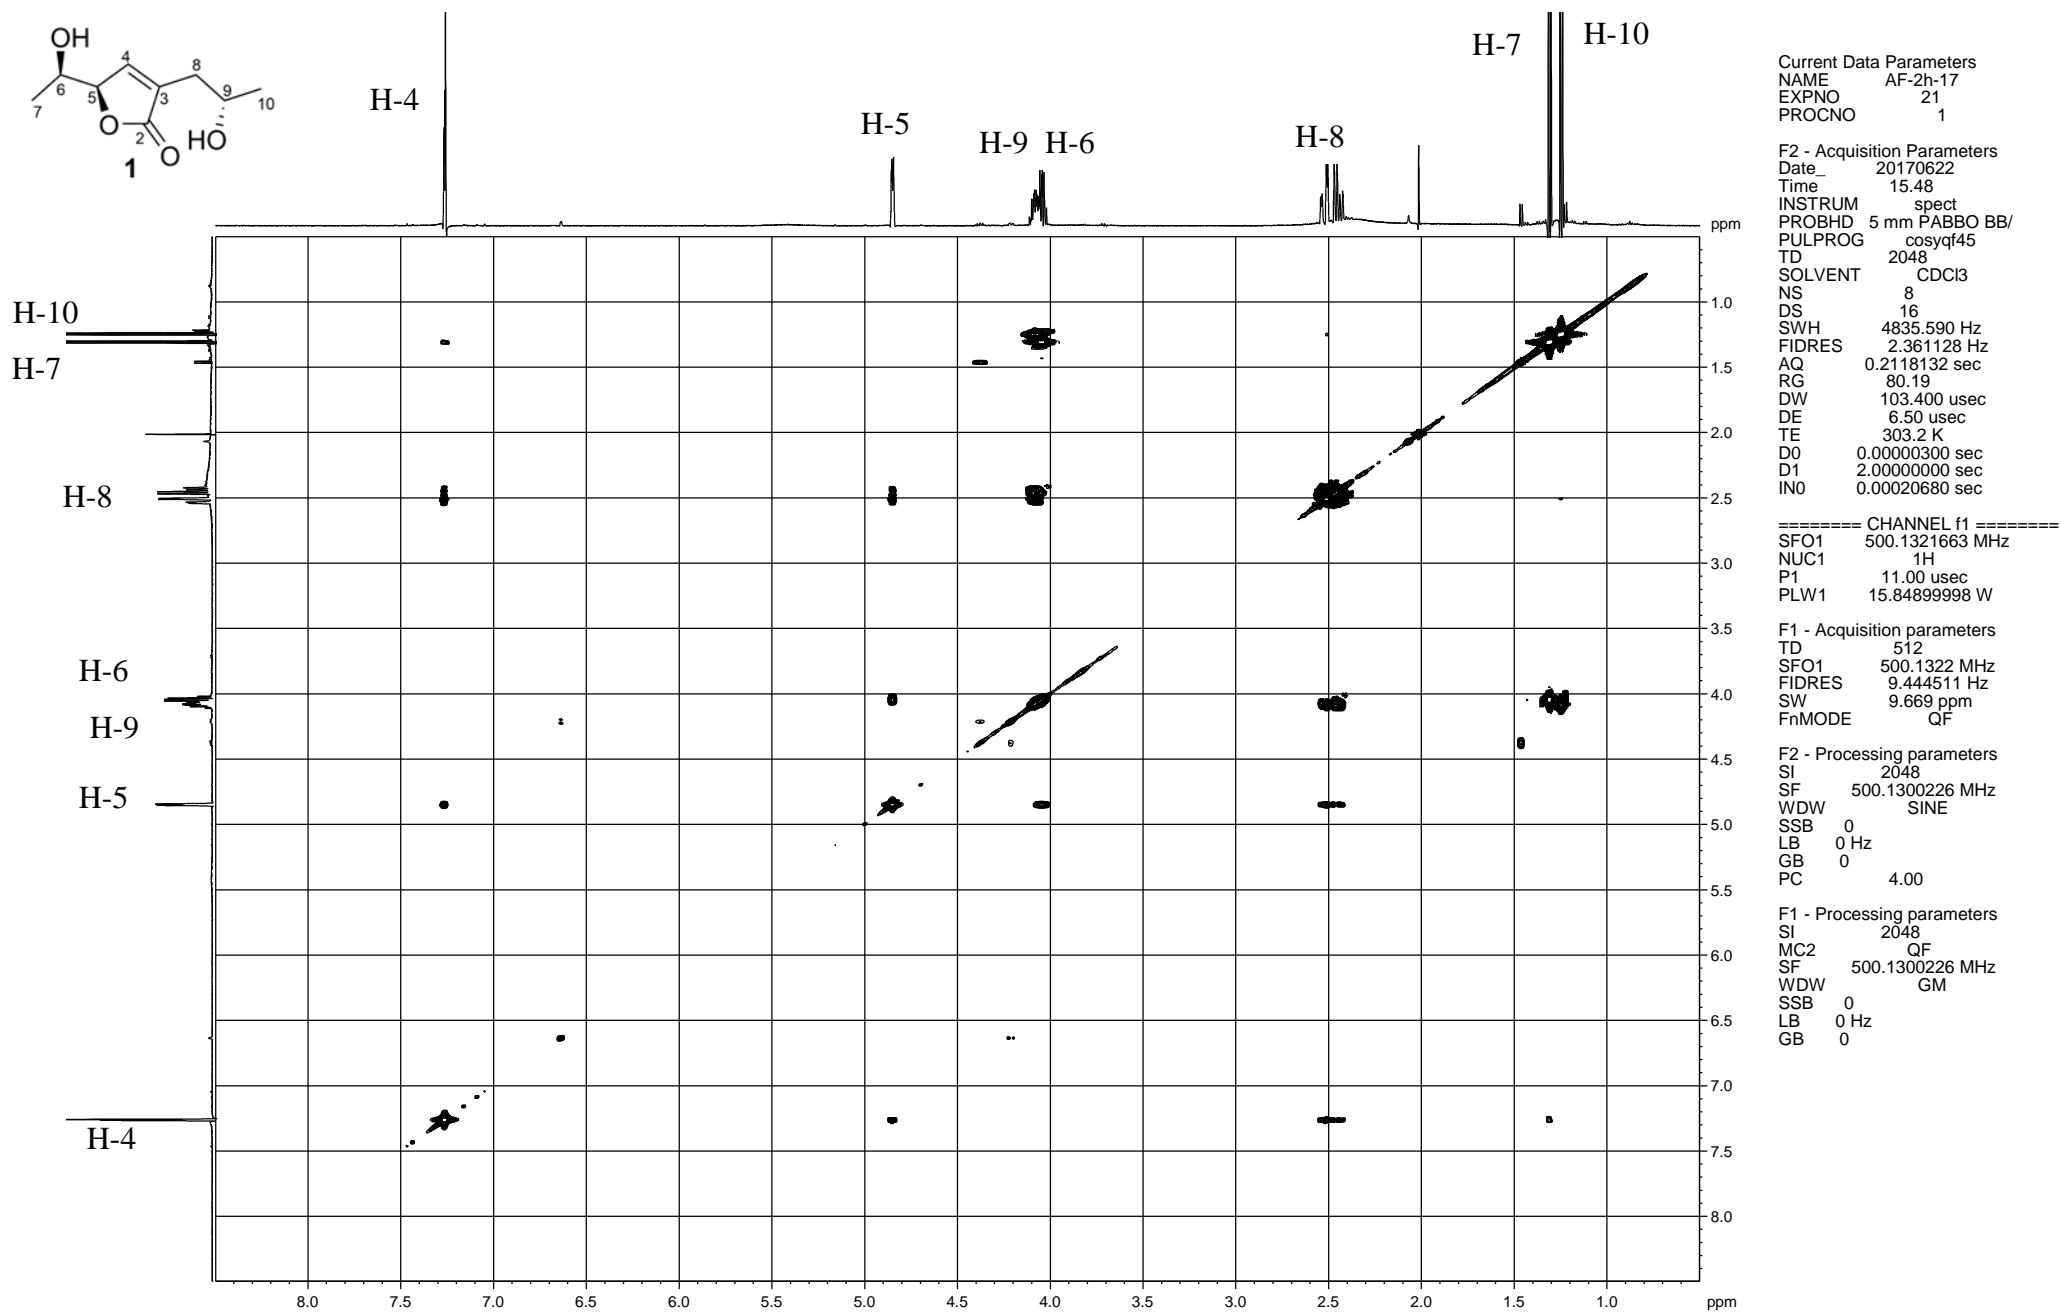

Figure S5. HSQC (500 MHz, CDCl<sub>3</sub>) spectrum of aspilactonol F (1)

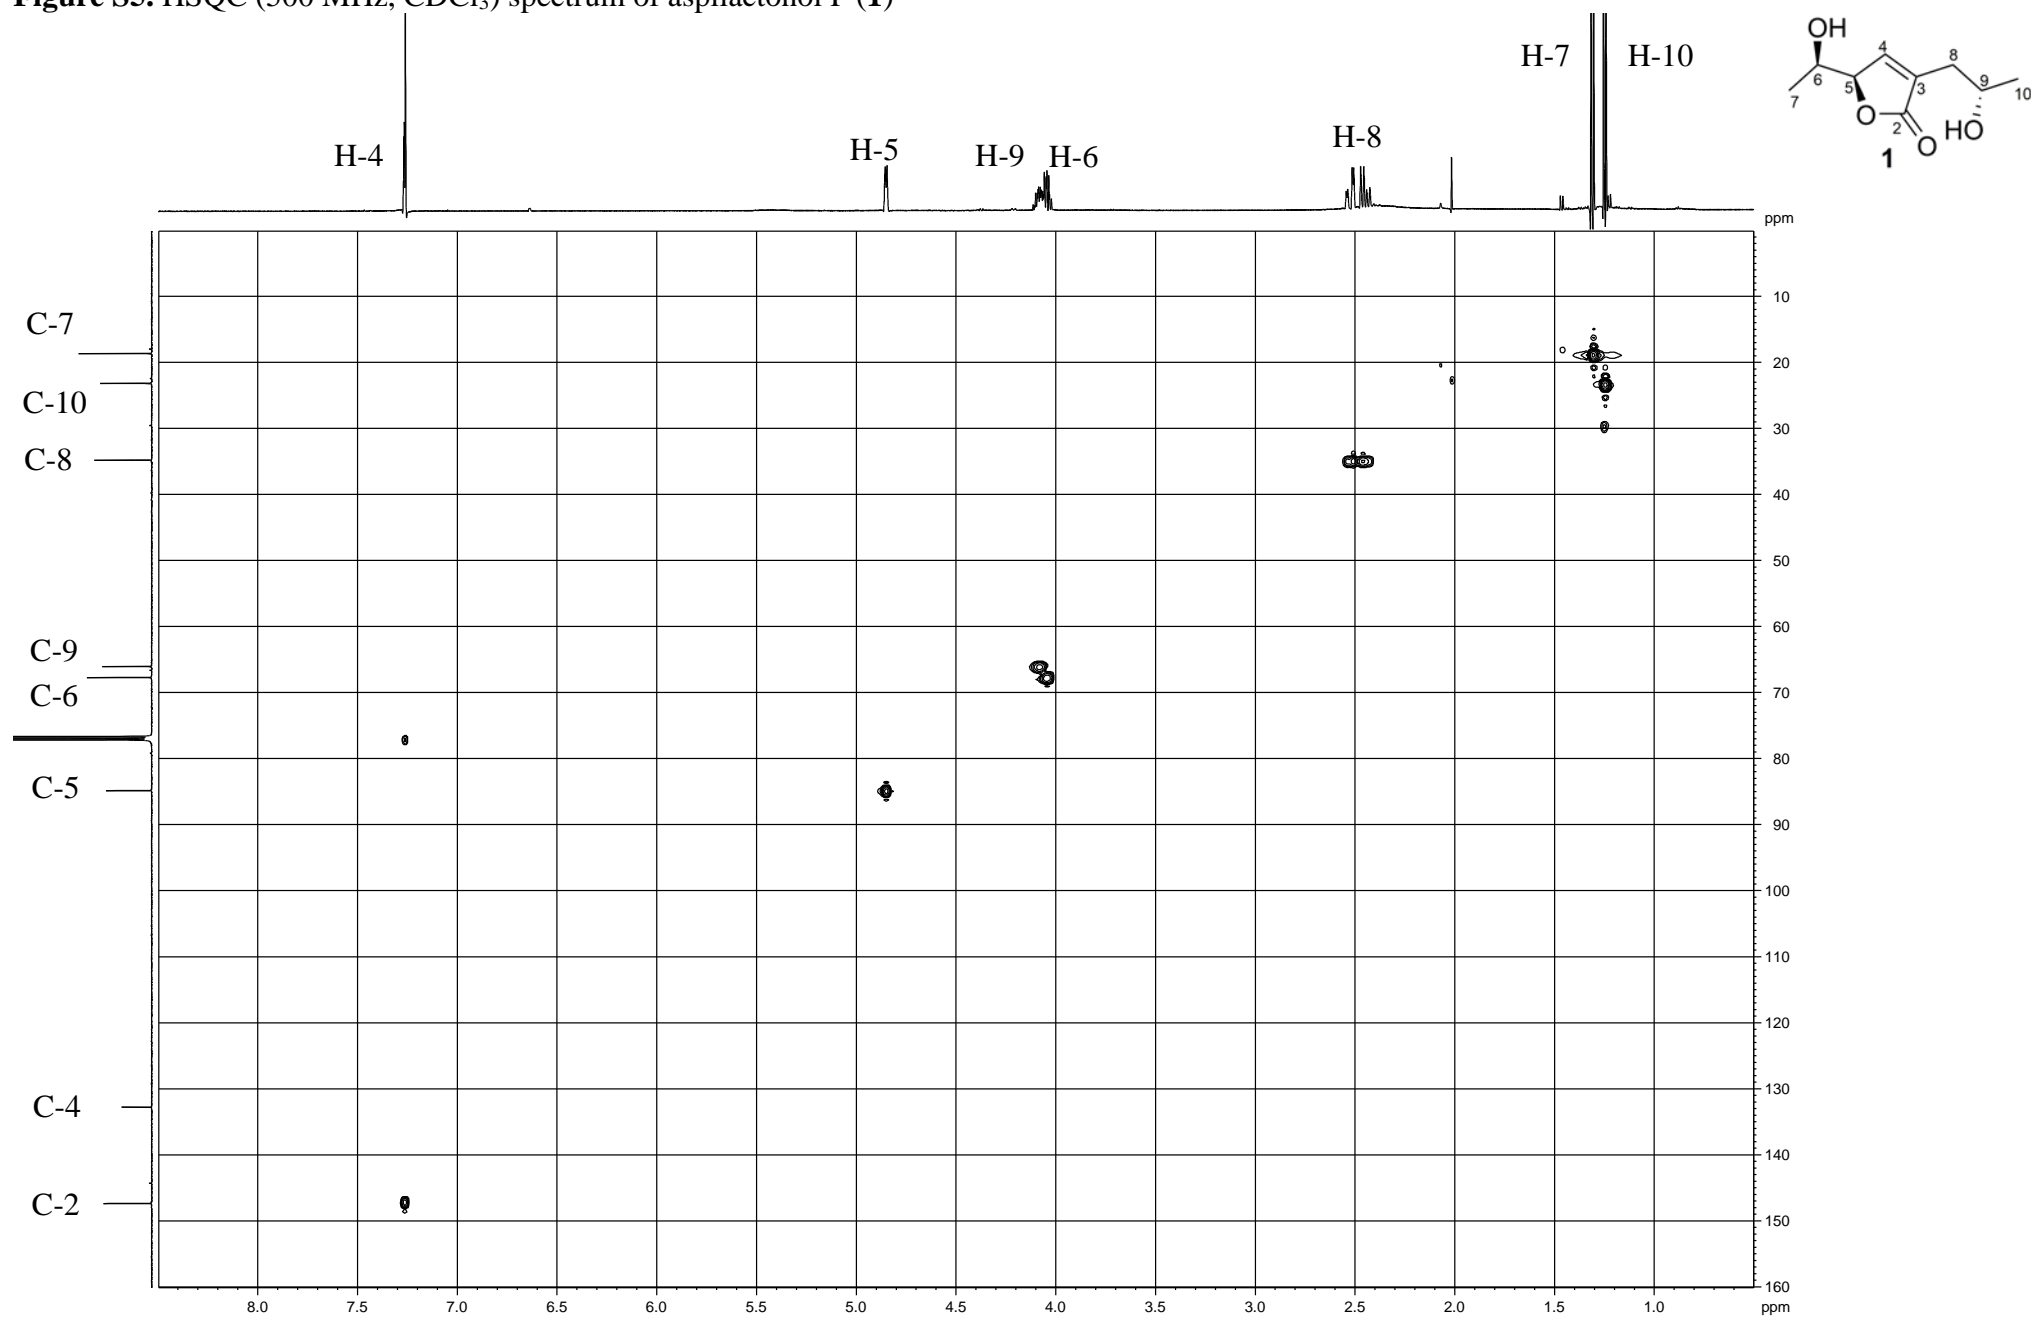



Figure S6. HMBC (500 MHz, CDCl<sub>3</sub>) spectrum of aspilactonol F (1)

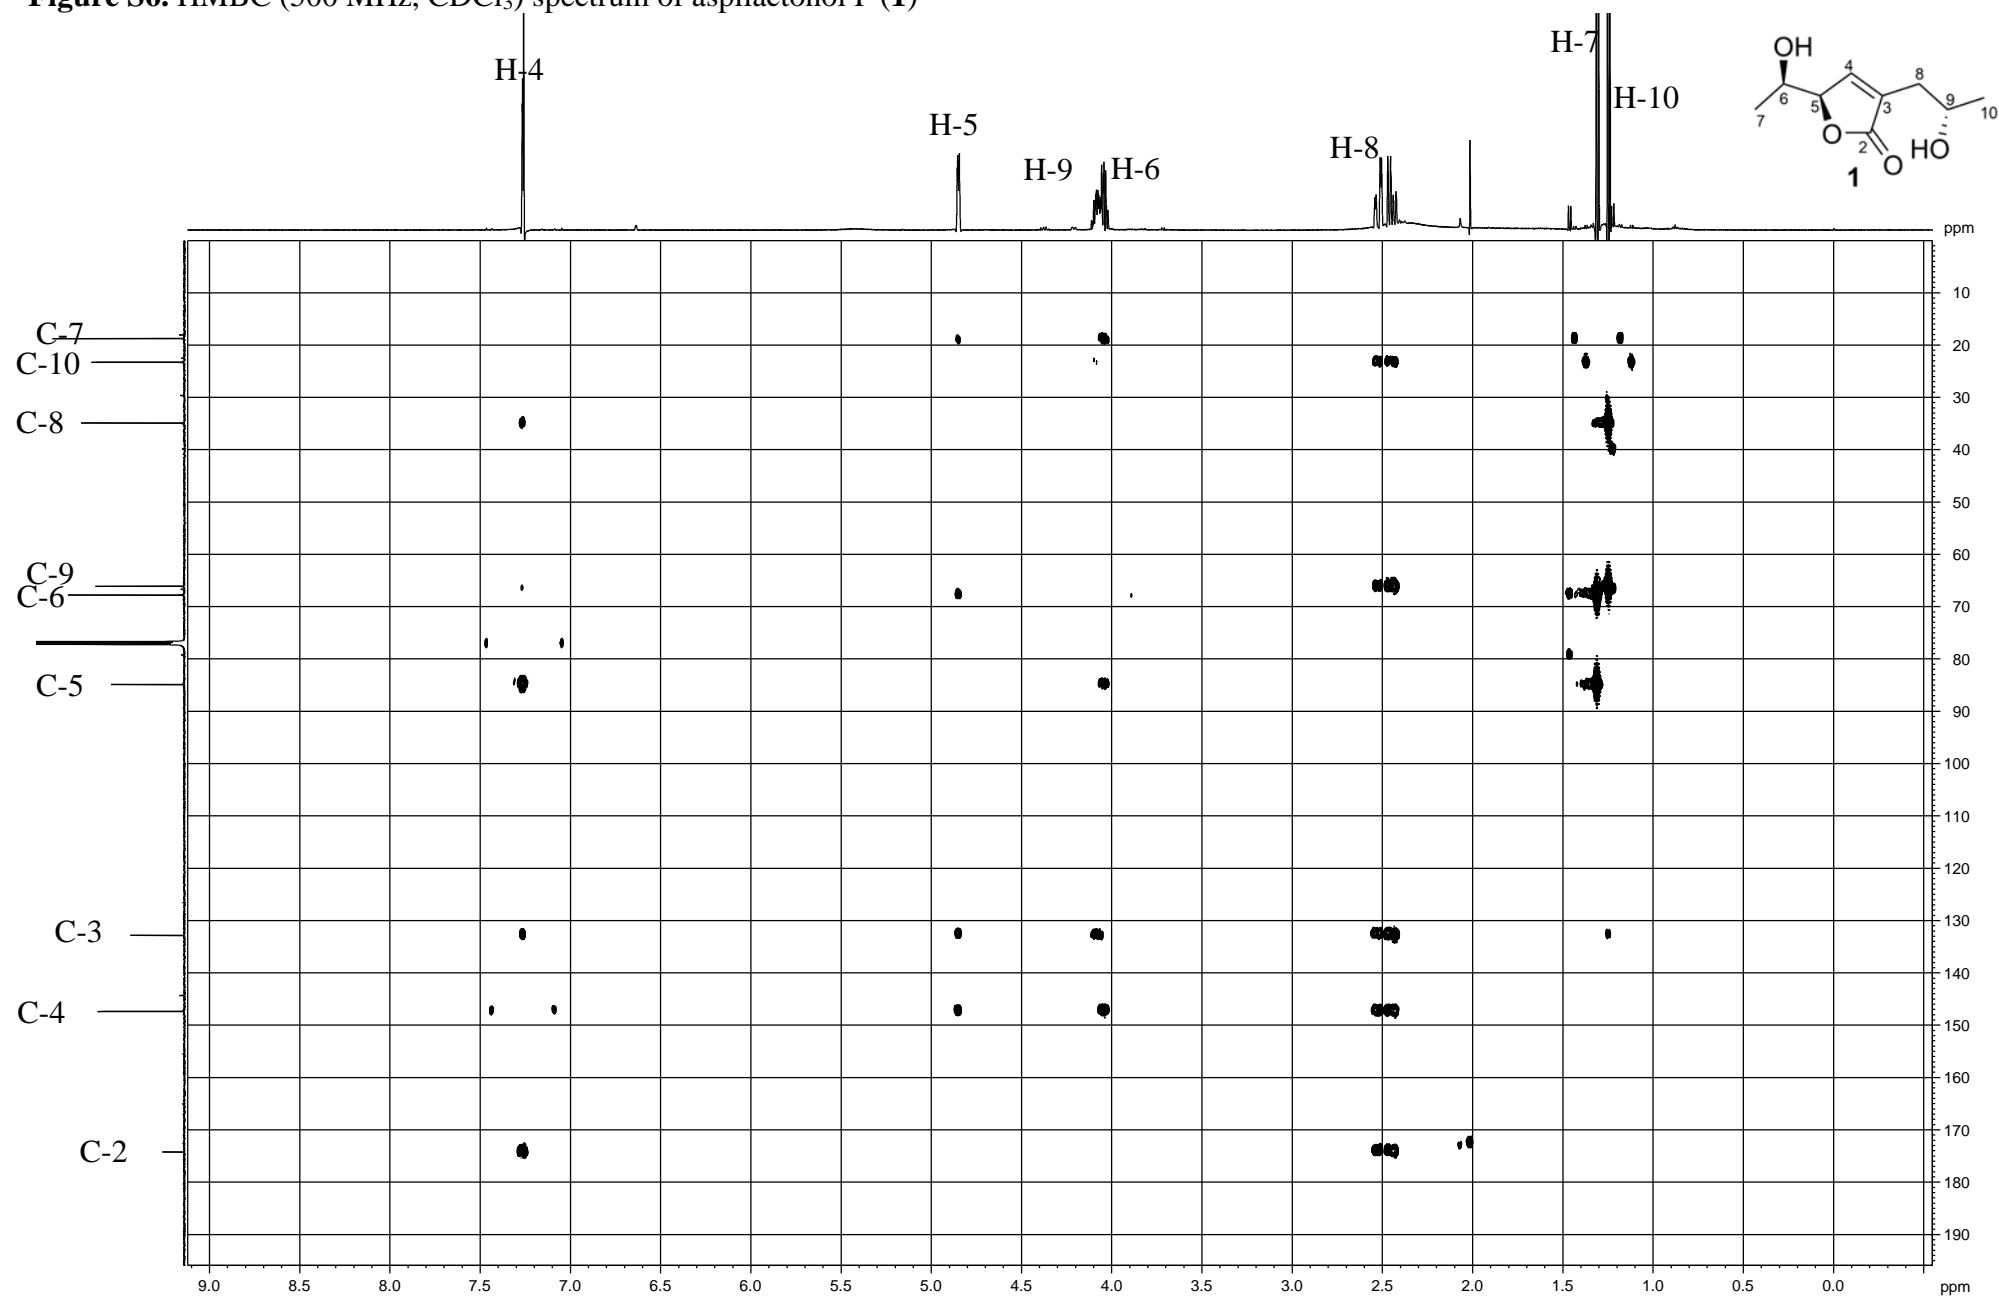

Figure S7. ROESY (500 MHz, CDCl<sub>3</sub>) spectrum of aspilactonol F (1)

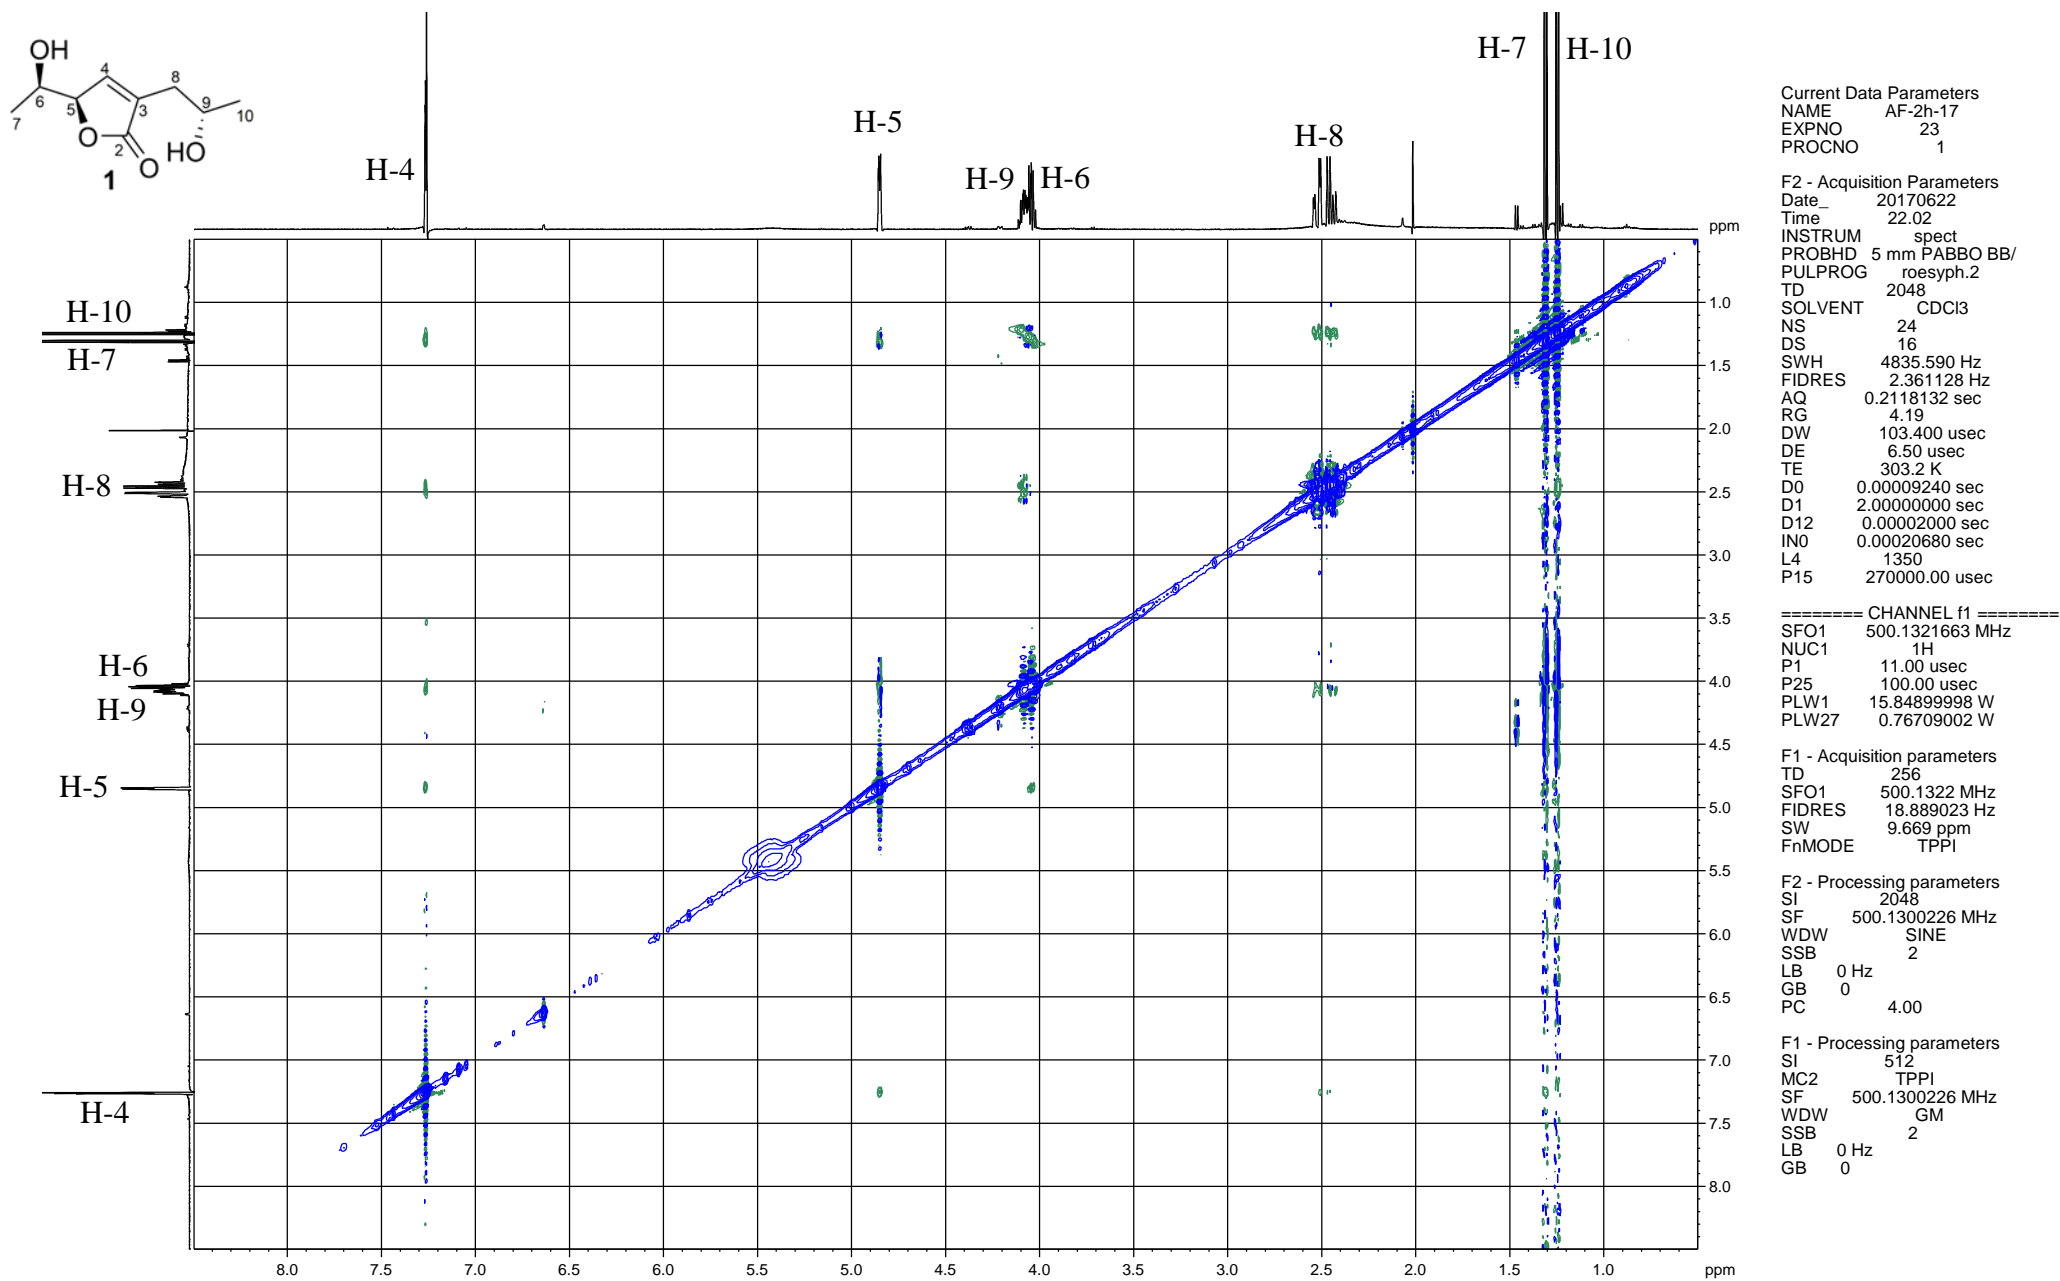

**Figure S8.** ECD spectrum of aspilactonol F (**1**) in methanol

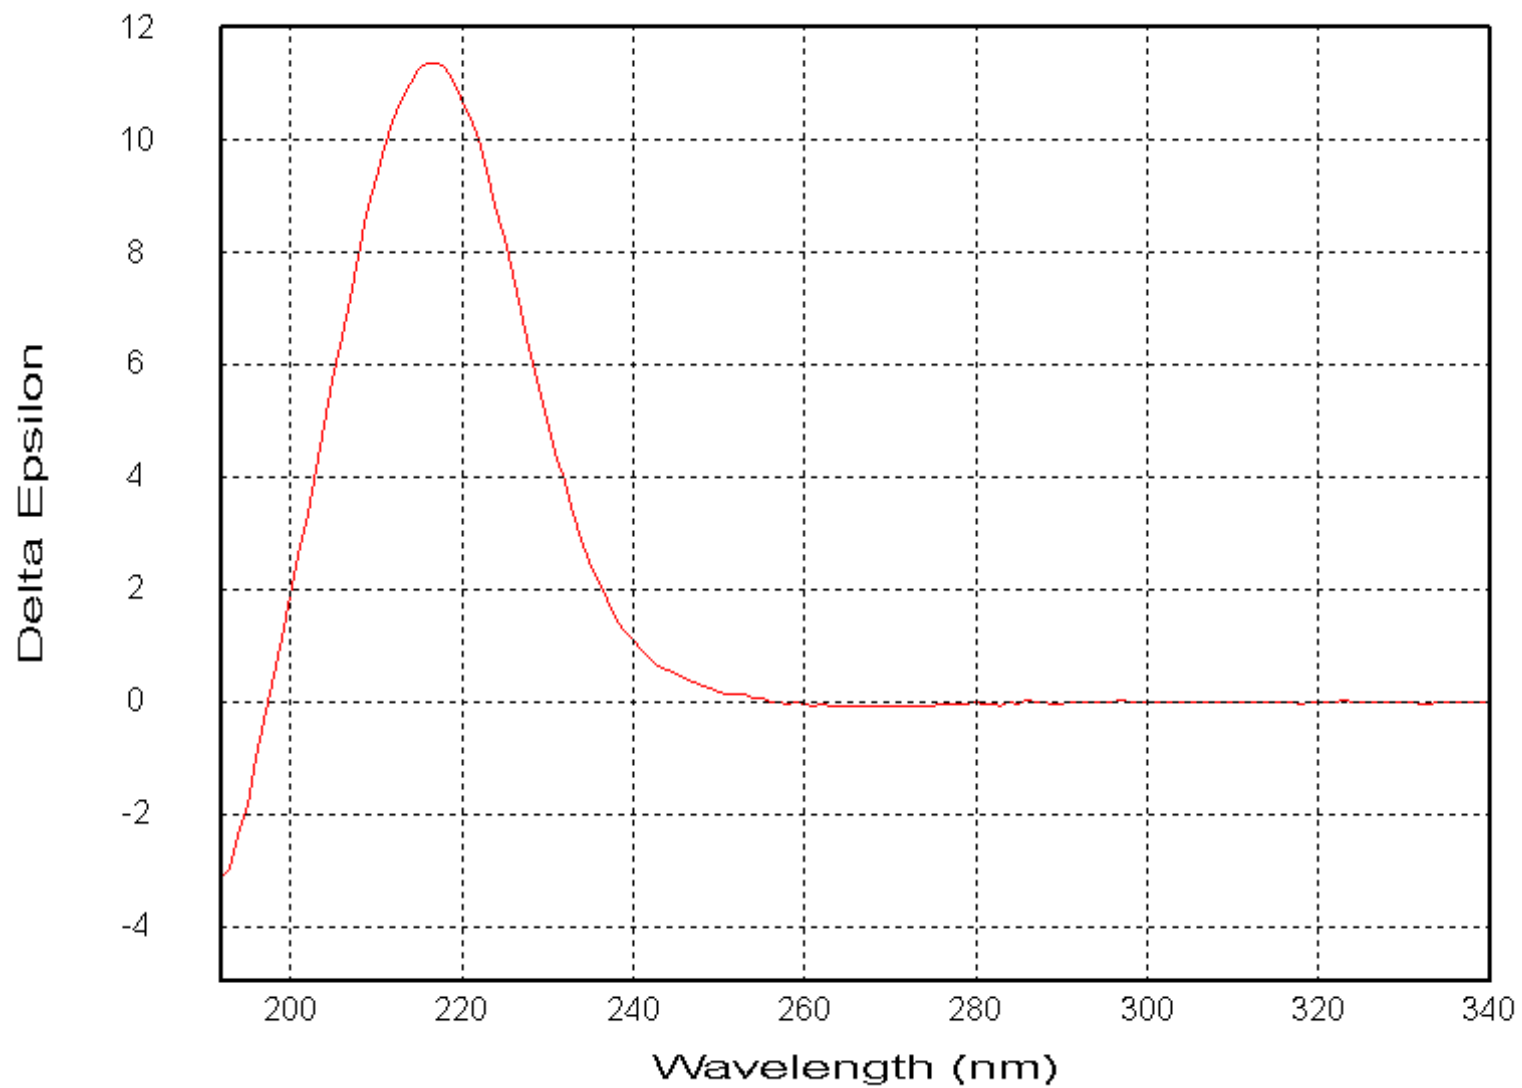

**Figure S9.**  $^1\text{H}$  NMR (500 MHz,  $\text{CDCl}_3$ ) spectrum of aspilactonol G (**2**)

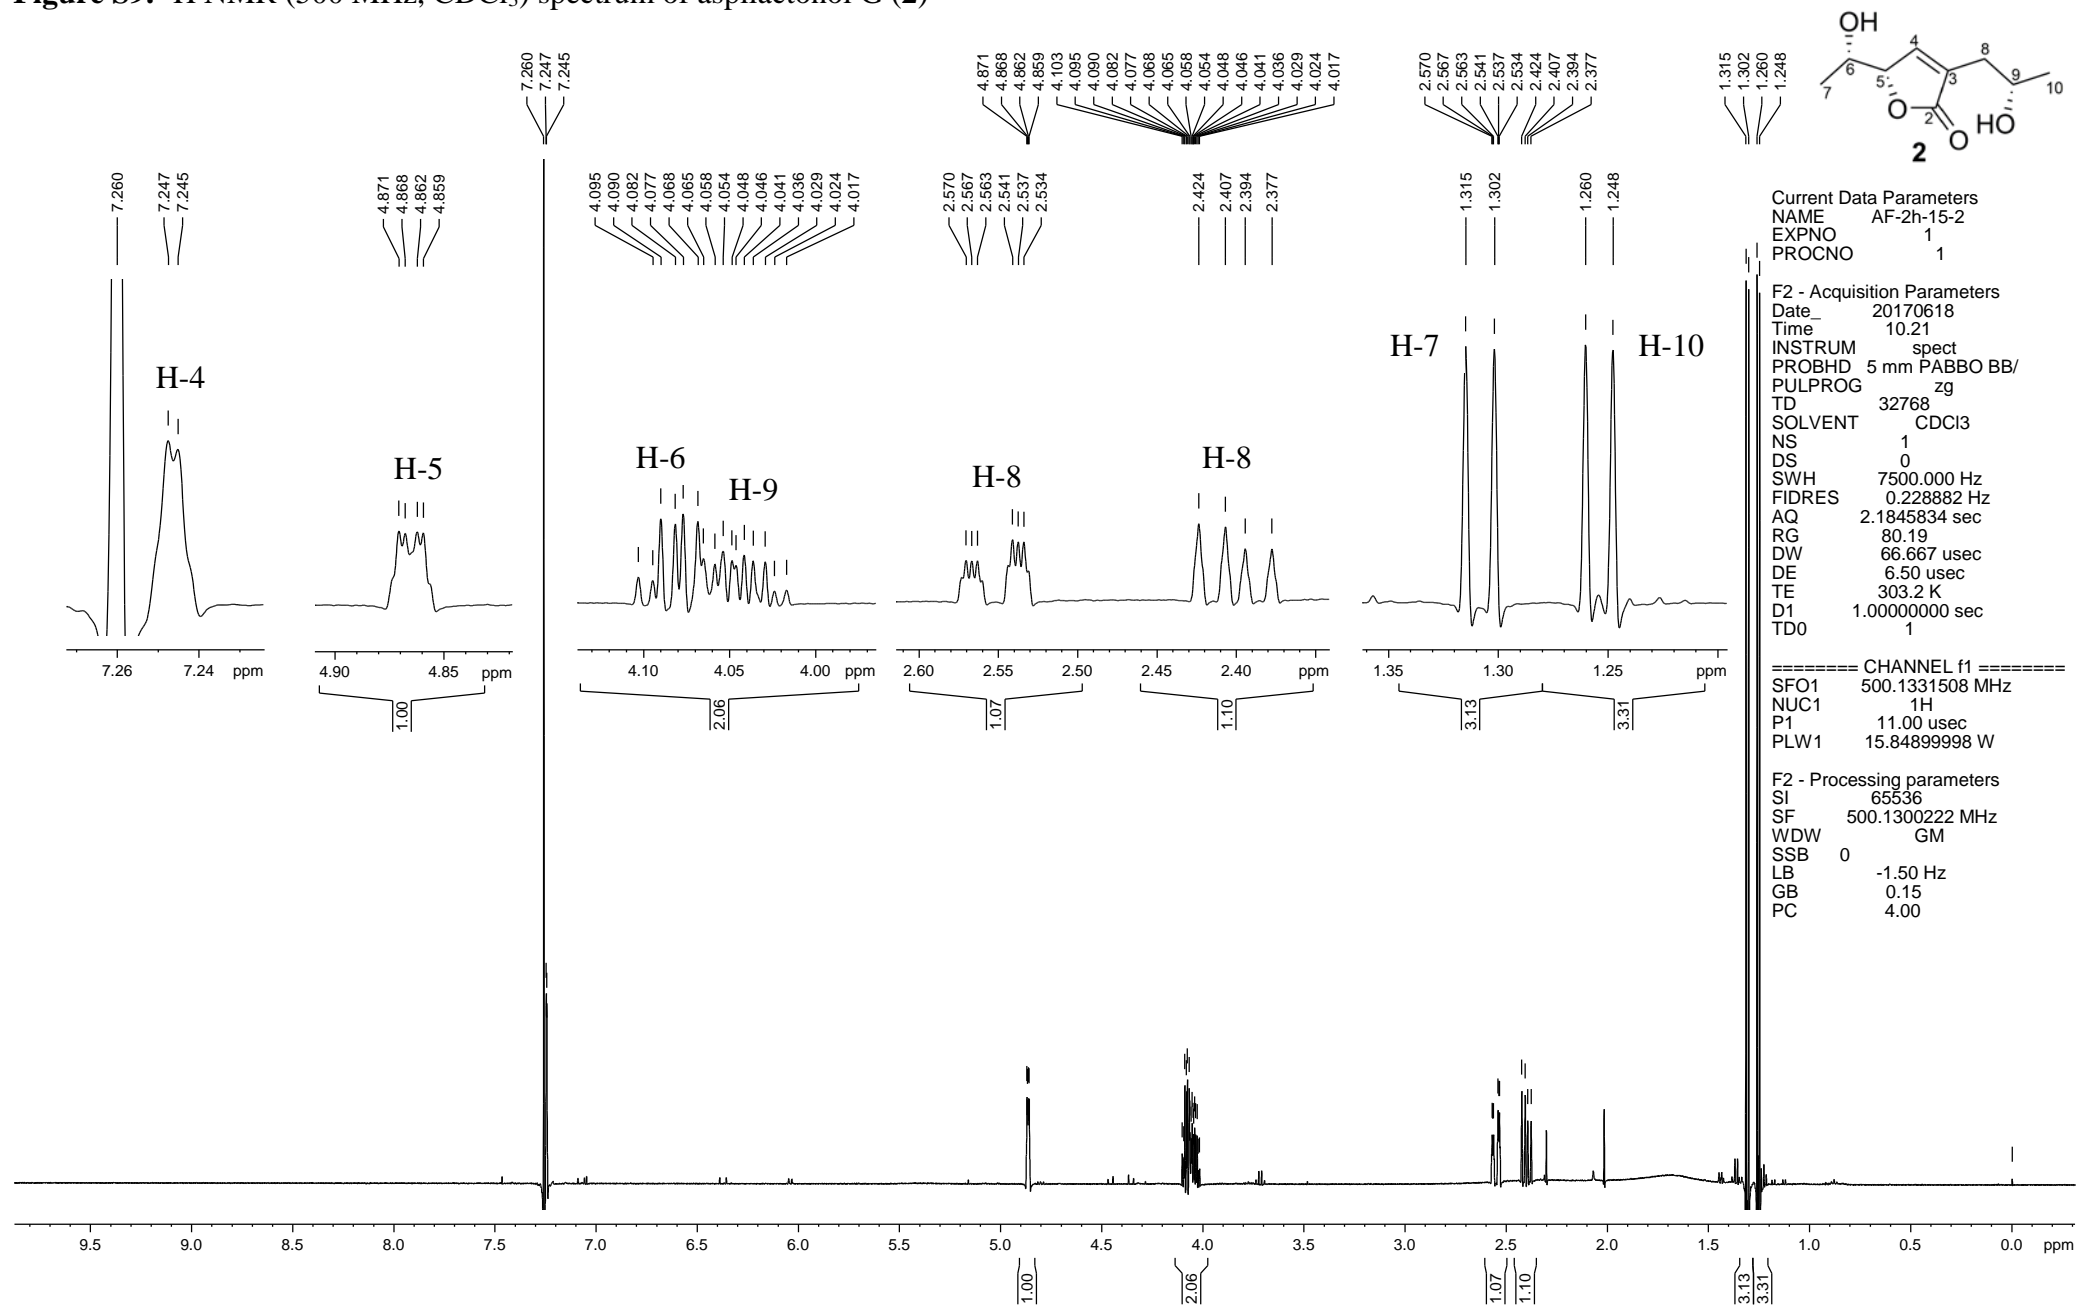

**Figure S10.**  $^{13}\text{C}$  NMR (125 MHz,  $\text{CDCl}_3$ ) spectrum of aspilactonol G (**2**)

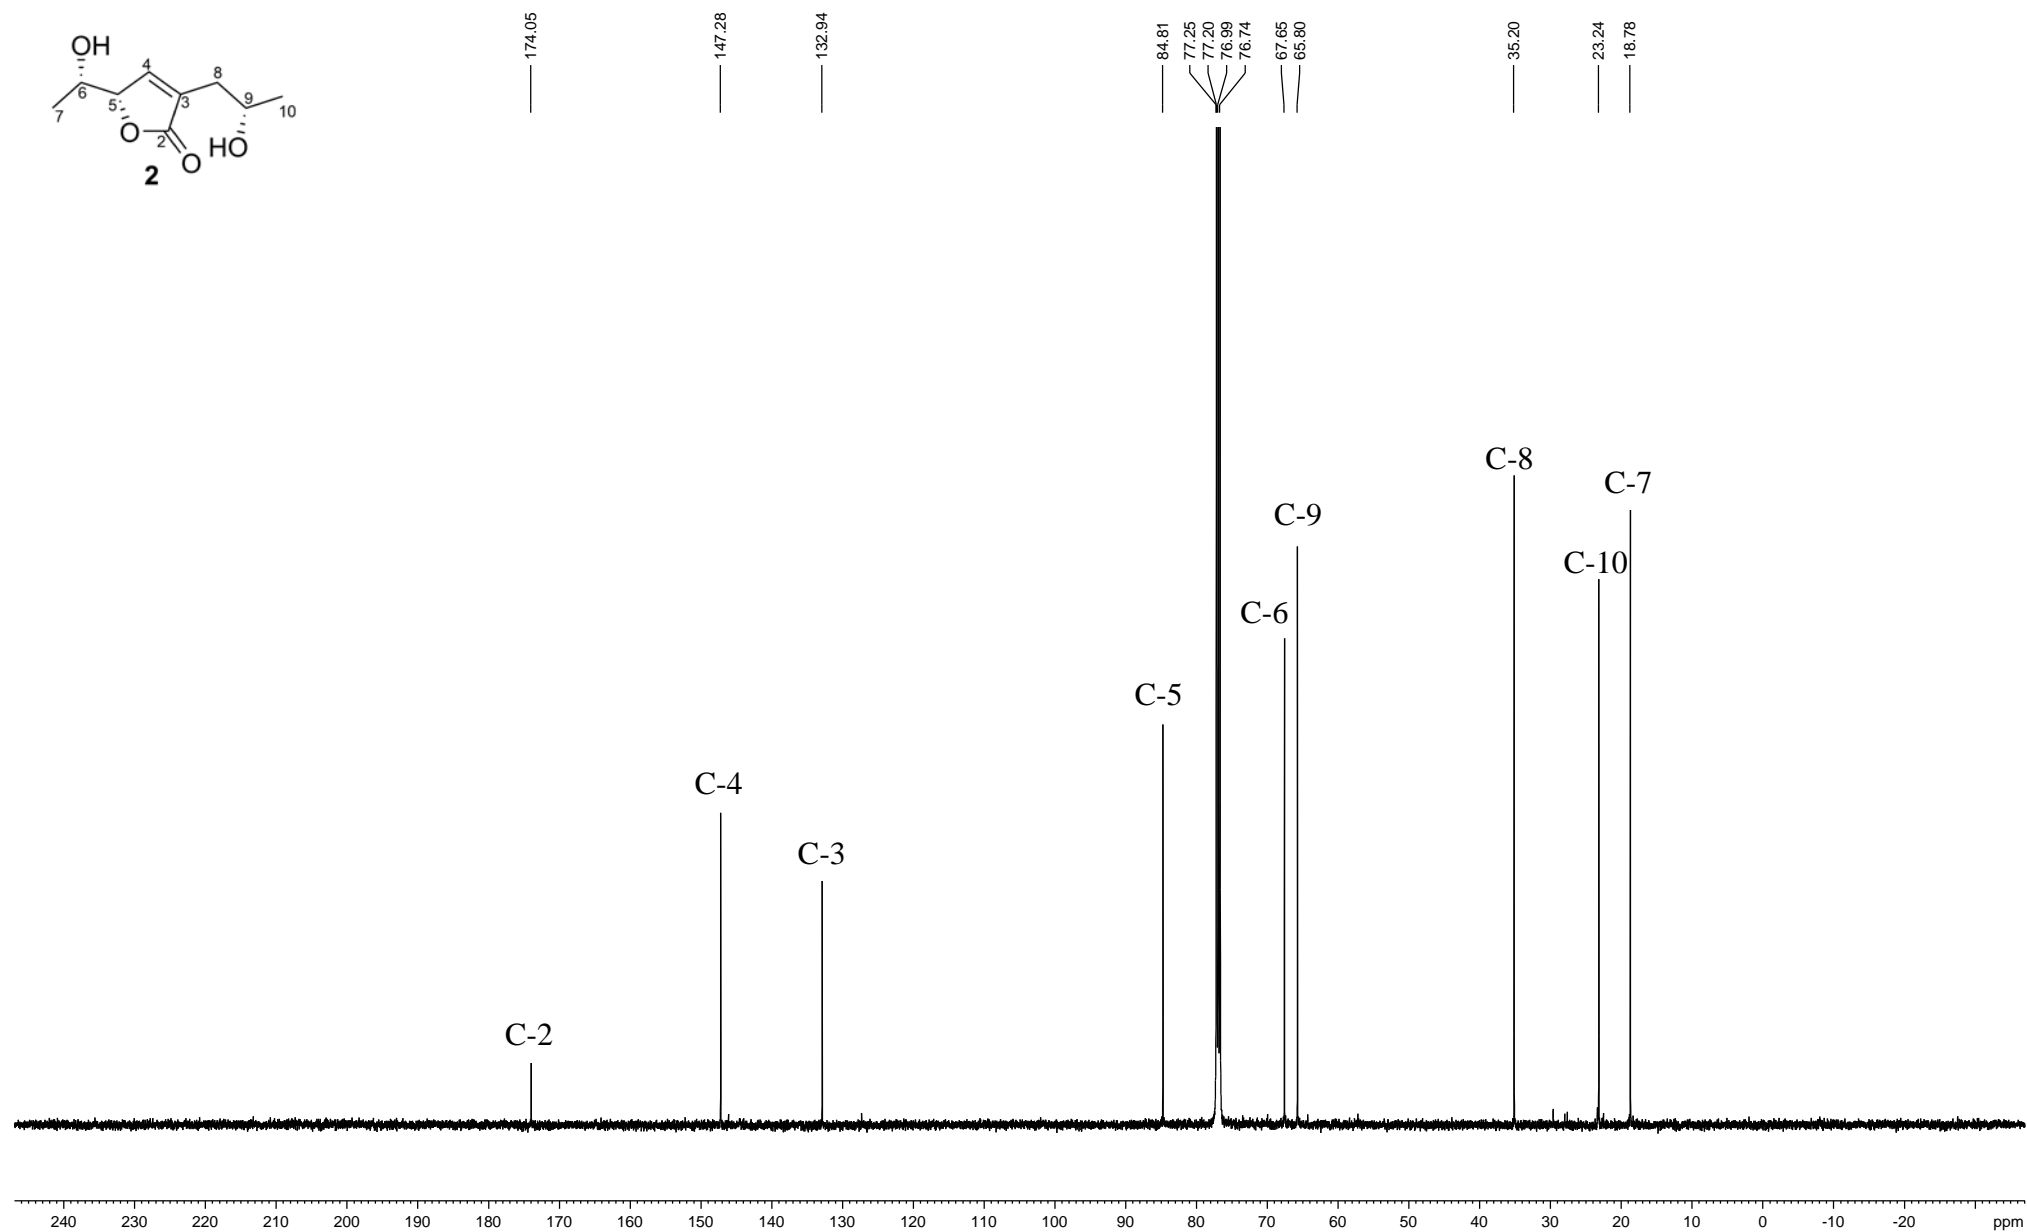

**Figure S11.** DEPT-135 (125 MHz, CDCl<sub>3</sub>) spectrum of aspilactonol G (**2**)

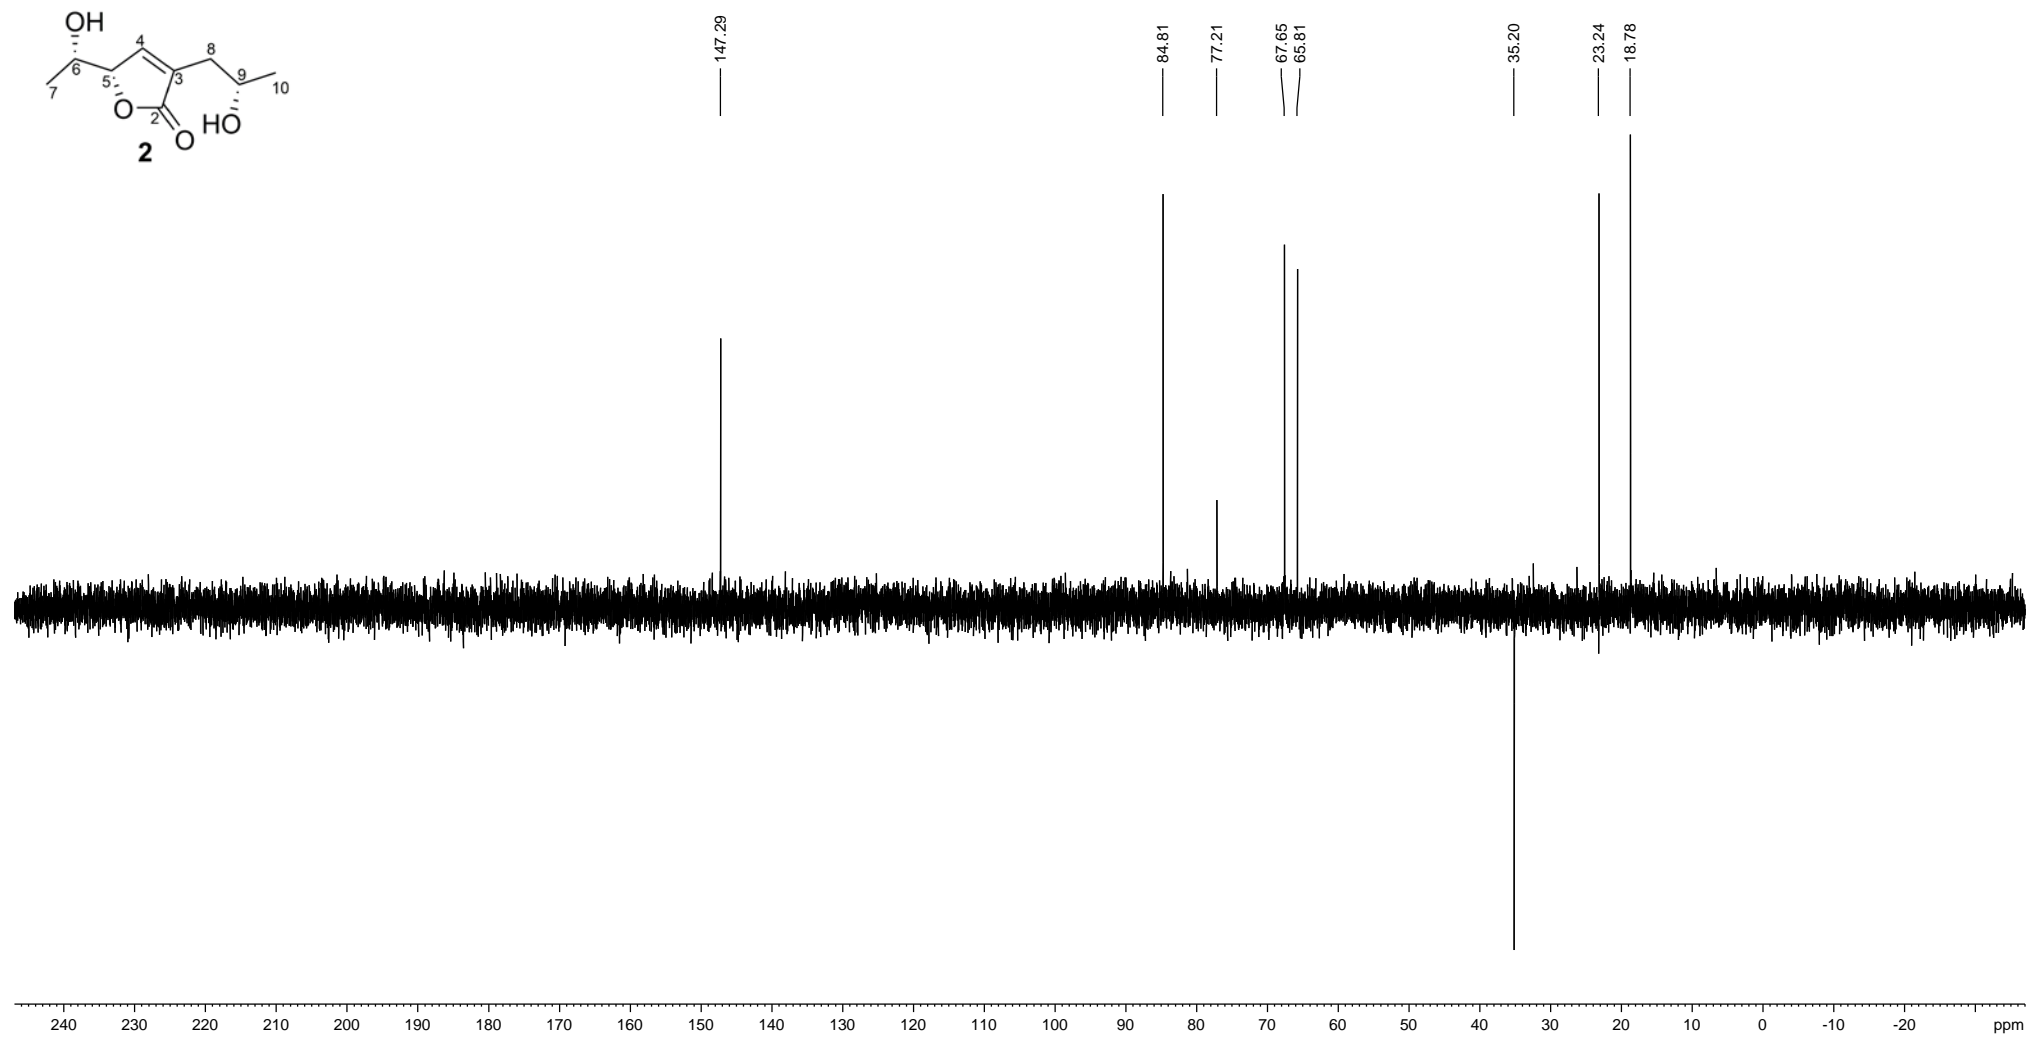

**Figure S12.**  $^1\text{H}$  NMR (700 MHz, acetone- $d_6$ ) spectrum of aspilactonol G (**2**)

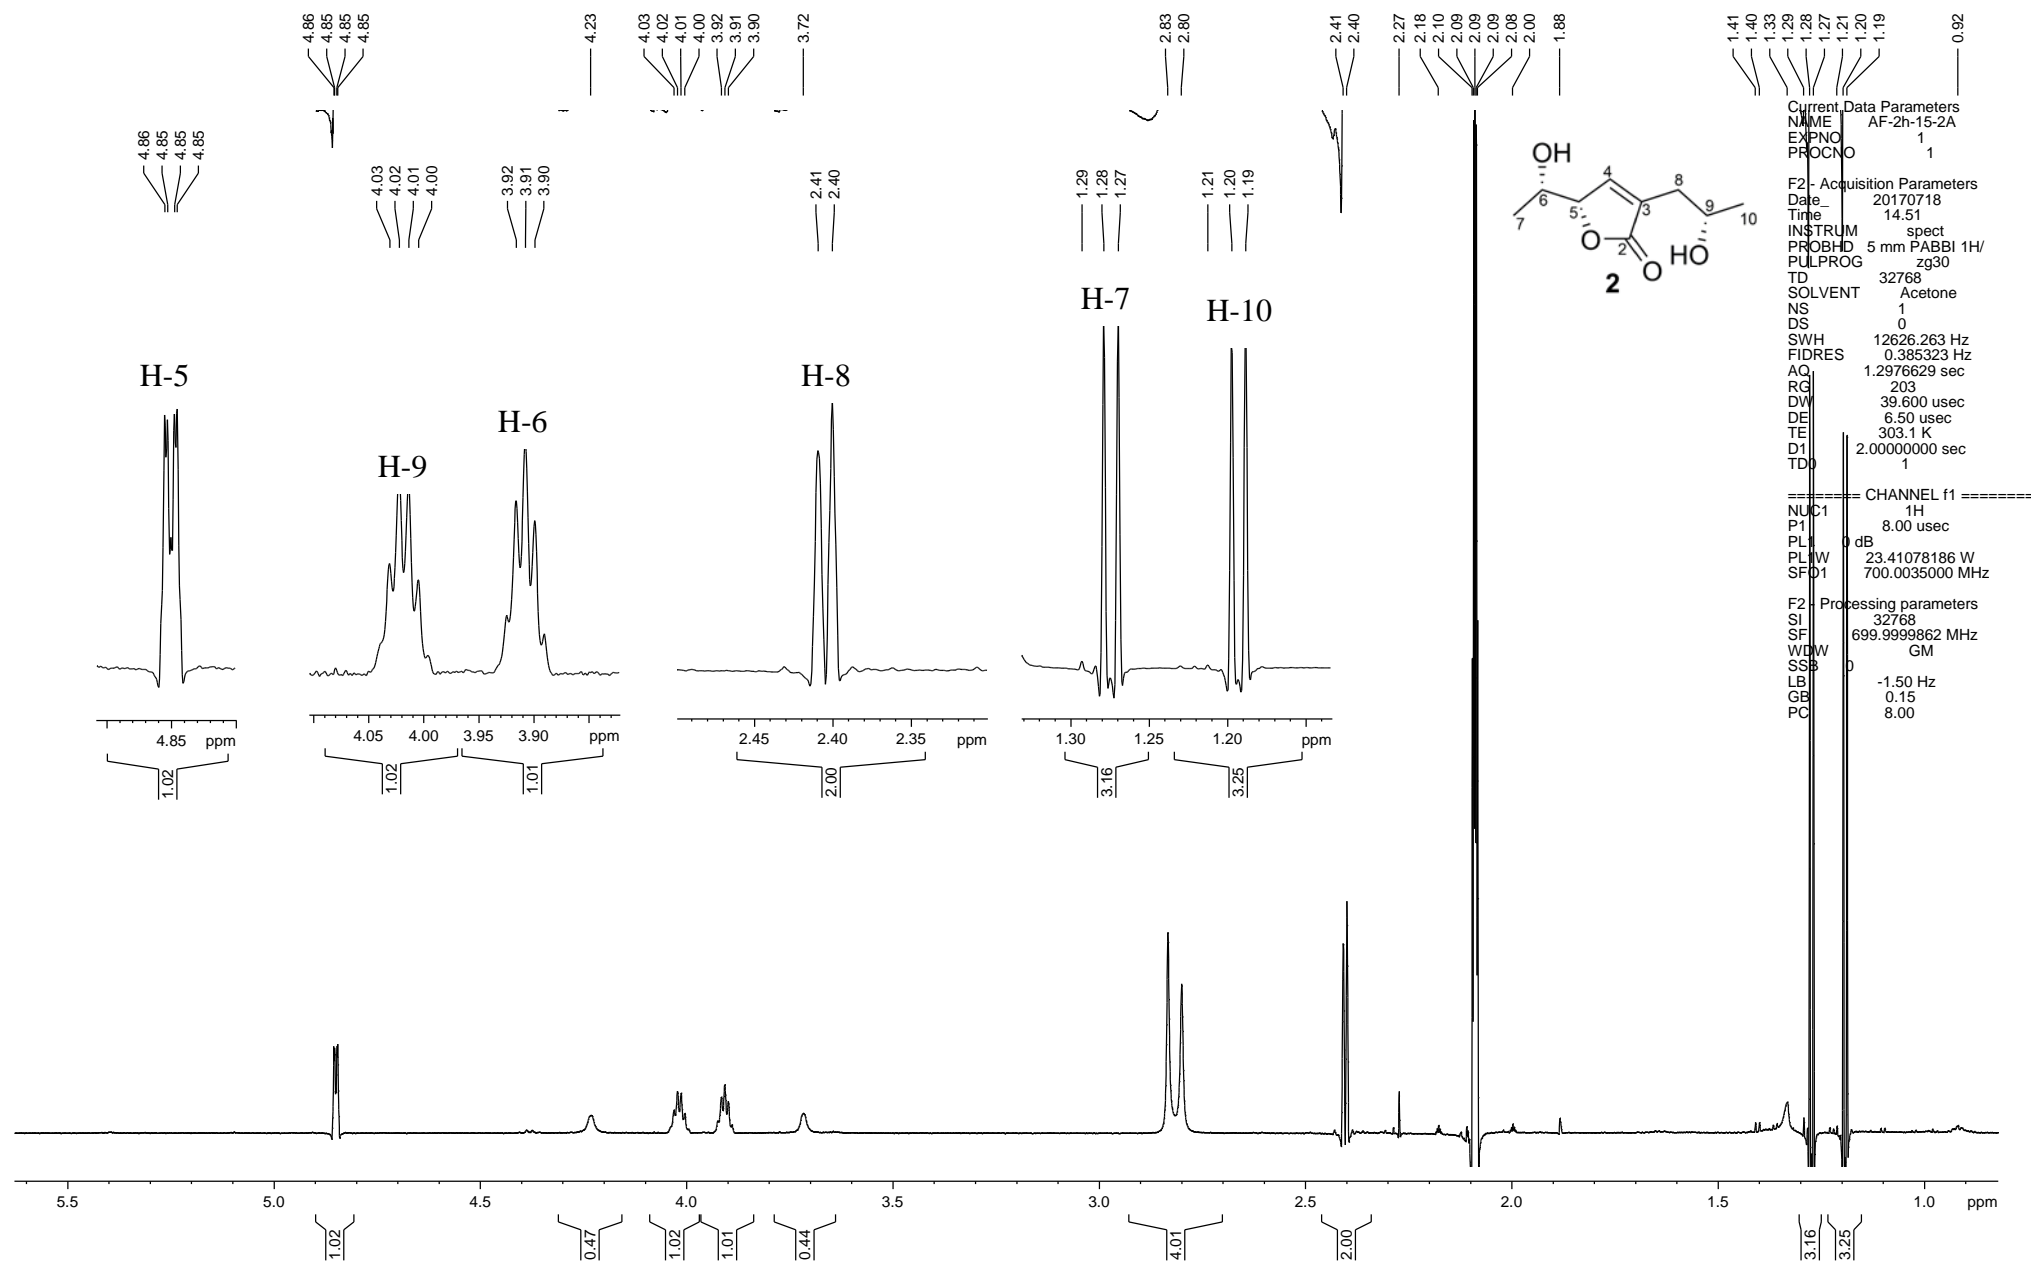

**Figure S13.**  $^{13}\text{C}$  NMR (125 MHz, acetone- $d_6$ ) spectrum of aspilactonol G (**2**)

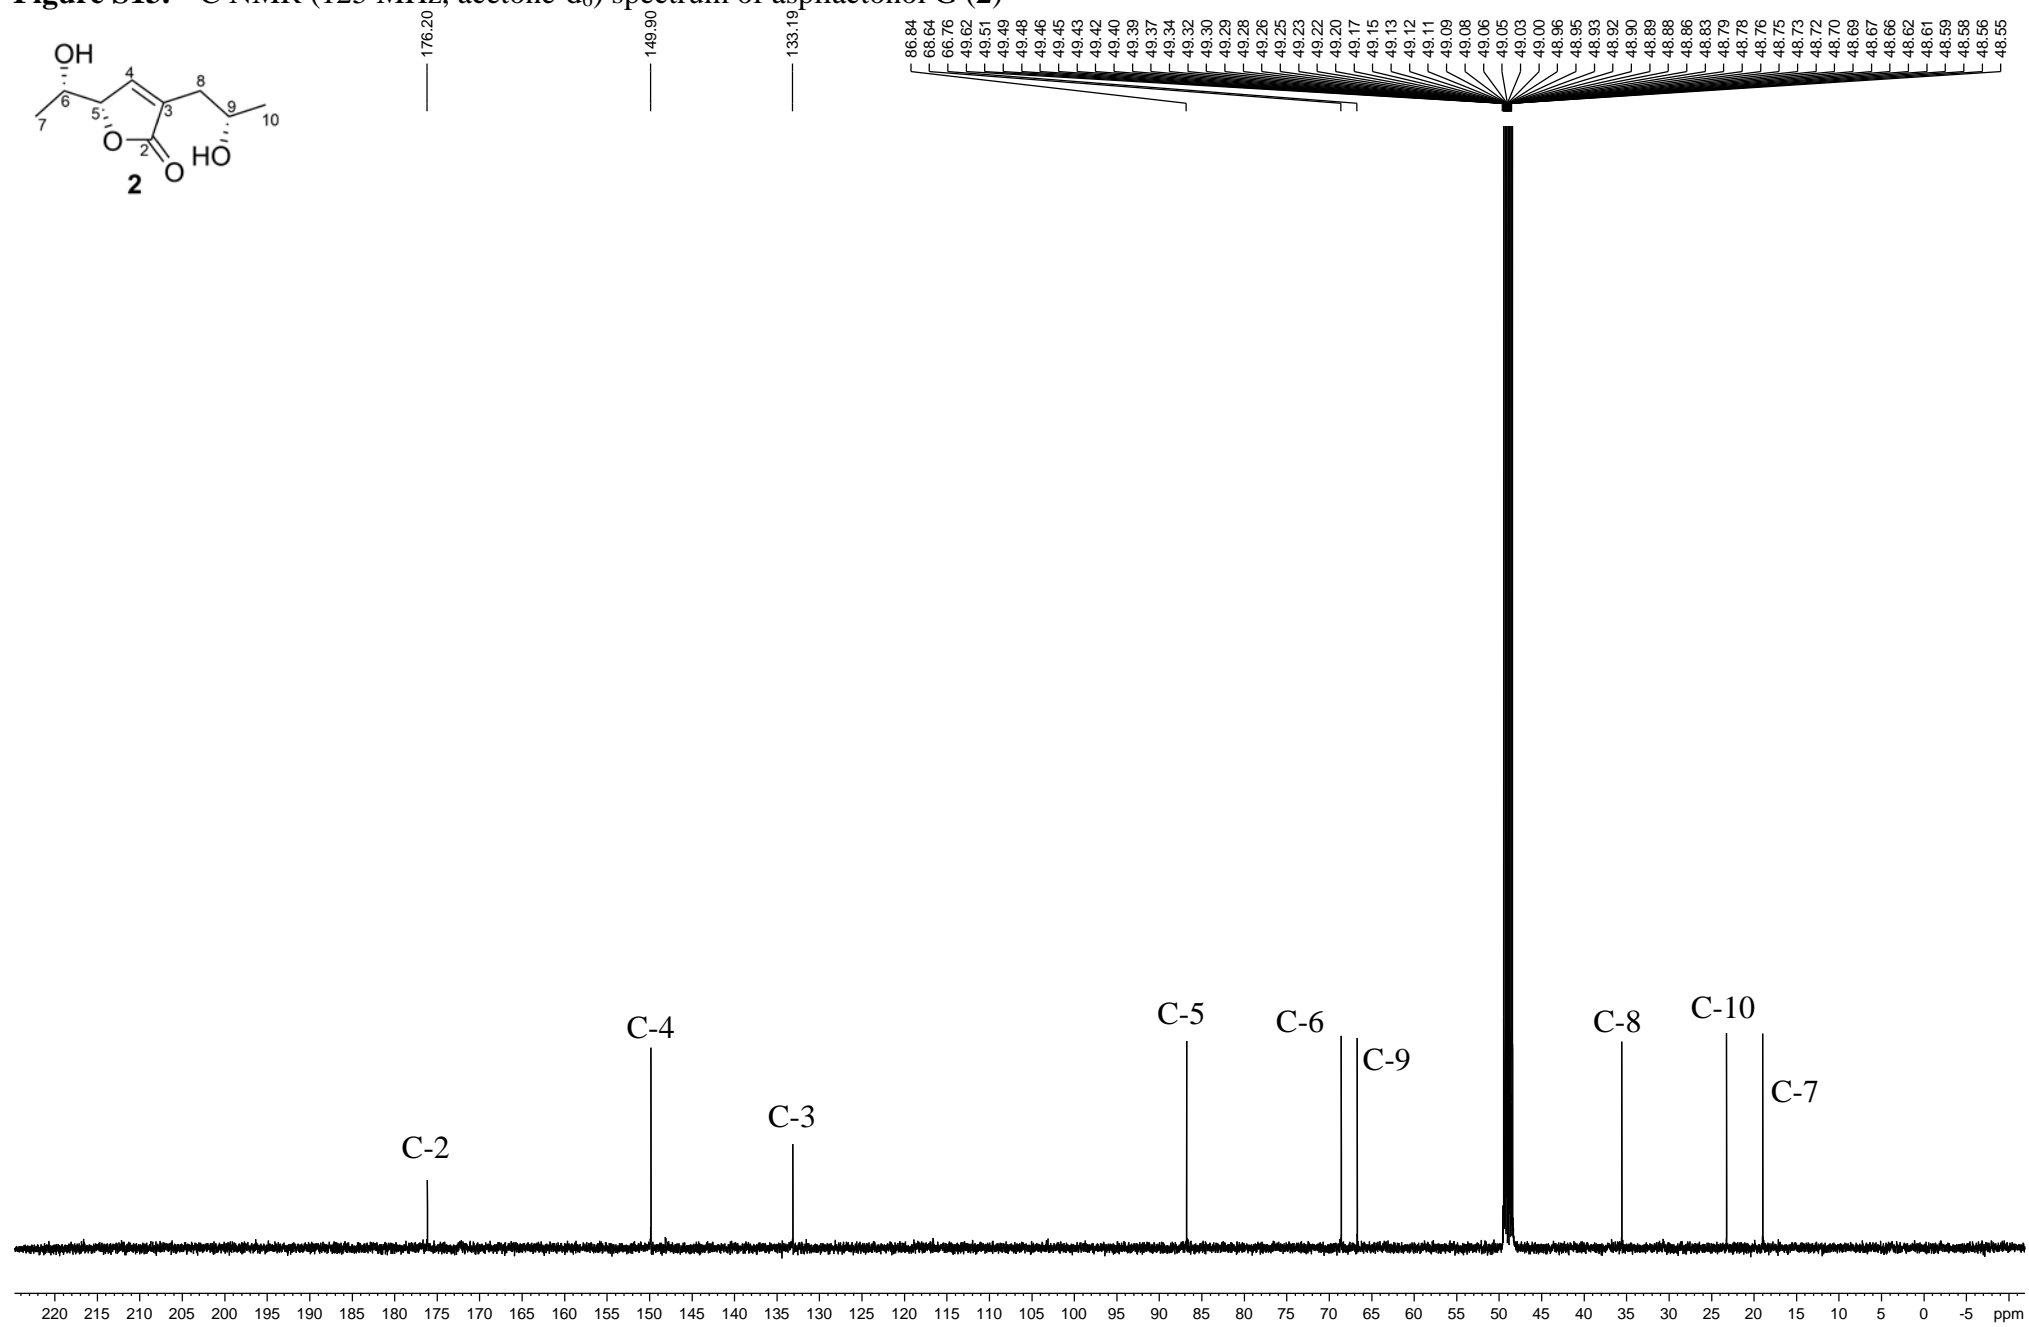



**Figure S14.**  $^1\text{H}$ - $^1\text{H}$  COSY (700 MHz, acetone- $d_6$ ) spectrum of aspilactonol G (2)

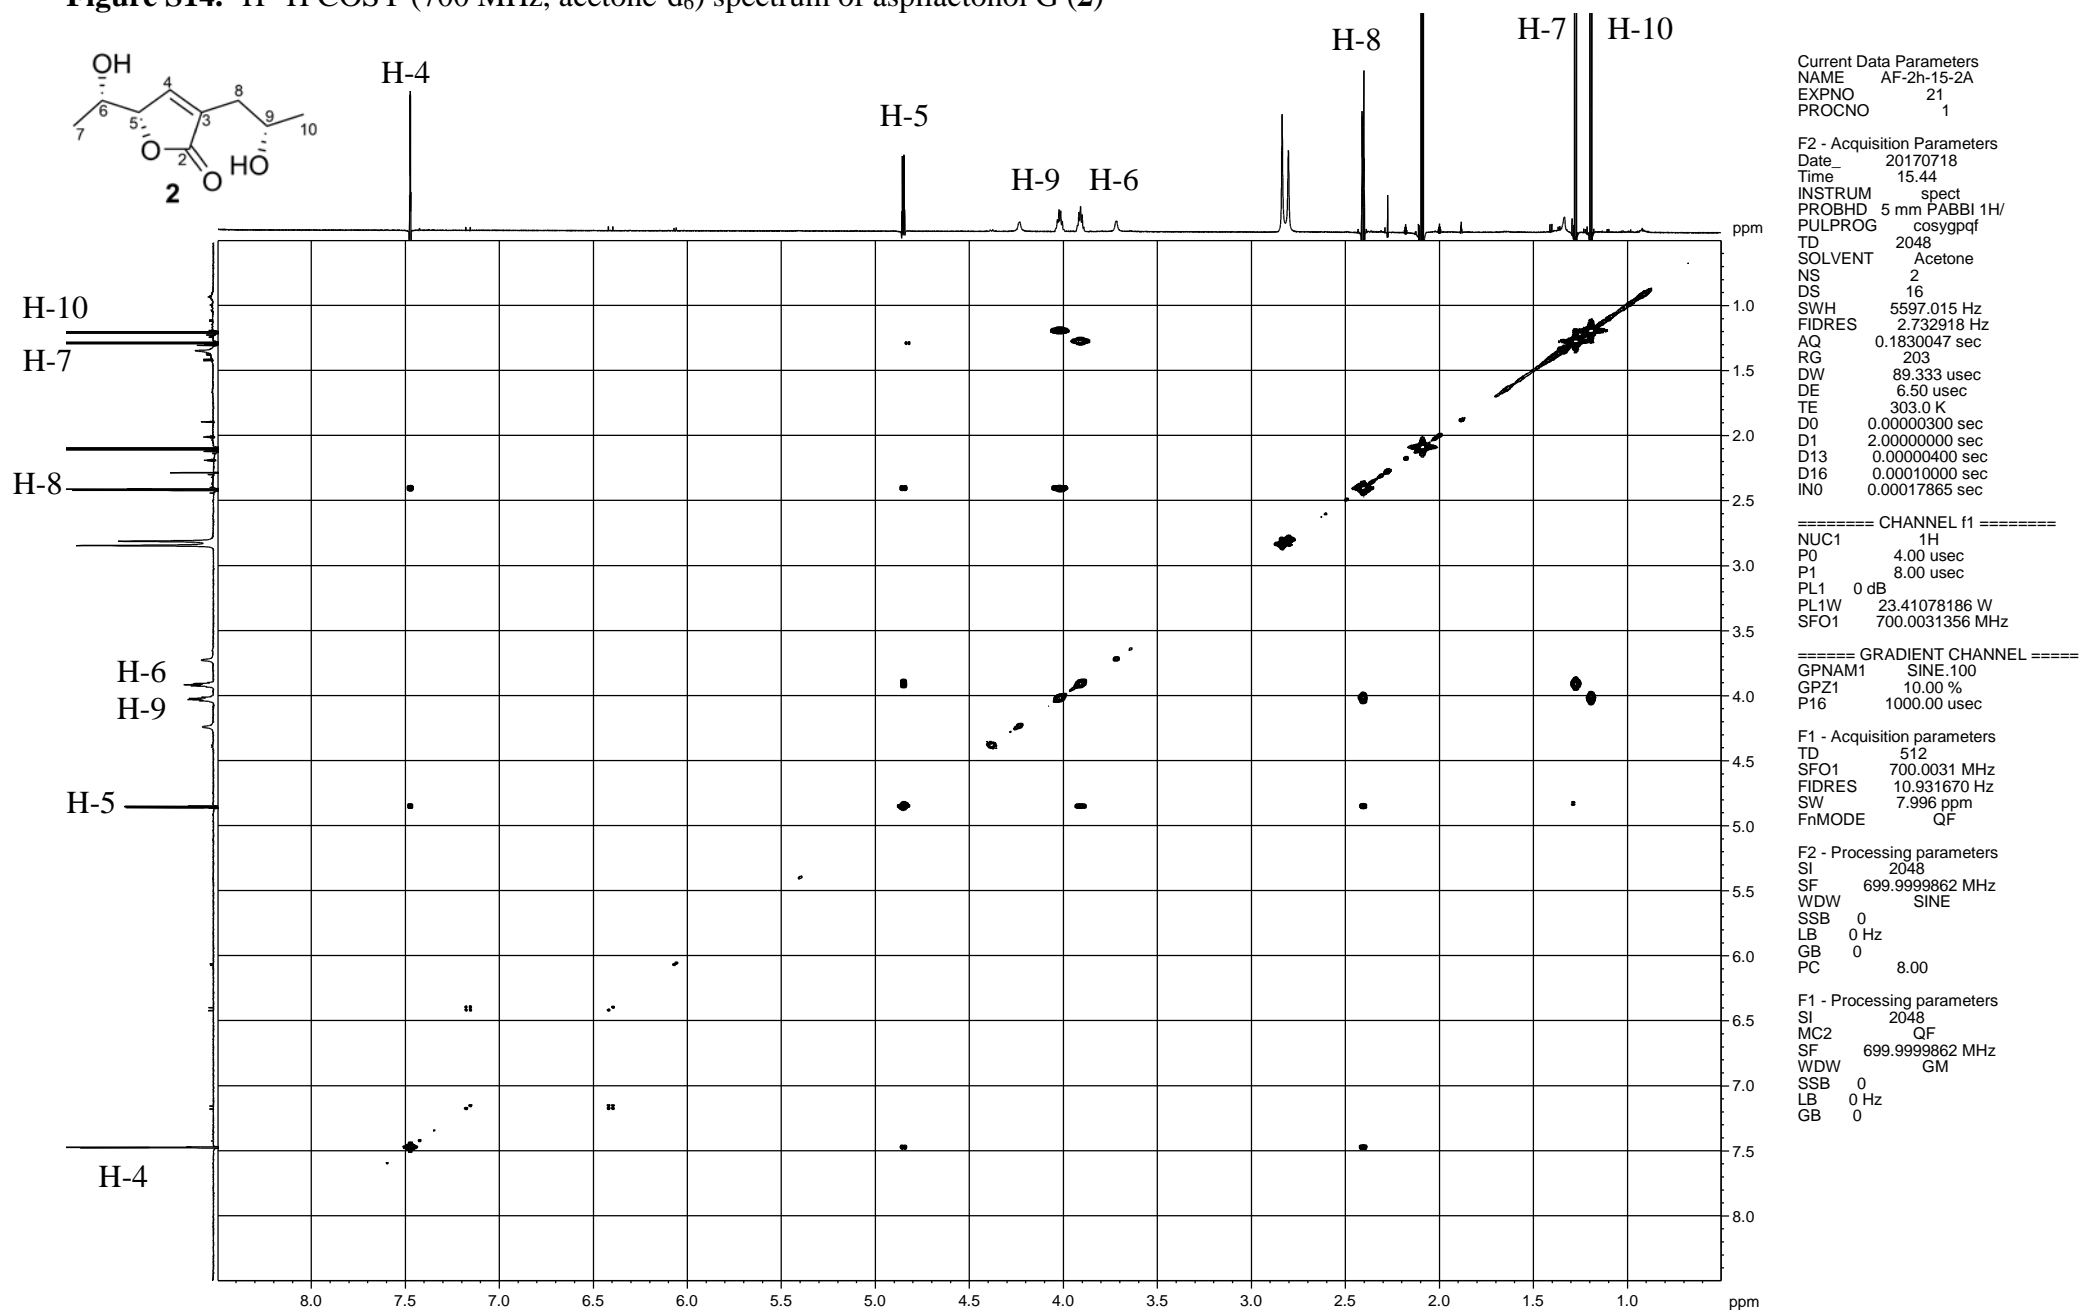

Figure S15. HSQC (700 MHz, acetone-d<sub>6</sub>) spectrum of aspilactonol G (2)

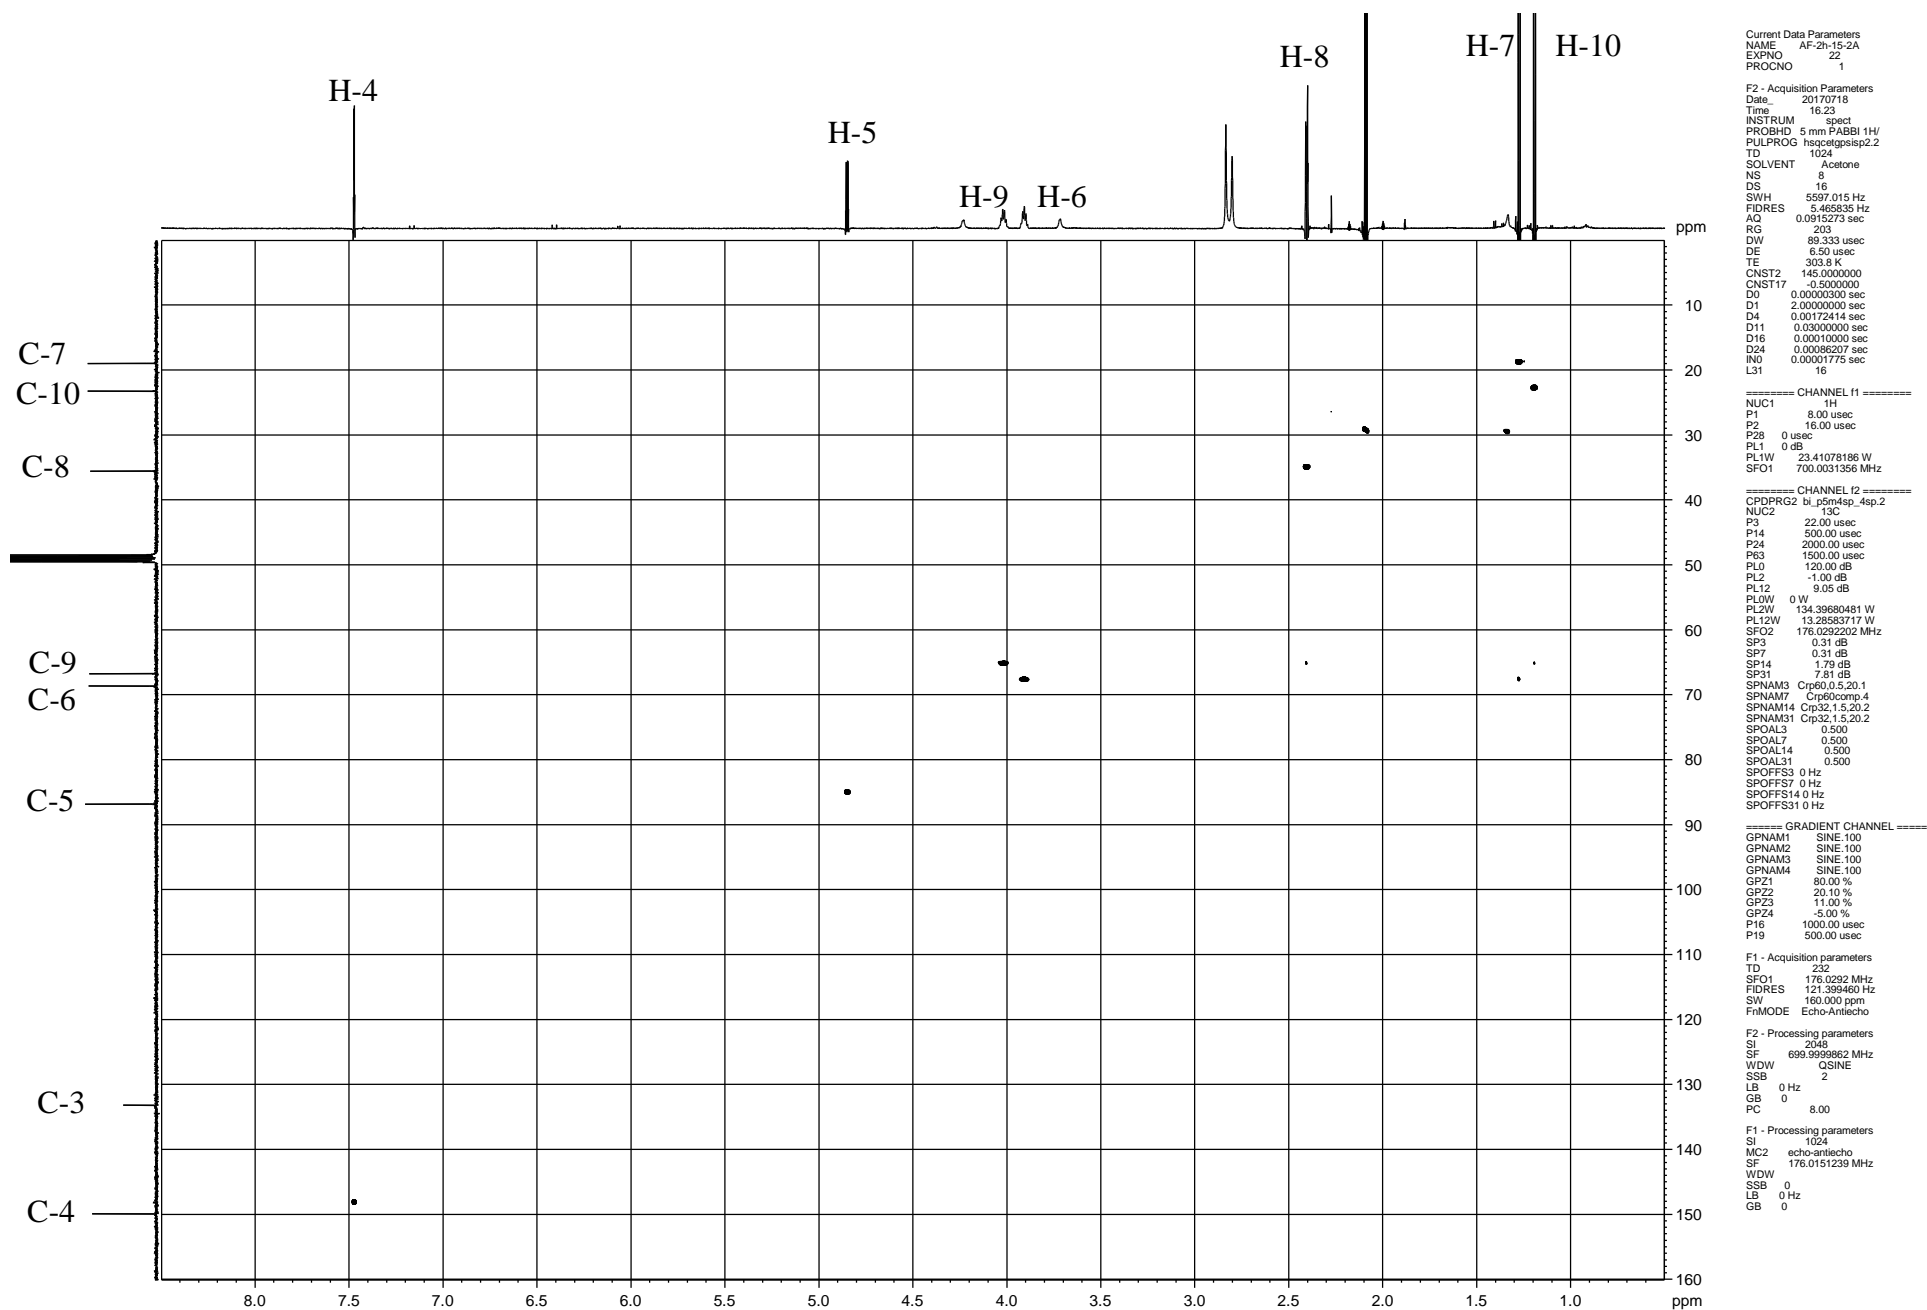

**Figure S16.** HMBC (700 MHz, acetone-d<sub>6</sub>) spectrum of aspilactonol G (2)

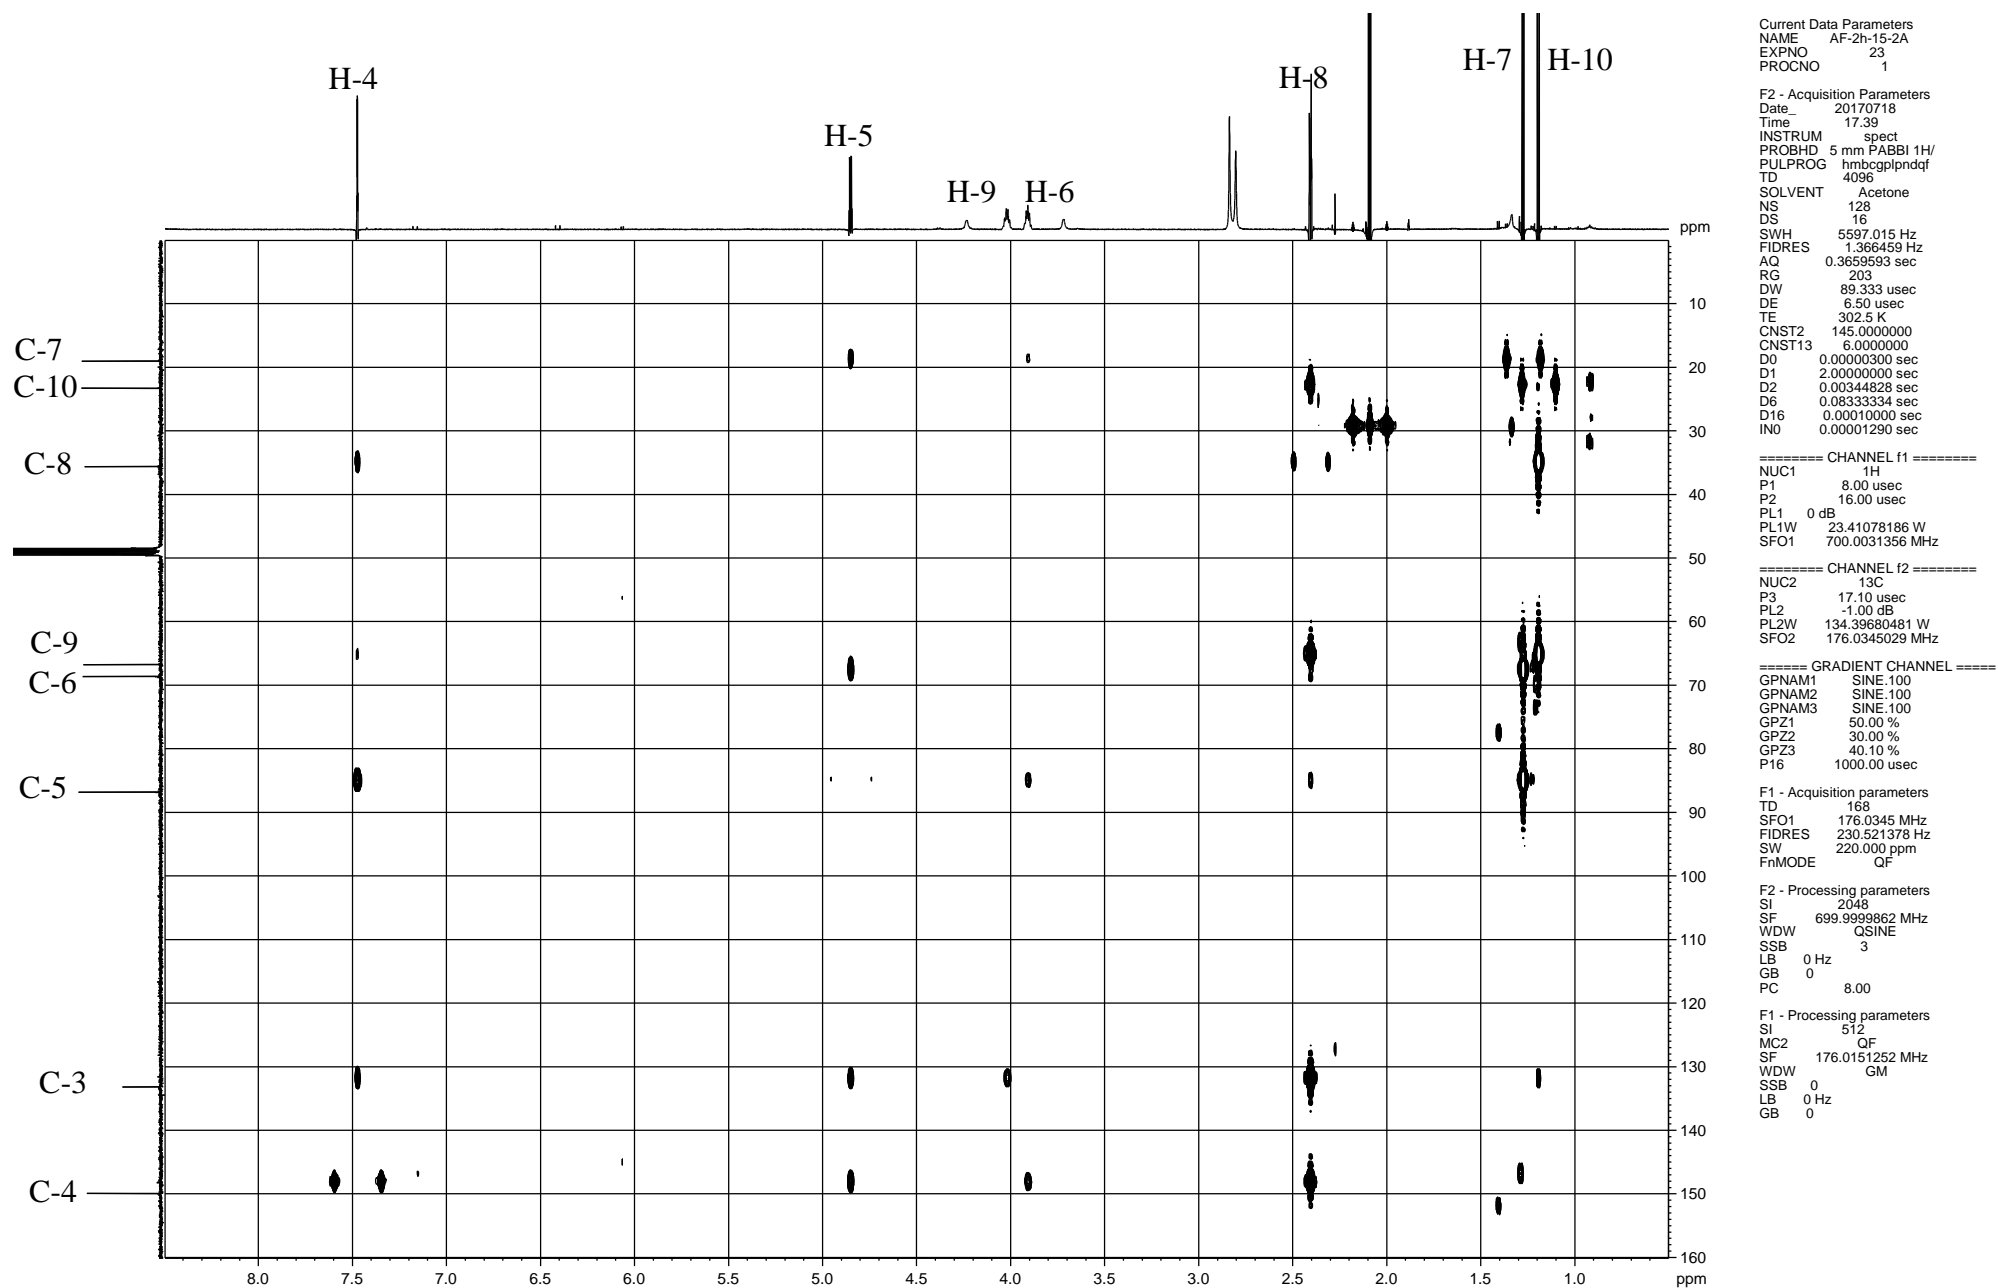

**Figure S17.** ECD spectrum of aspilactonol G (**2**) in methanol

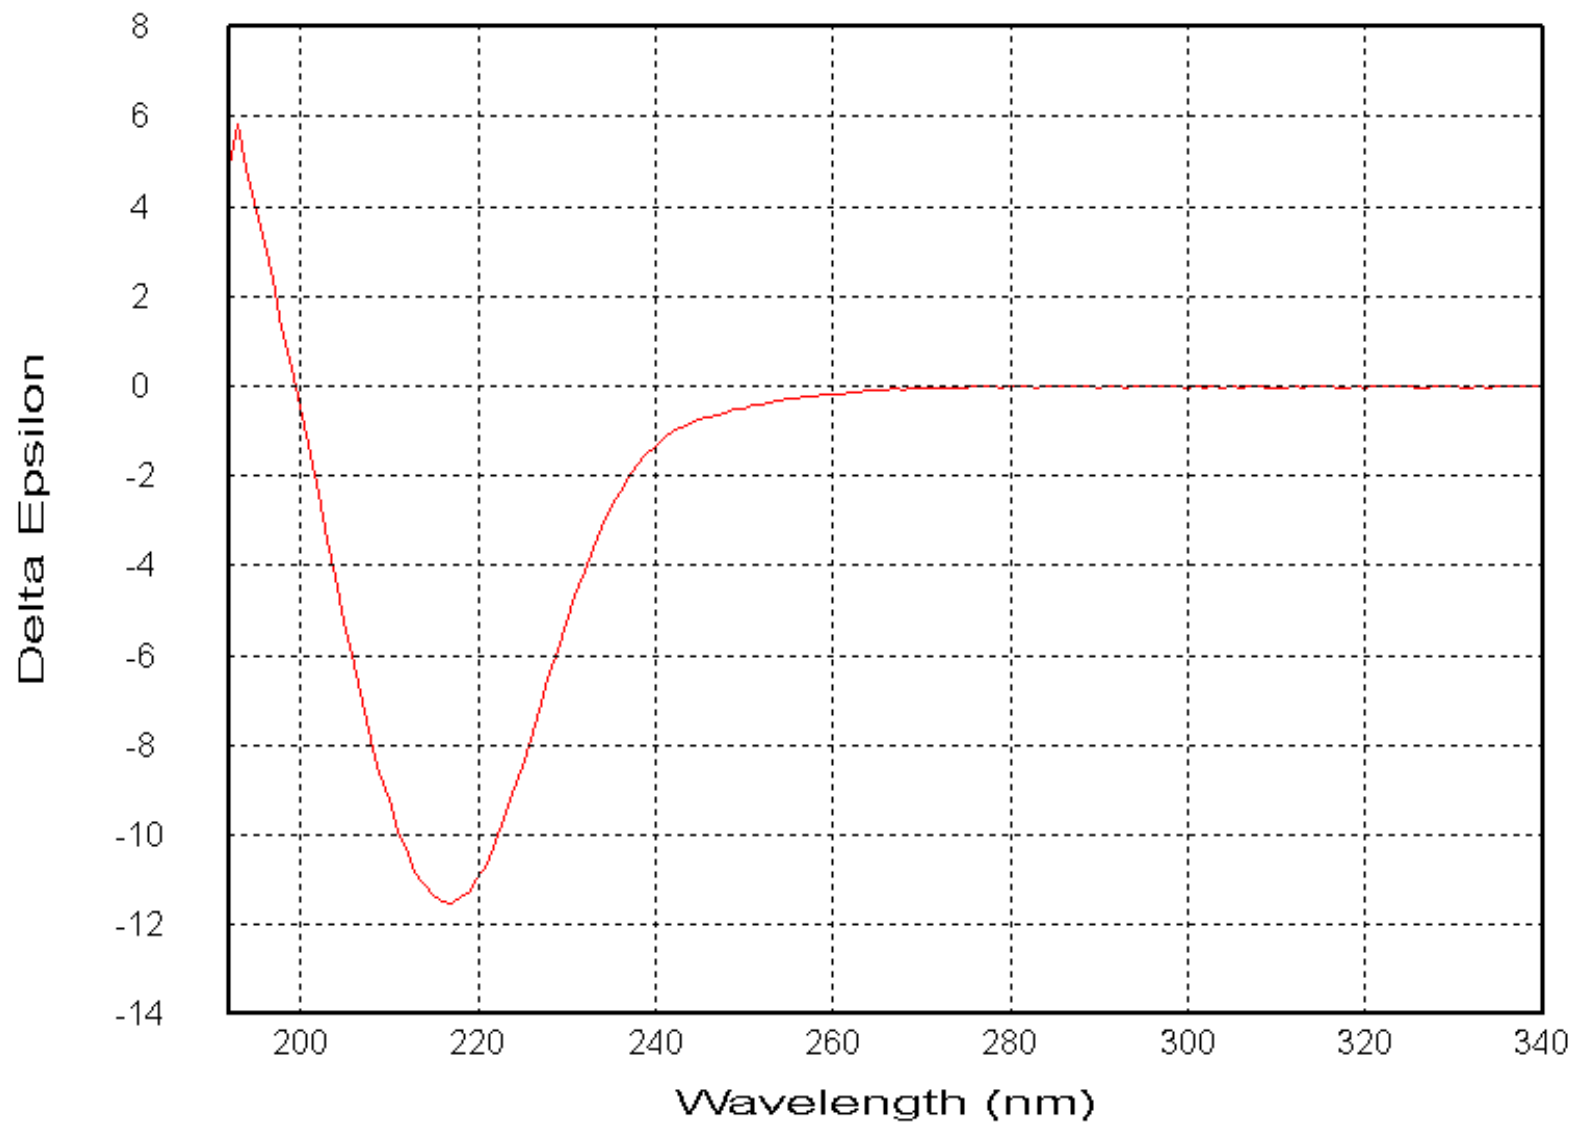

**Figure S18.**  $^1\text{H}$  NMR (500 MHz,  $\text{CDCl}_3$ ) spectrum of dihydroaspirone (**3**)

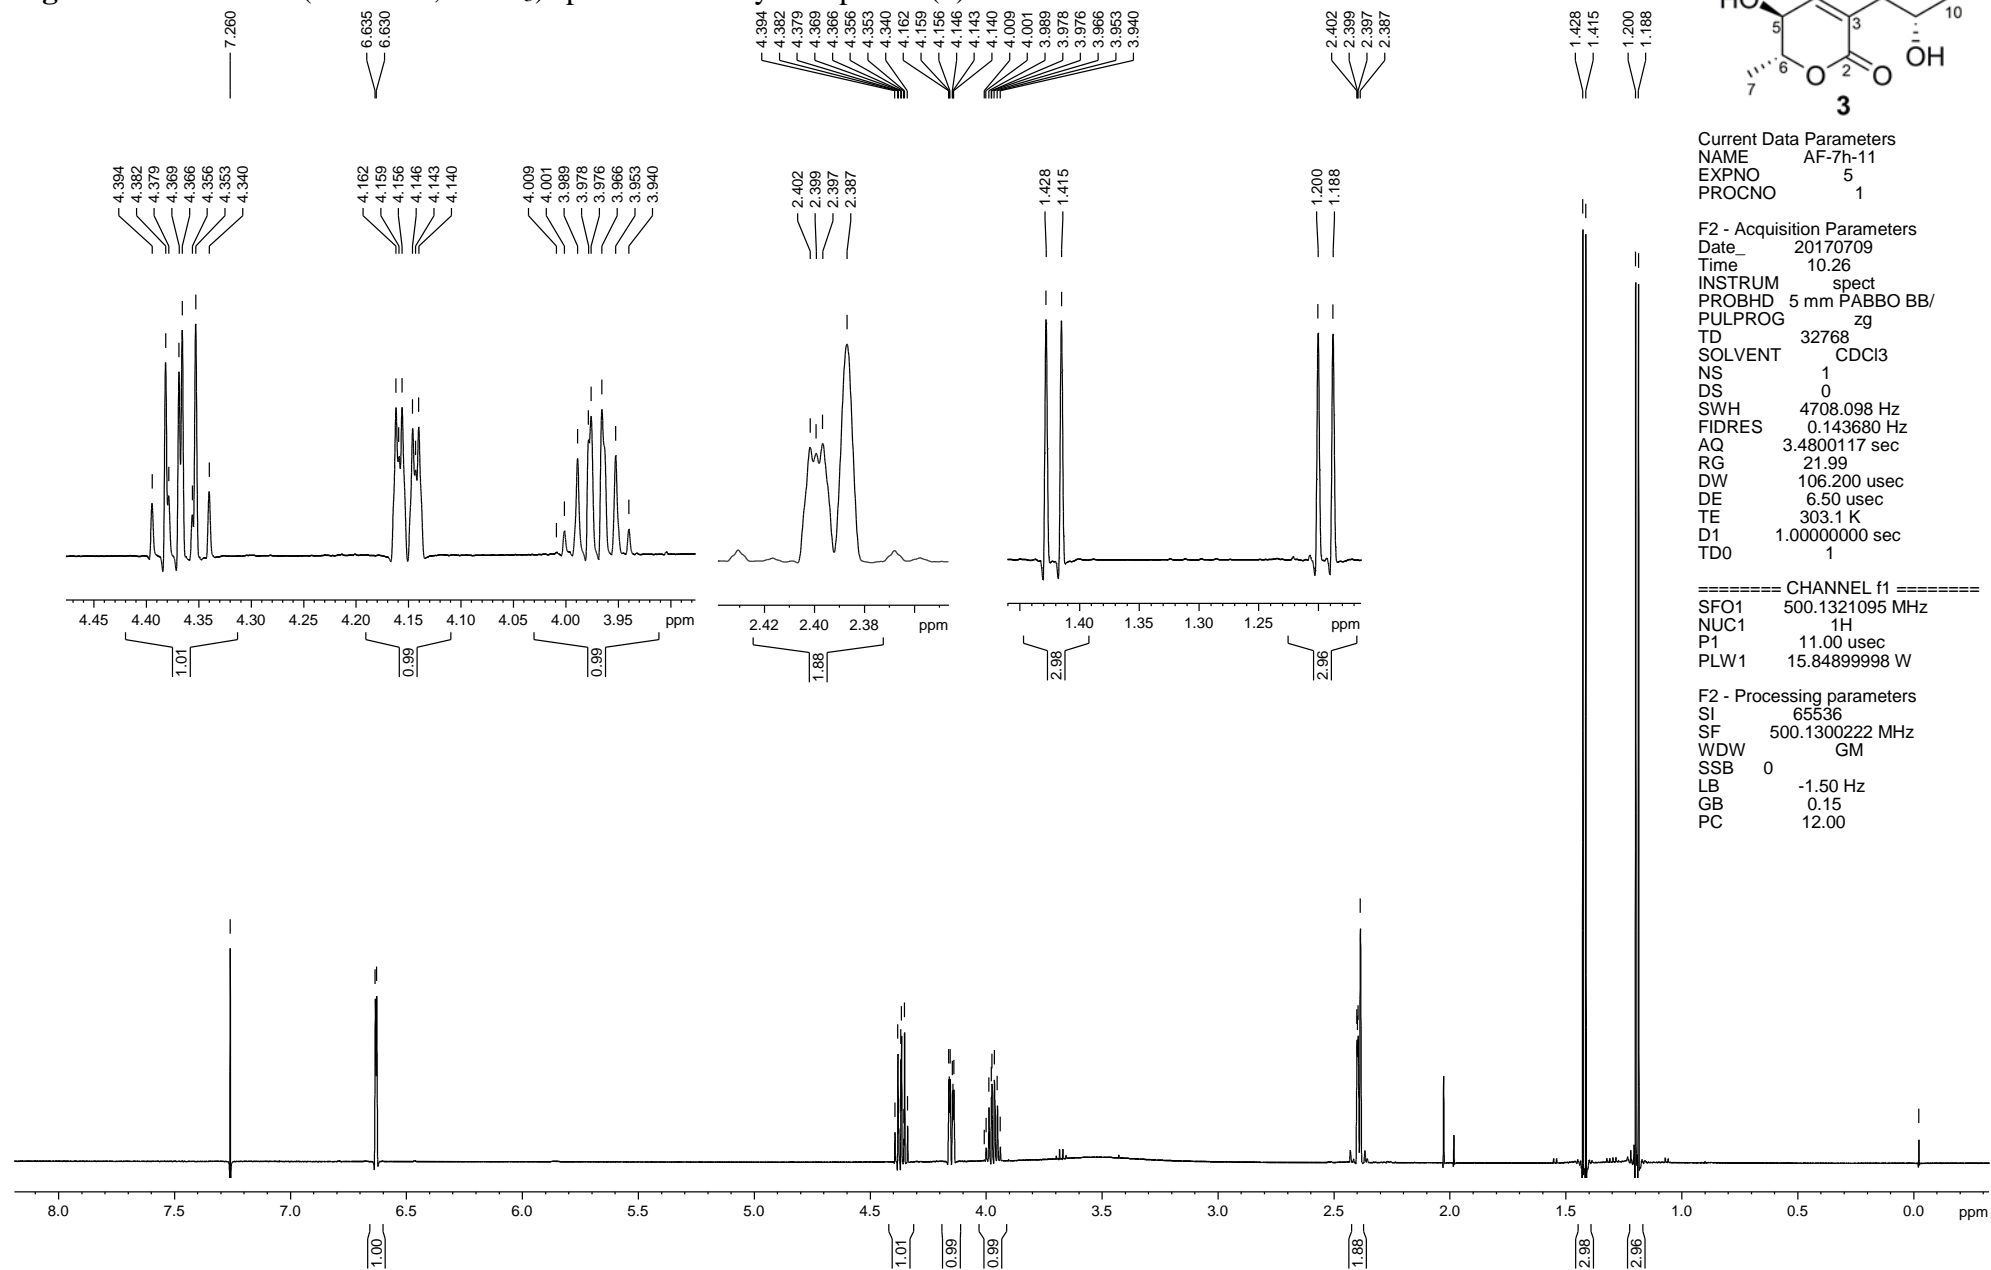

**Figure S19.**  $^{13}\text{C}$  NMR (176 MHz,  $\text{CDCl}_3$ ) spectrum of dihydrospirone (**3**)

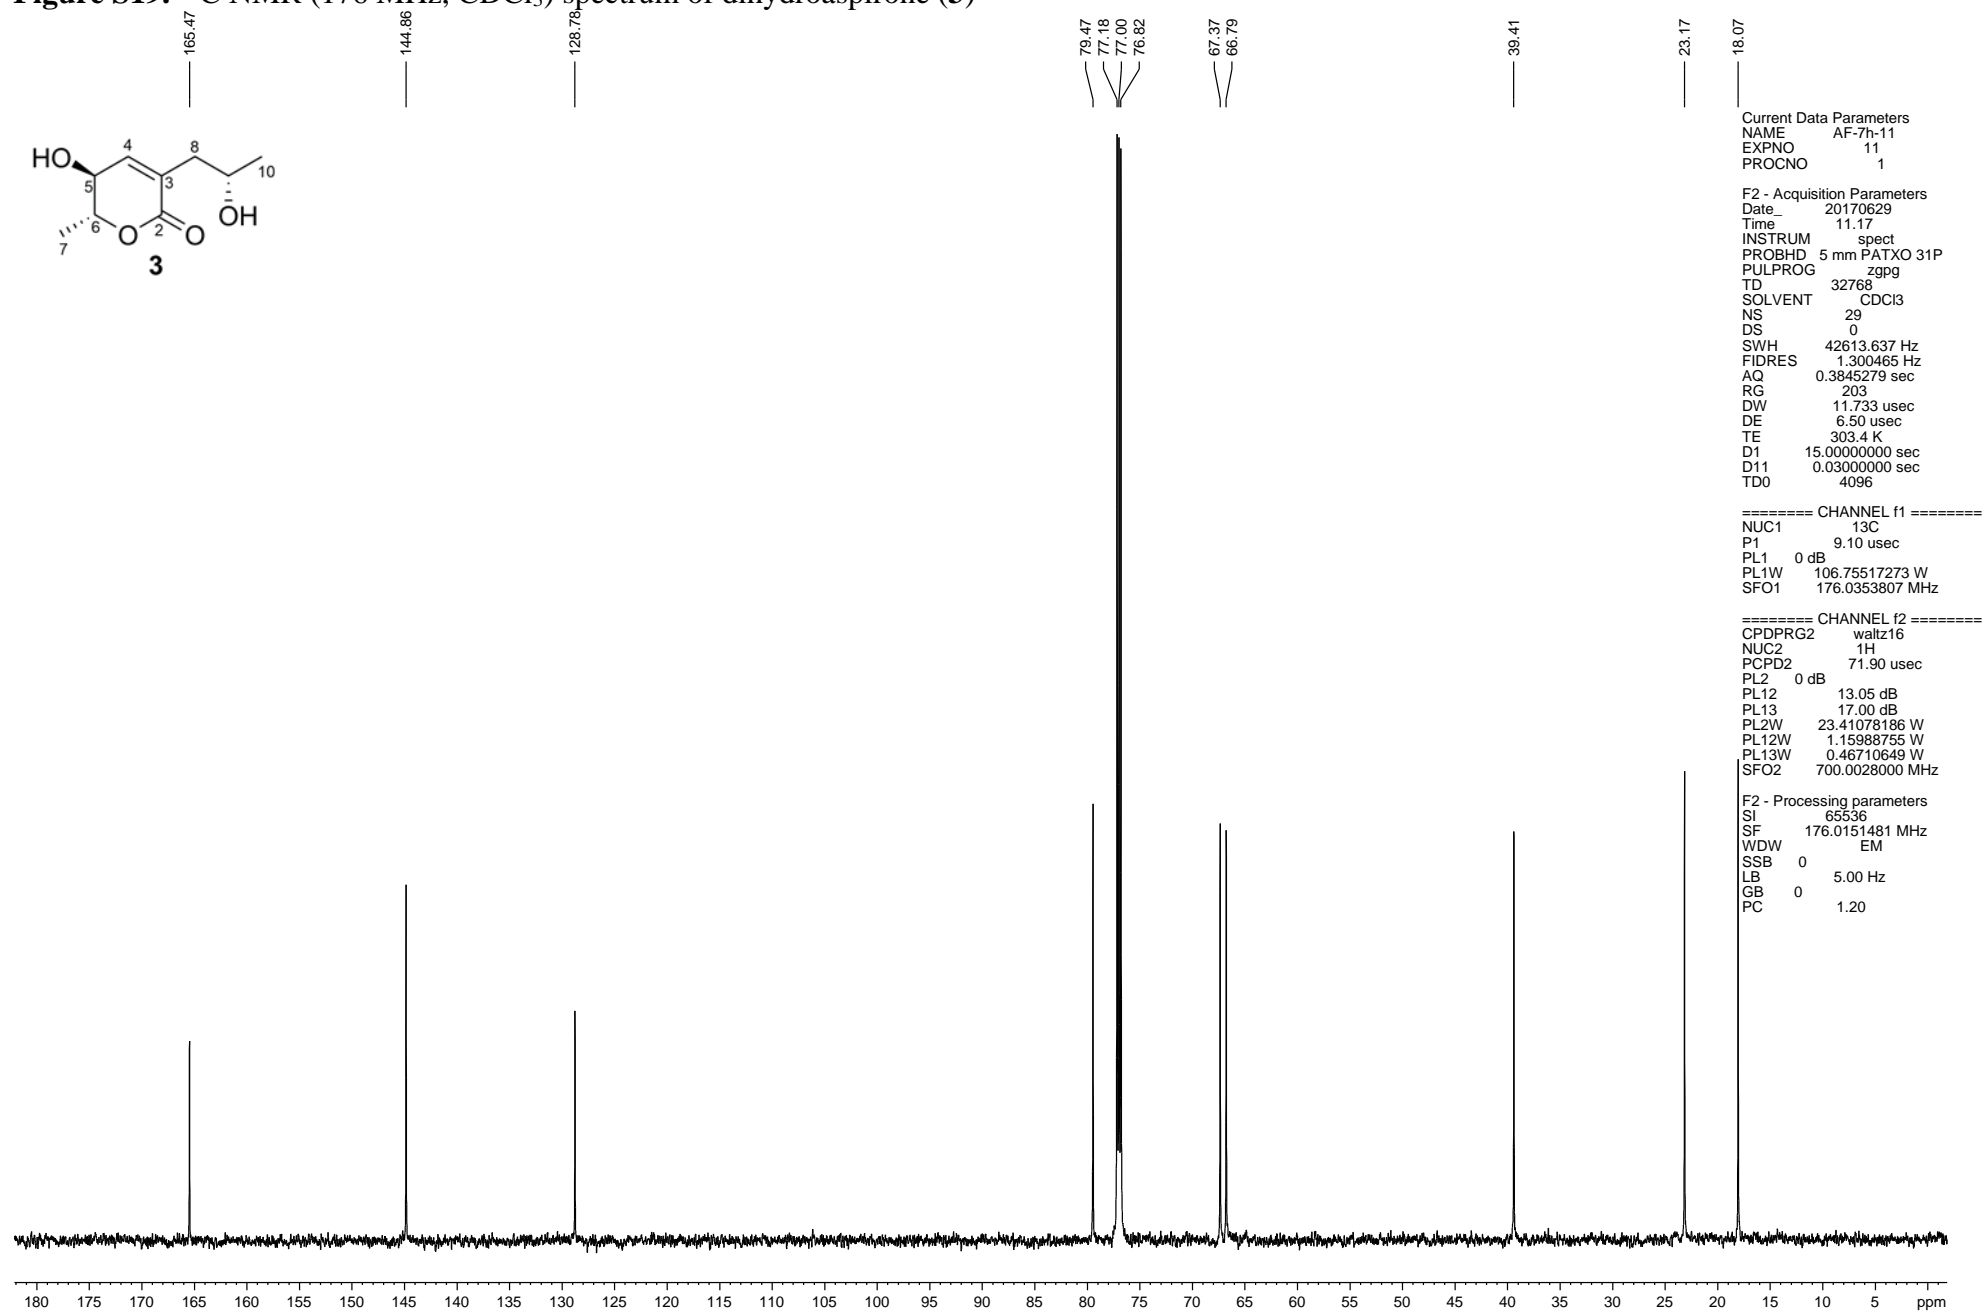

Figure S20. <sup>1</sup>H NMR (500 MHz, CDCl<sub>3</sub>) spectrum of 12-*epi*-aspartetranone D (**4**)

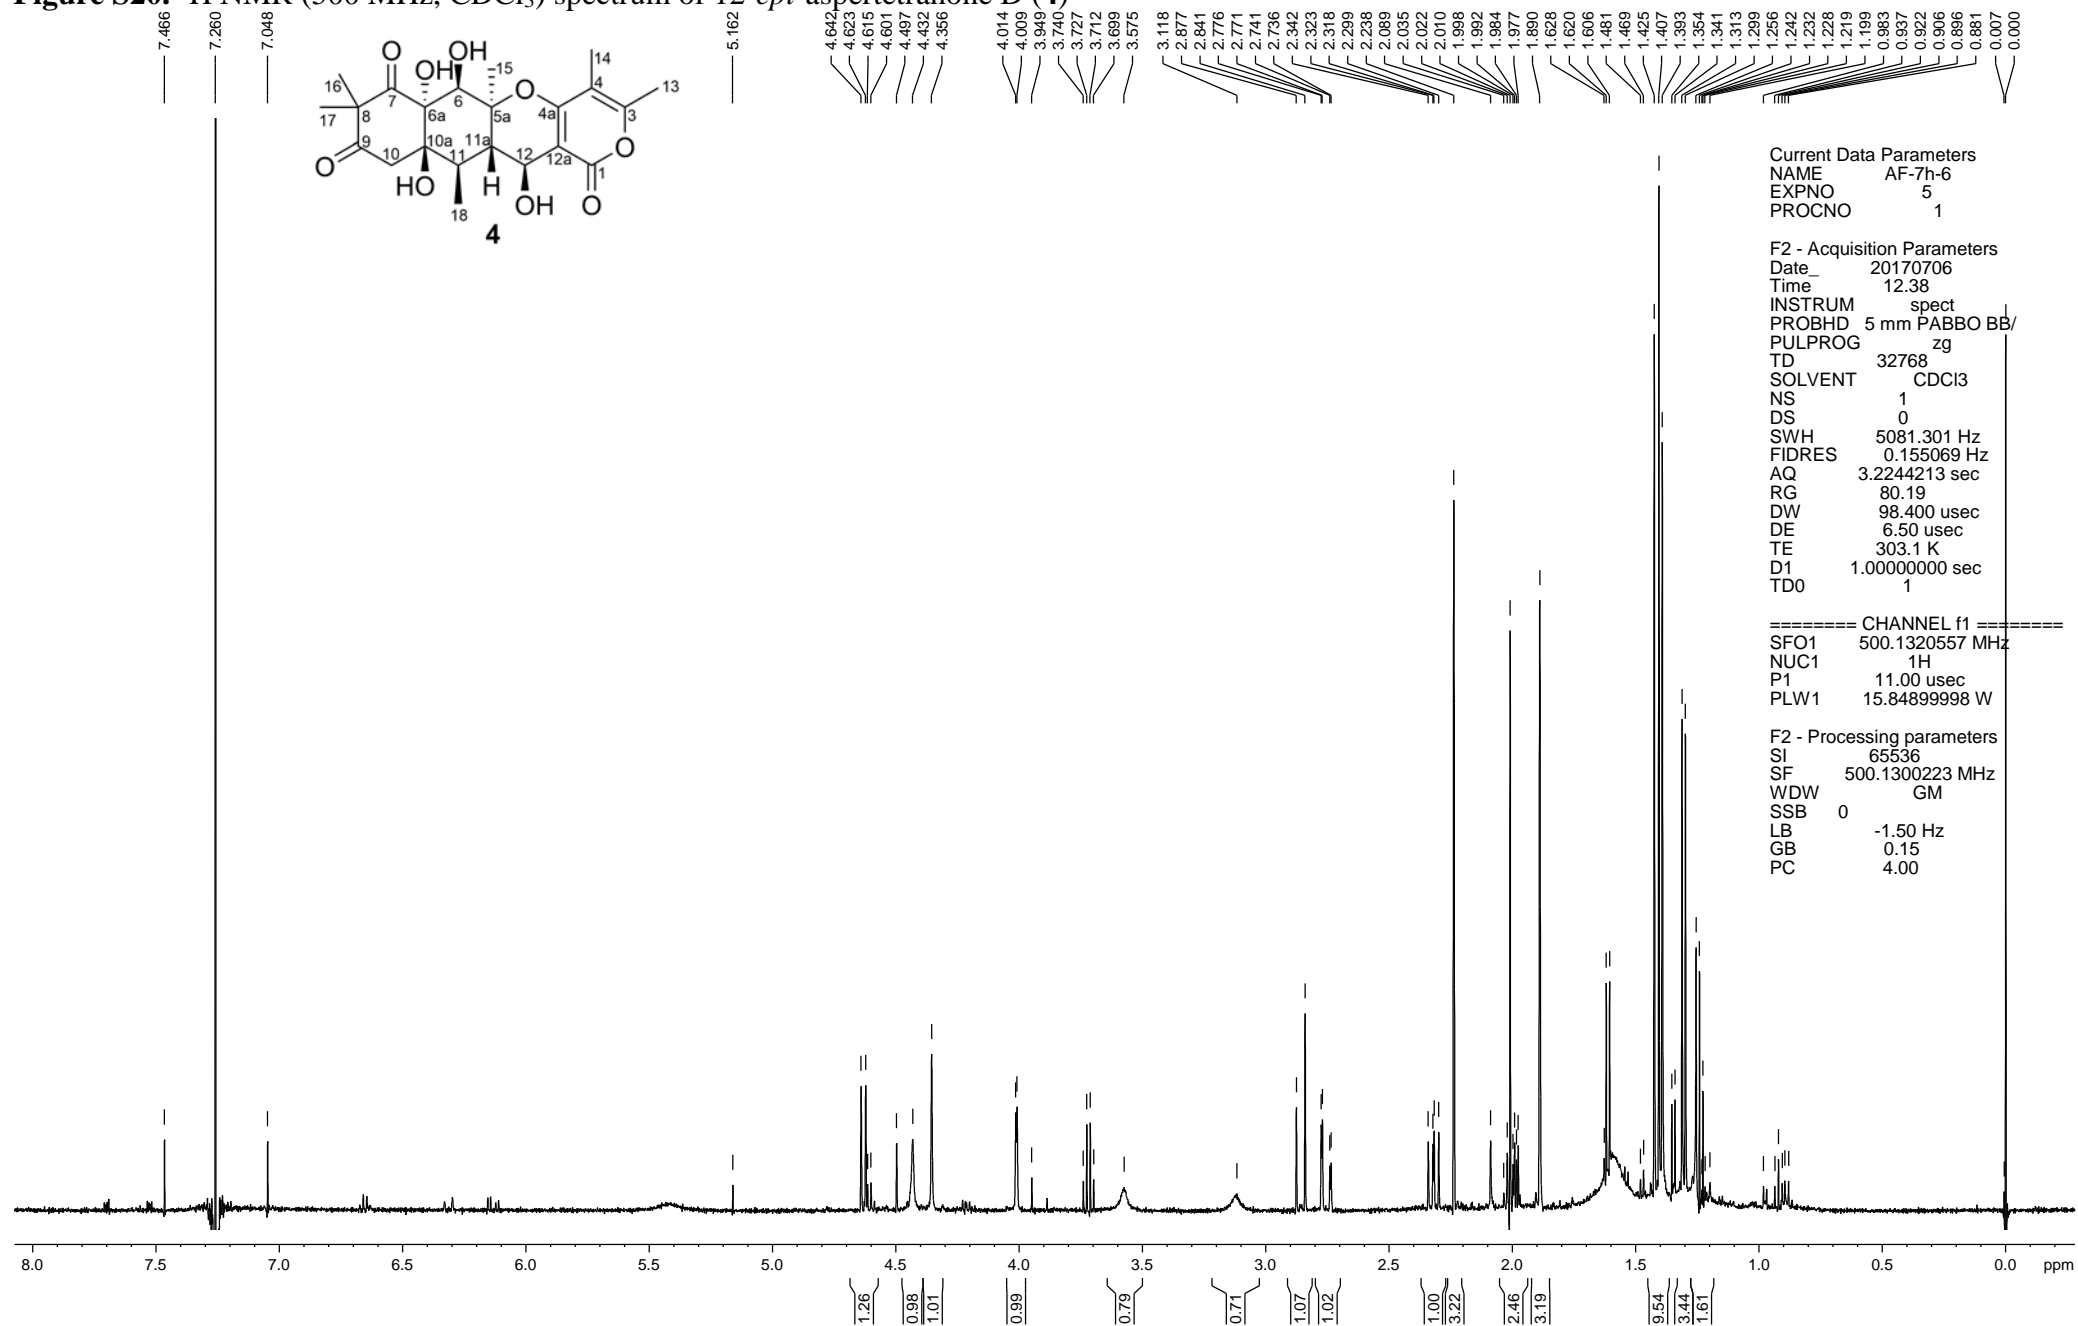

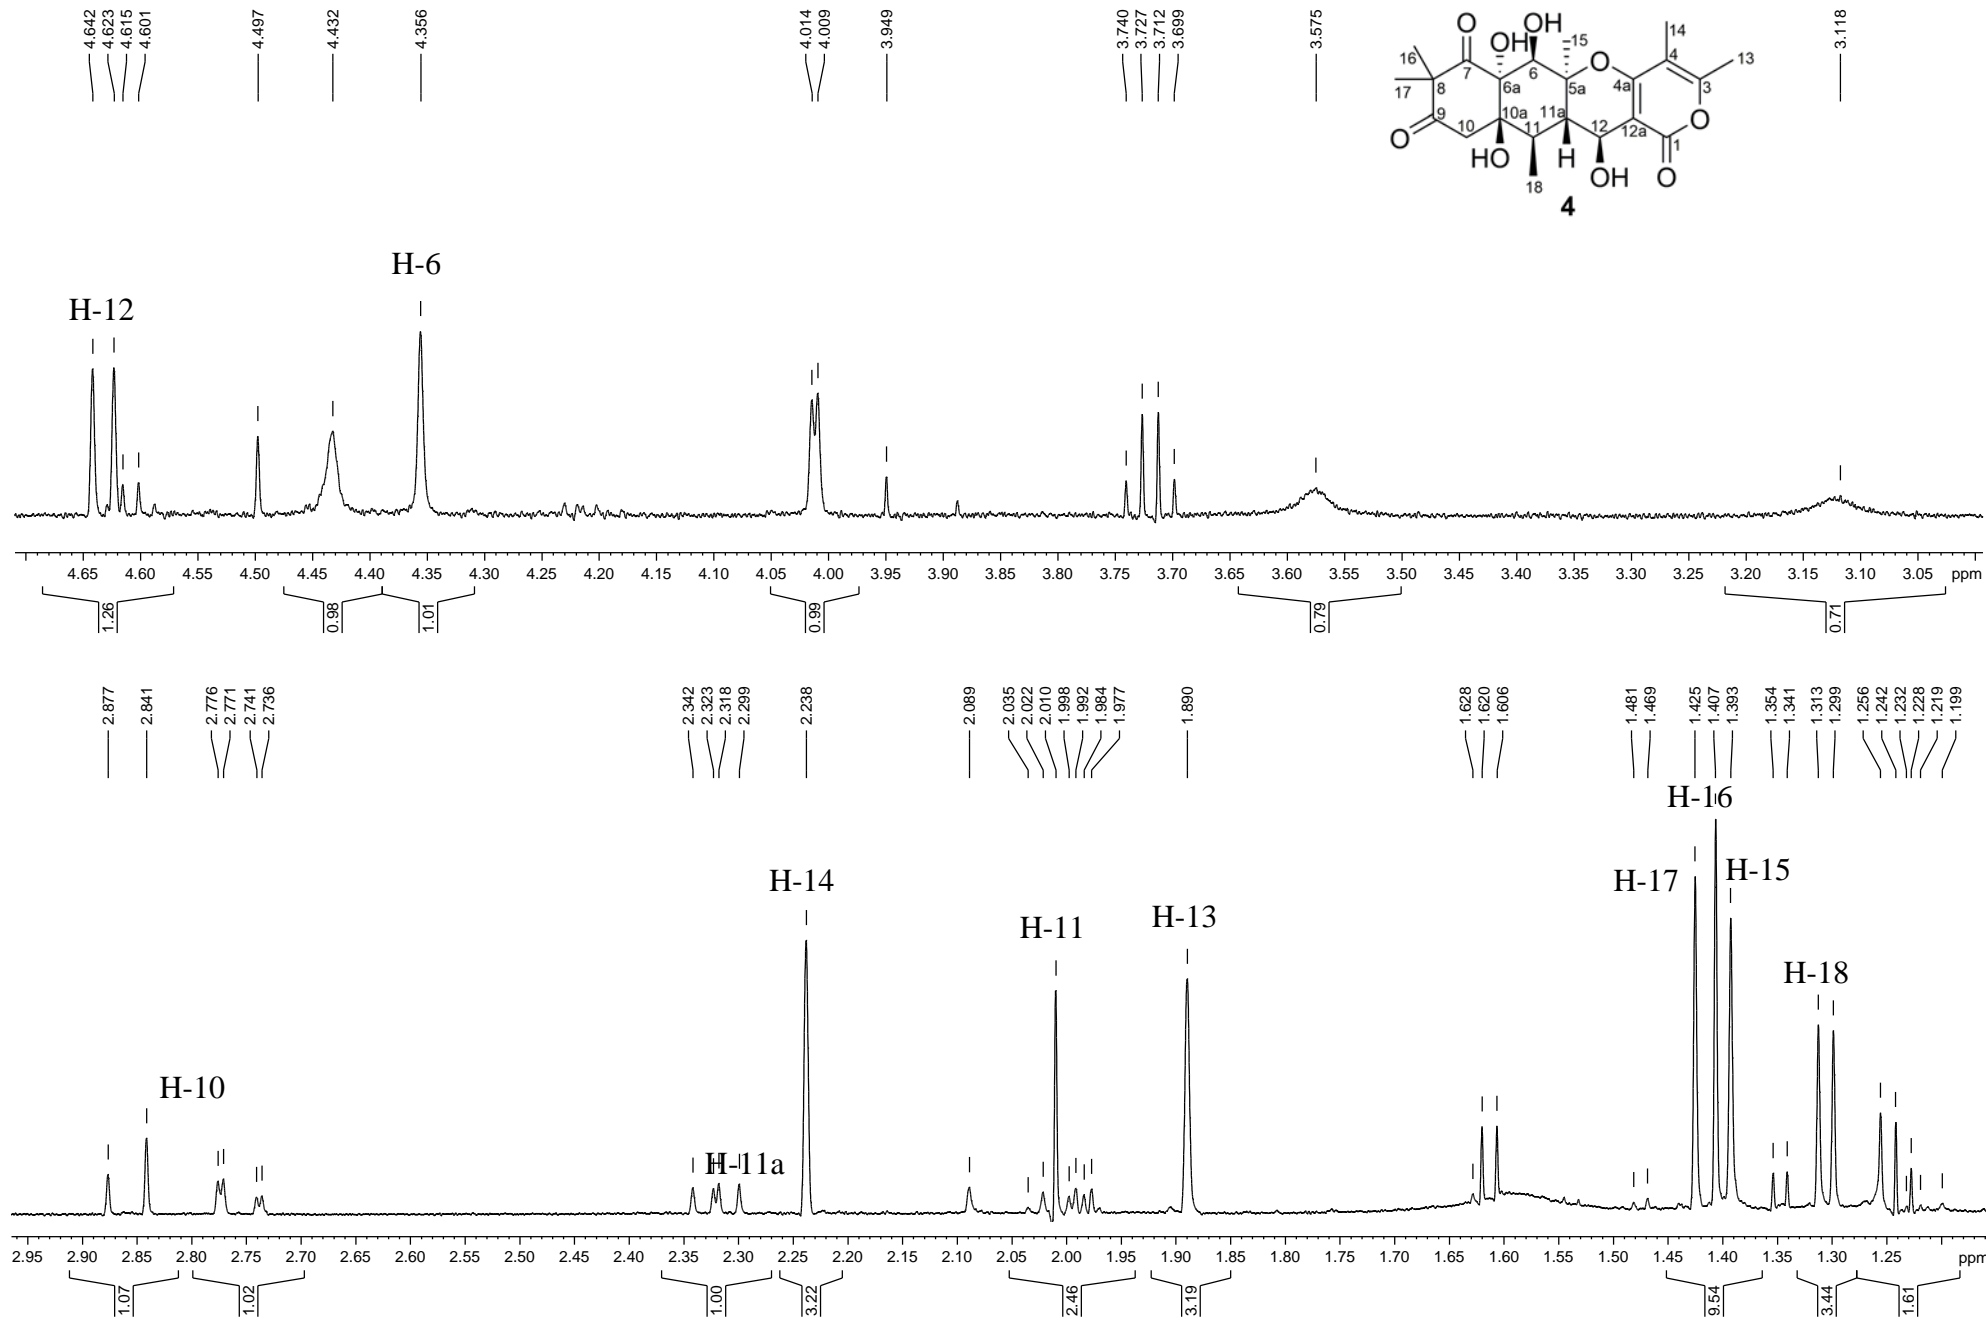



**Figure S21.**  $^{13}\text{C}$  NMR (176 MHz,  $\text{CDCl}_3$ ) spectrum of 12-*epi*-aspartetranone D (**4**)

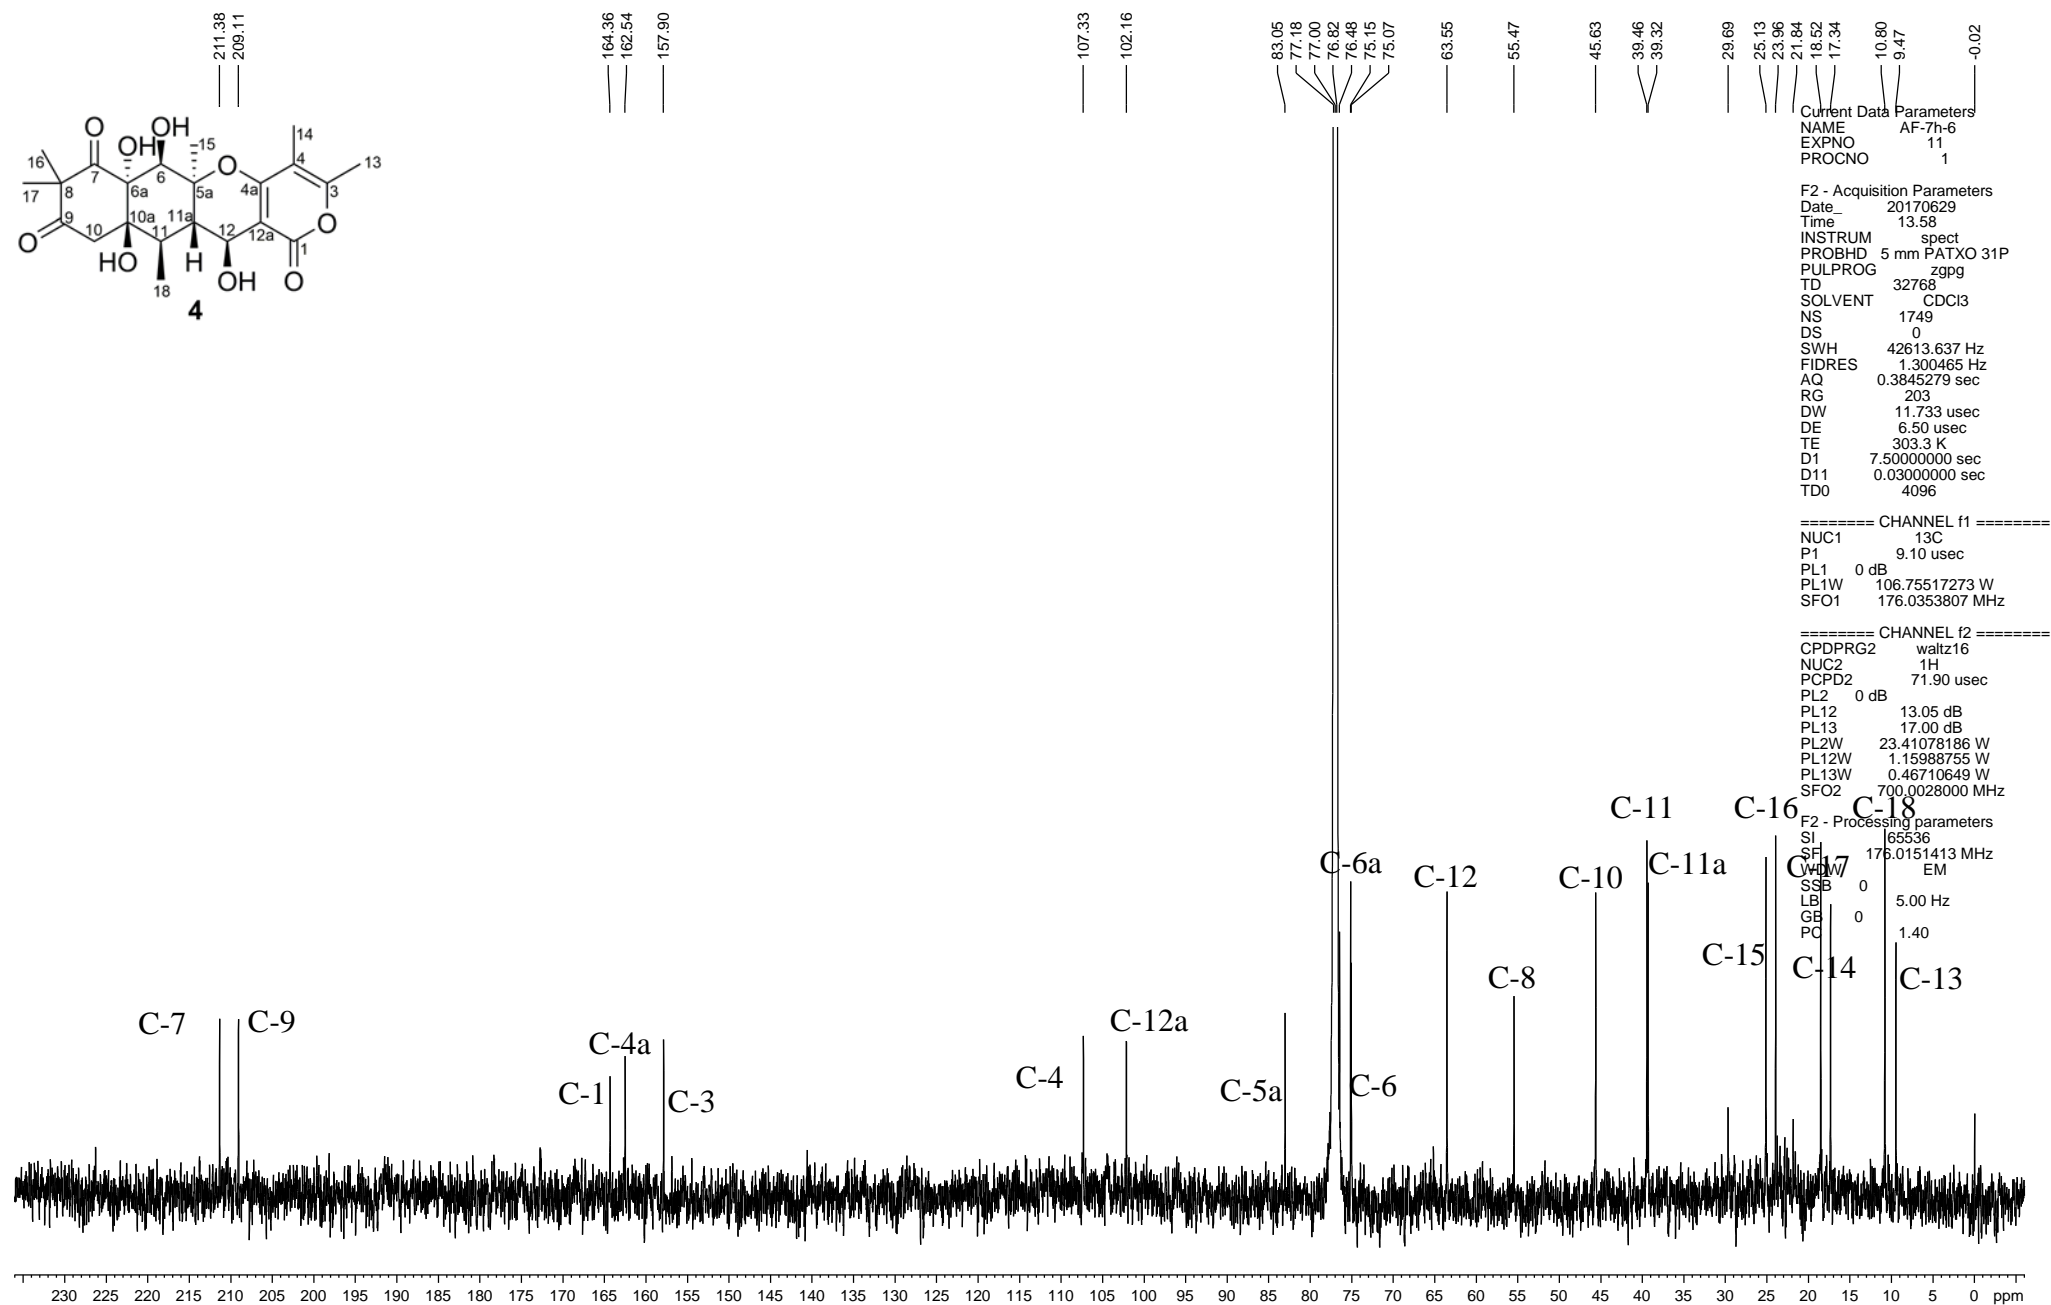

**Figure S22.** DEPT-135 (500 MHz, CDCl<sub>3</sub>) spectrum of 12-*epi*-aspertetranone D (**4**)

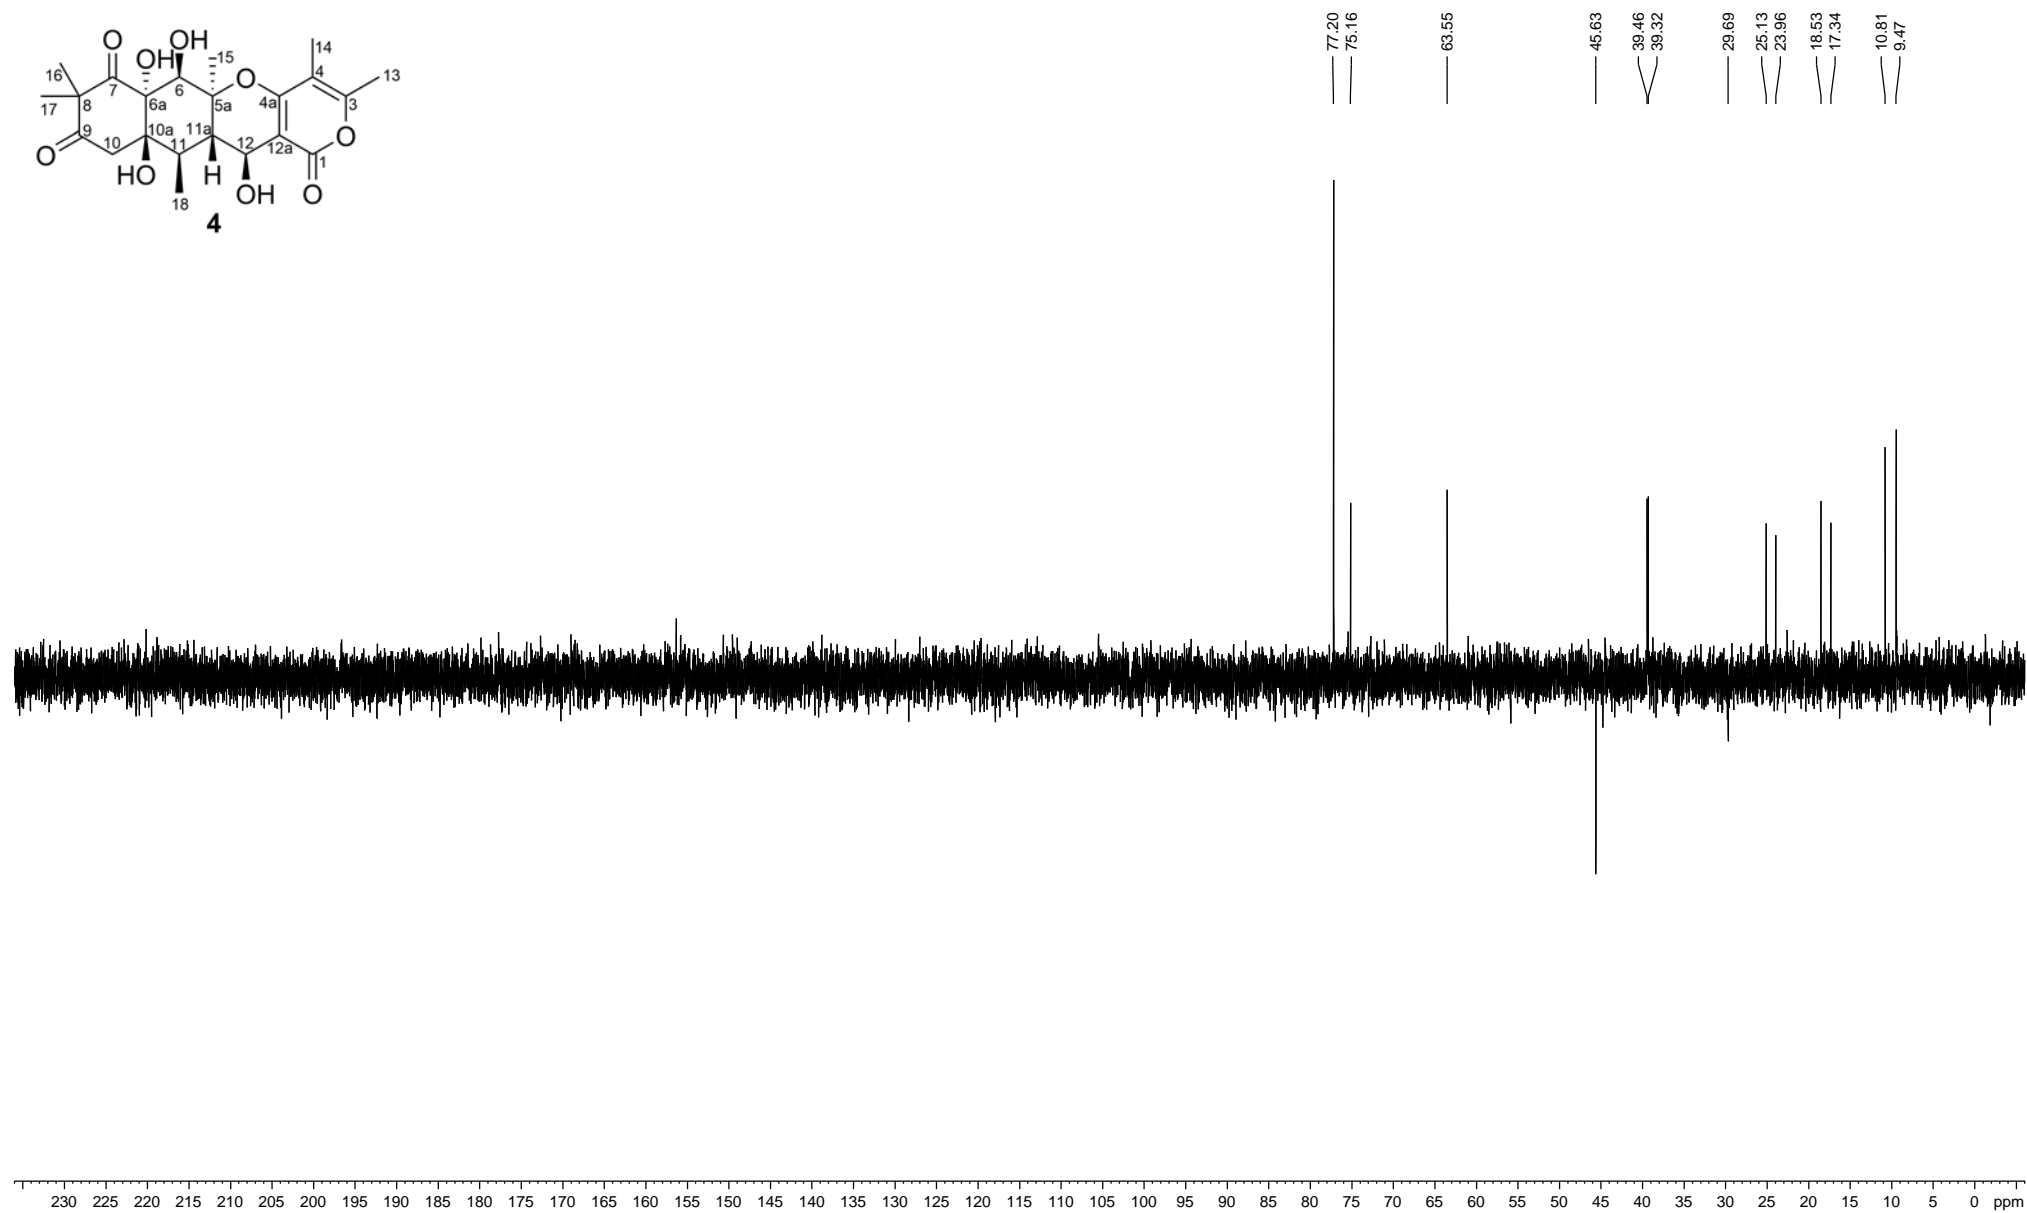

Figure S23.  $^1\text{H}$ - $^1\text{H}$  COSY (500 MHz,  $\text{CDCl}_3$ ) spectrum of 12-*epi*-aspartetranone D (4)

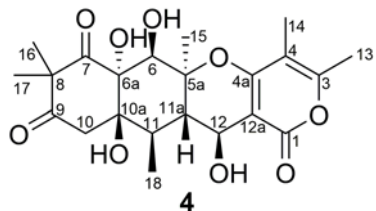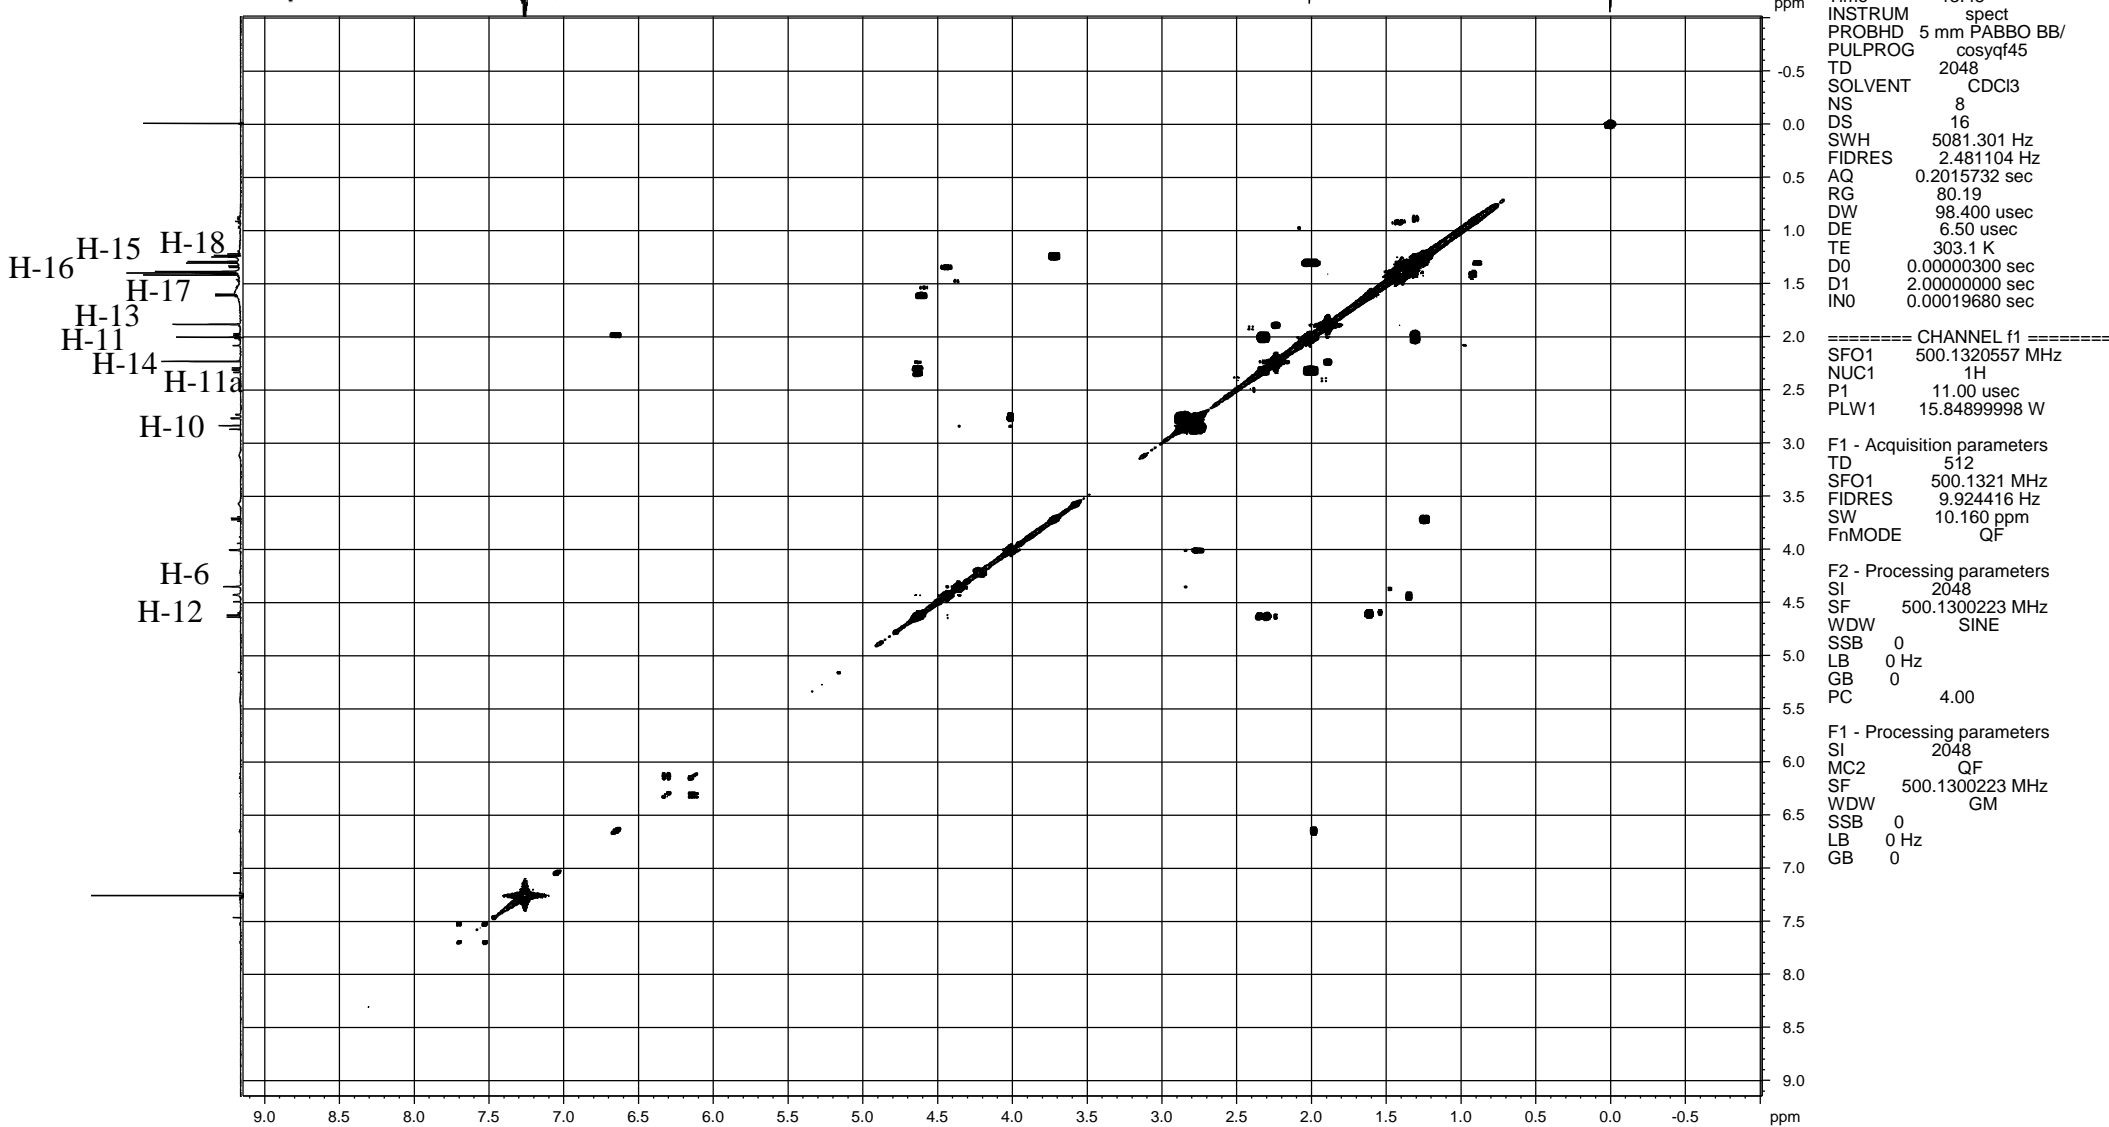

Current Data Parameters  
 NAME AF-7h-6  
 EXPNO 21  
 PROCNO 1

F2 - Acquisition Parameters  
 Date\_ 20170706  
 Time 13.48  
 INSTRUM spect  
 PROBHD 5 mm PABBO BB/  
 PULPROG cosyqf45  
 TD 2048  
 SOLVENT  $\text{CDCl}_3$   
 NS 8  
 DS 16  
 SWH 5081.301 Hz  
 FIDRES 2.481104 Hz  
 AQ 0.2015732 sec  
 RG 80.19  
 DW 98.400 usec  
 DE 6.50 usec  
 TE 303.1 K  
 D0 0.00000300 sec  
 D1 2.00000000 sec  
 IN0 0.00019680 sec

===== CHANNEL f1 =====  
 SFO1 500.1320557 MHz  
 NUC1  $^1\text{H}$   
 P1 11.00 usec  
 PLW1 15.84899998 W

F1 - Acquisition parameters  
 TD 512  
 SFO1 500.1321 MHz  
 FIDRES 9.924416 Hz  
 SW 10.160 ppm  
 FMODE QF

F2 - Processing parameters  
 SI 2048  
 SF 500.1300223 MHz  
 WDW SINE  
 SSB 0  
 LB 0 Hz  
 GB 0  
 PC 4.00

F1 - Processing parameters  
 SI 2048  
 MC2 QF  
 SF 500.1300223 MHz  
 WDW GM  
 SSB 0  
 LB 0 Hz  
 GB 0

Figure S24. HSQC (500 MHz, CDCl<sub>3</sub>) spectrum of 12-*epi*-aspartetranone D (**4**)

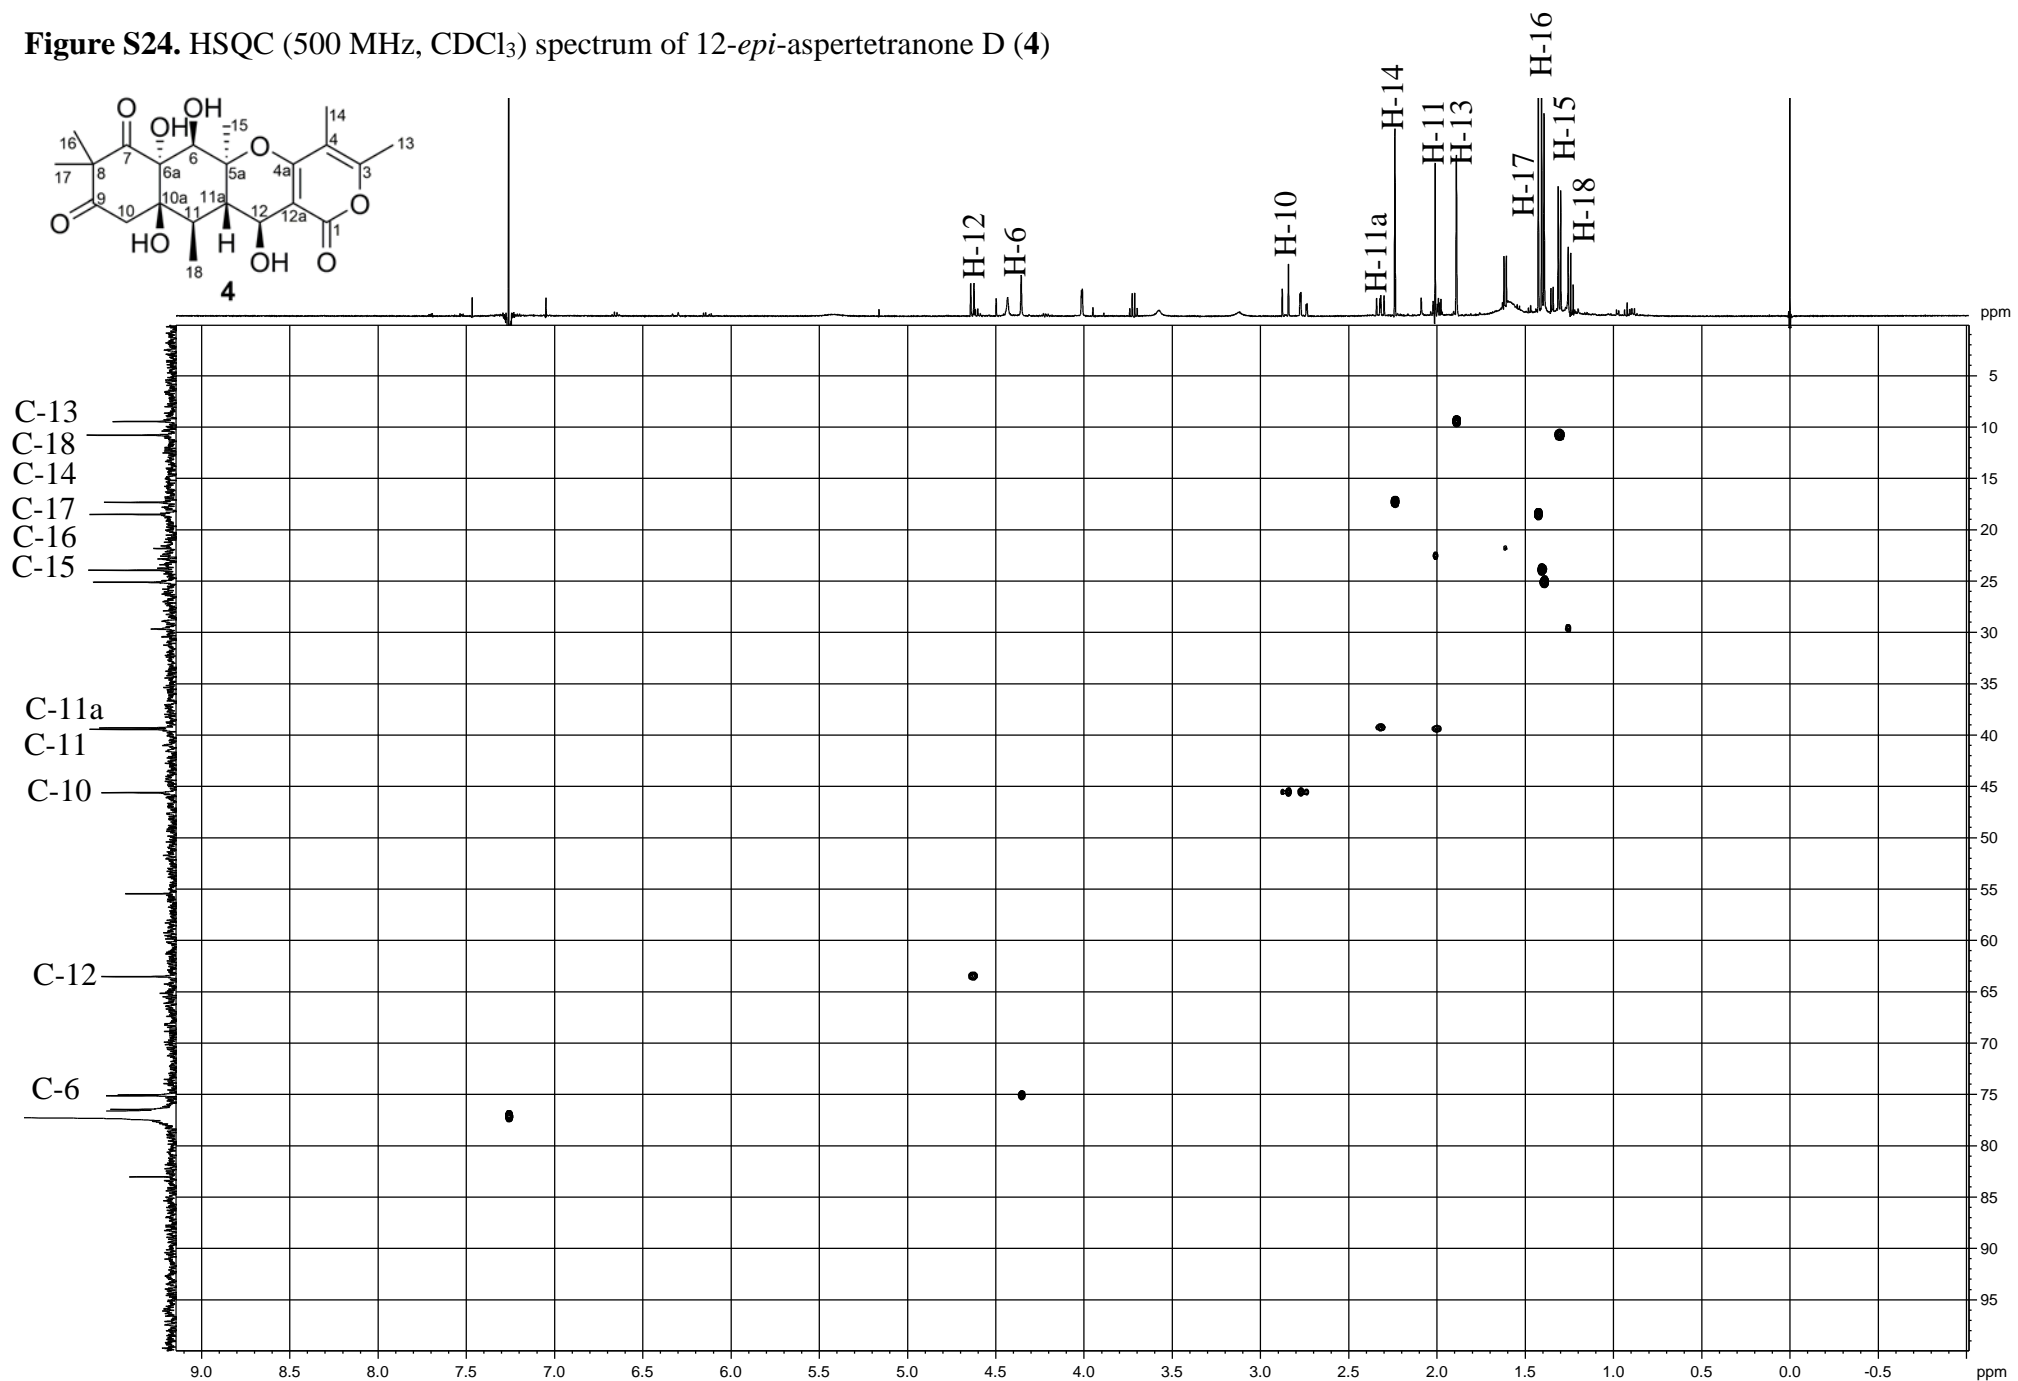

Figure S25. HMBC (500 MHz, CDCl<sub>3</sub>) spectrum of 12-*epi*-aspertetranone D (4)

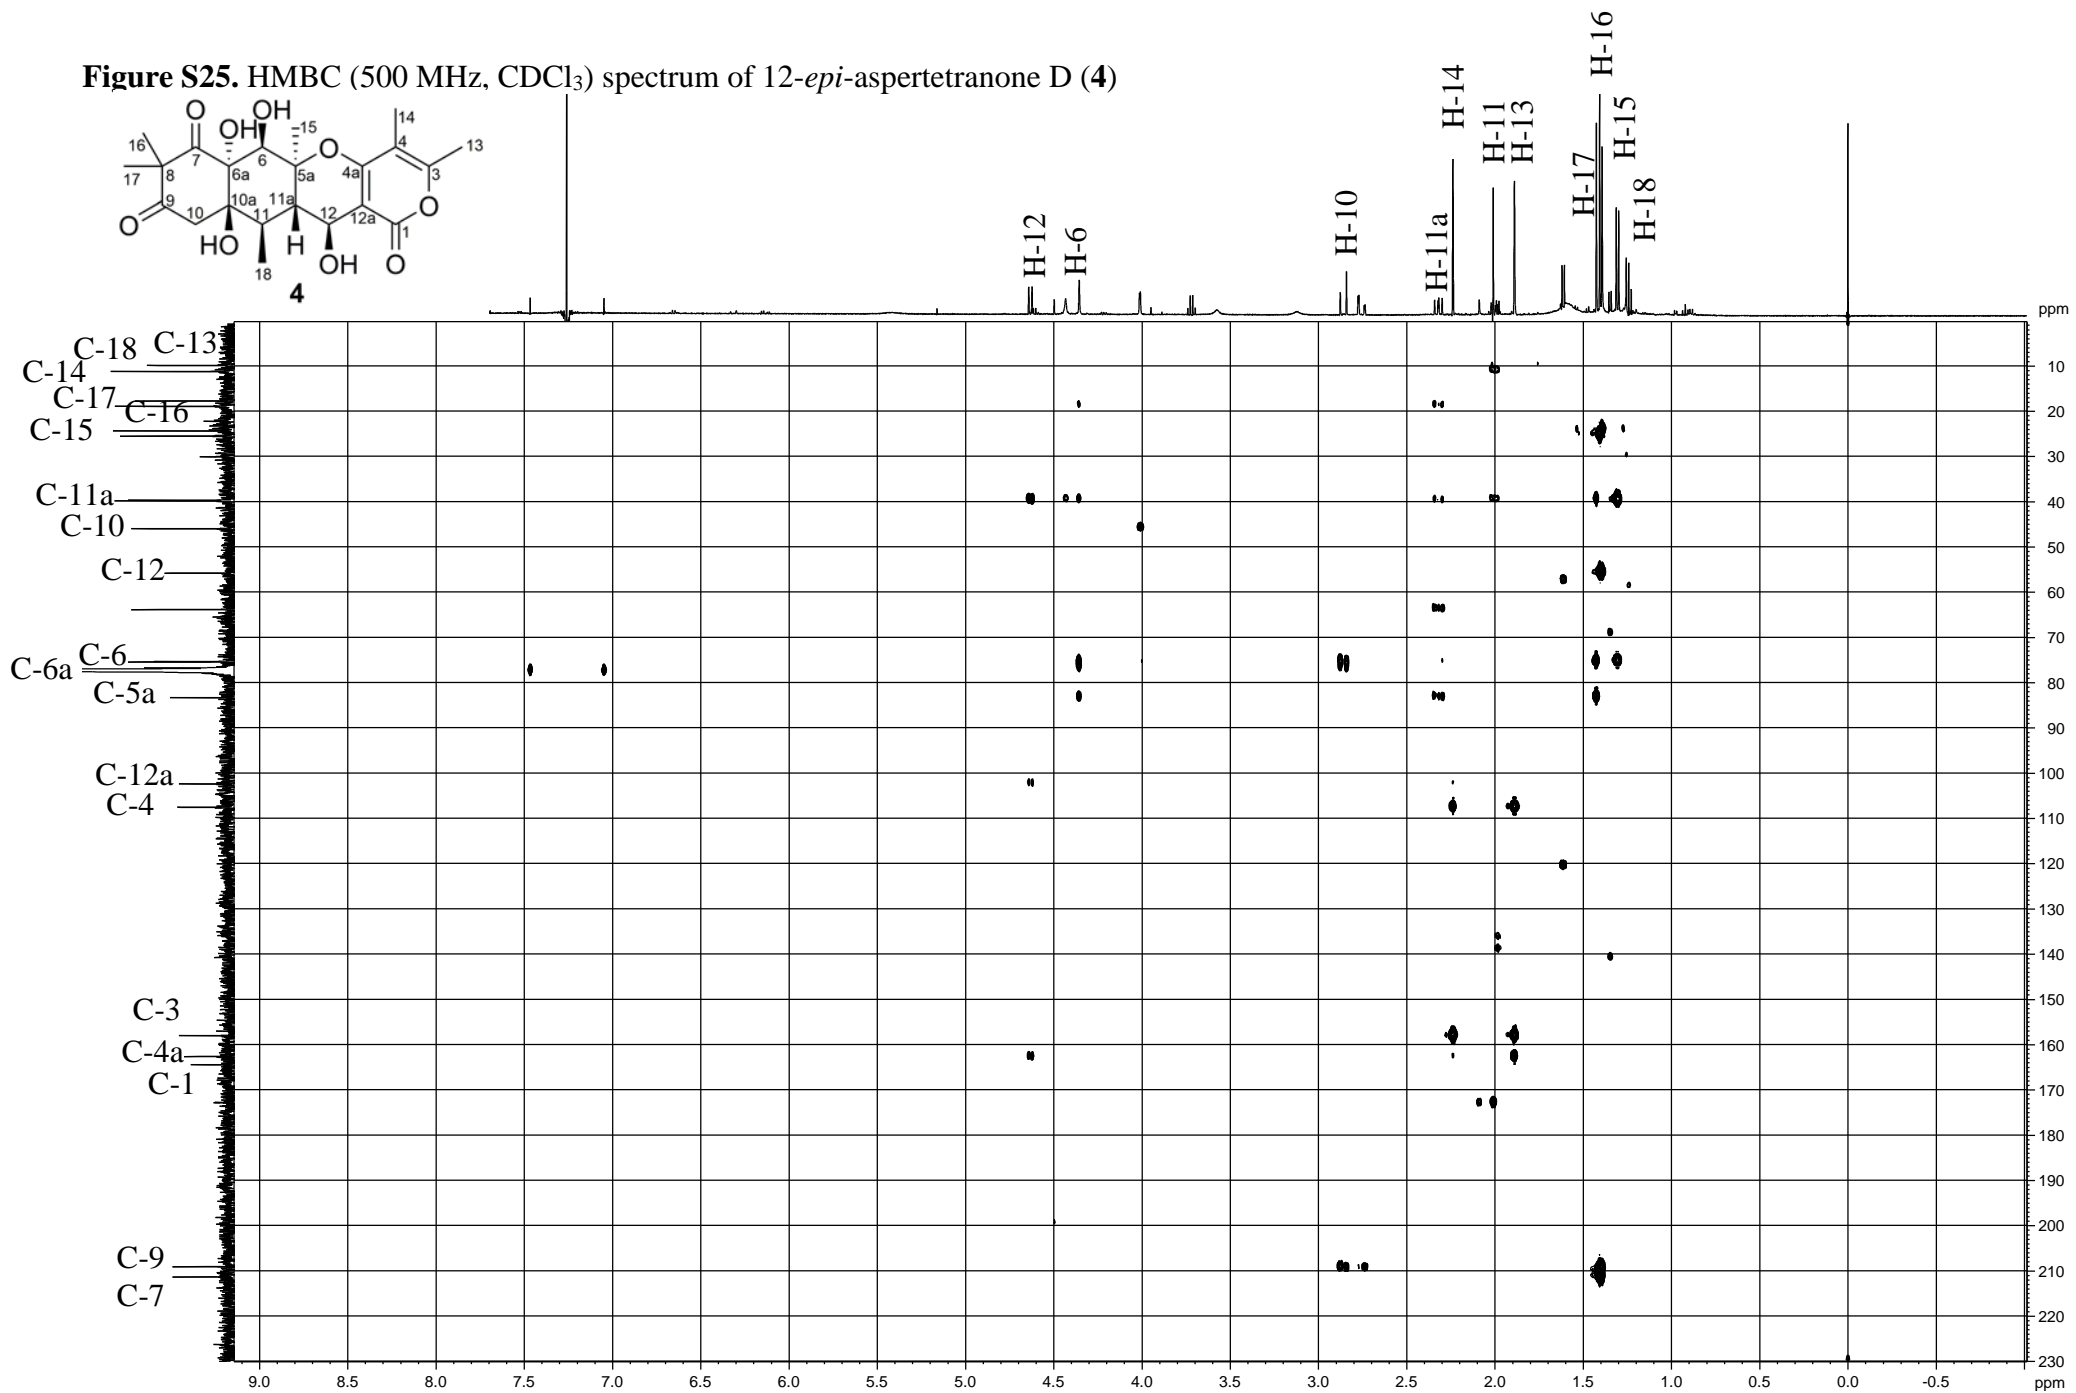

**Figure S26.** ROESY (500 MHz, CDCl<sub>3</sub>) spectrum of 12-*epi*-aspartetranone D (**4**)

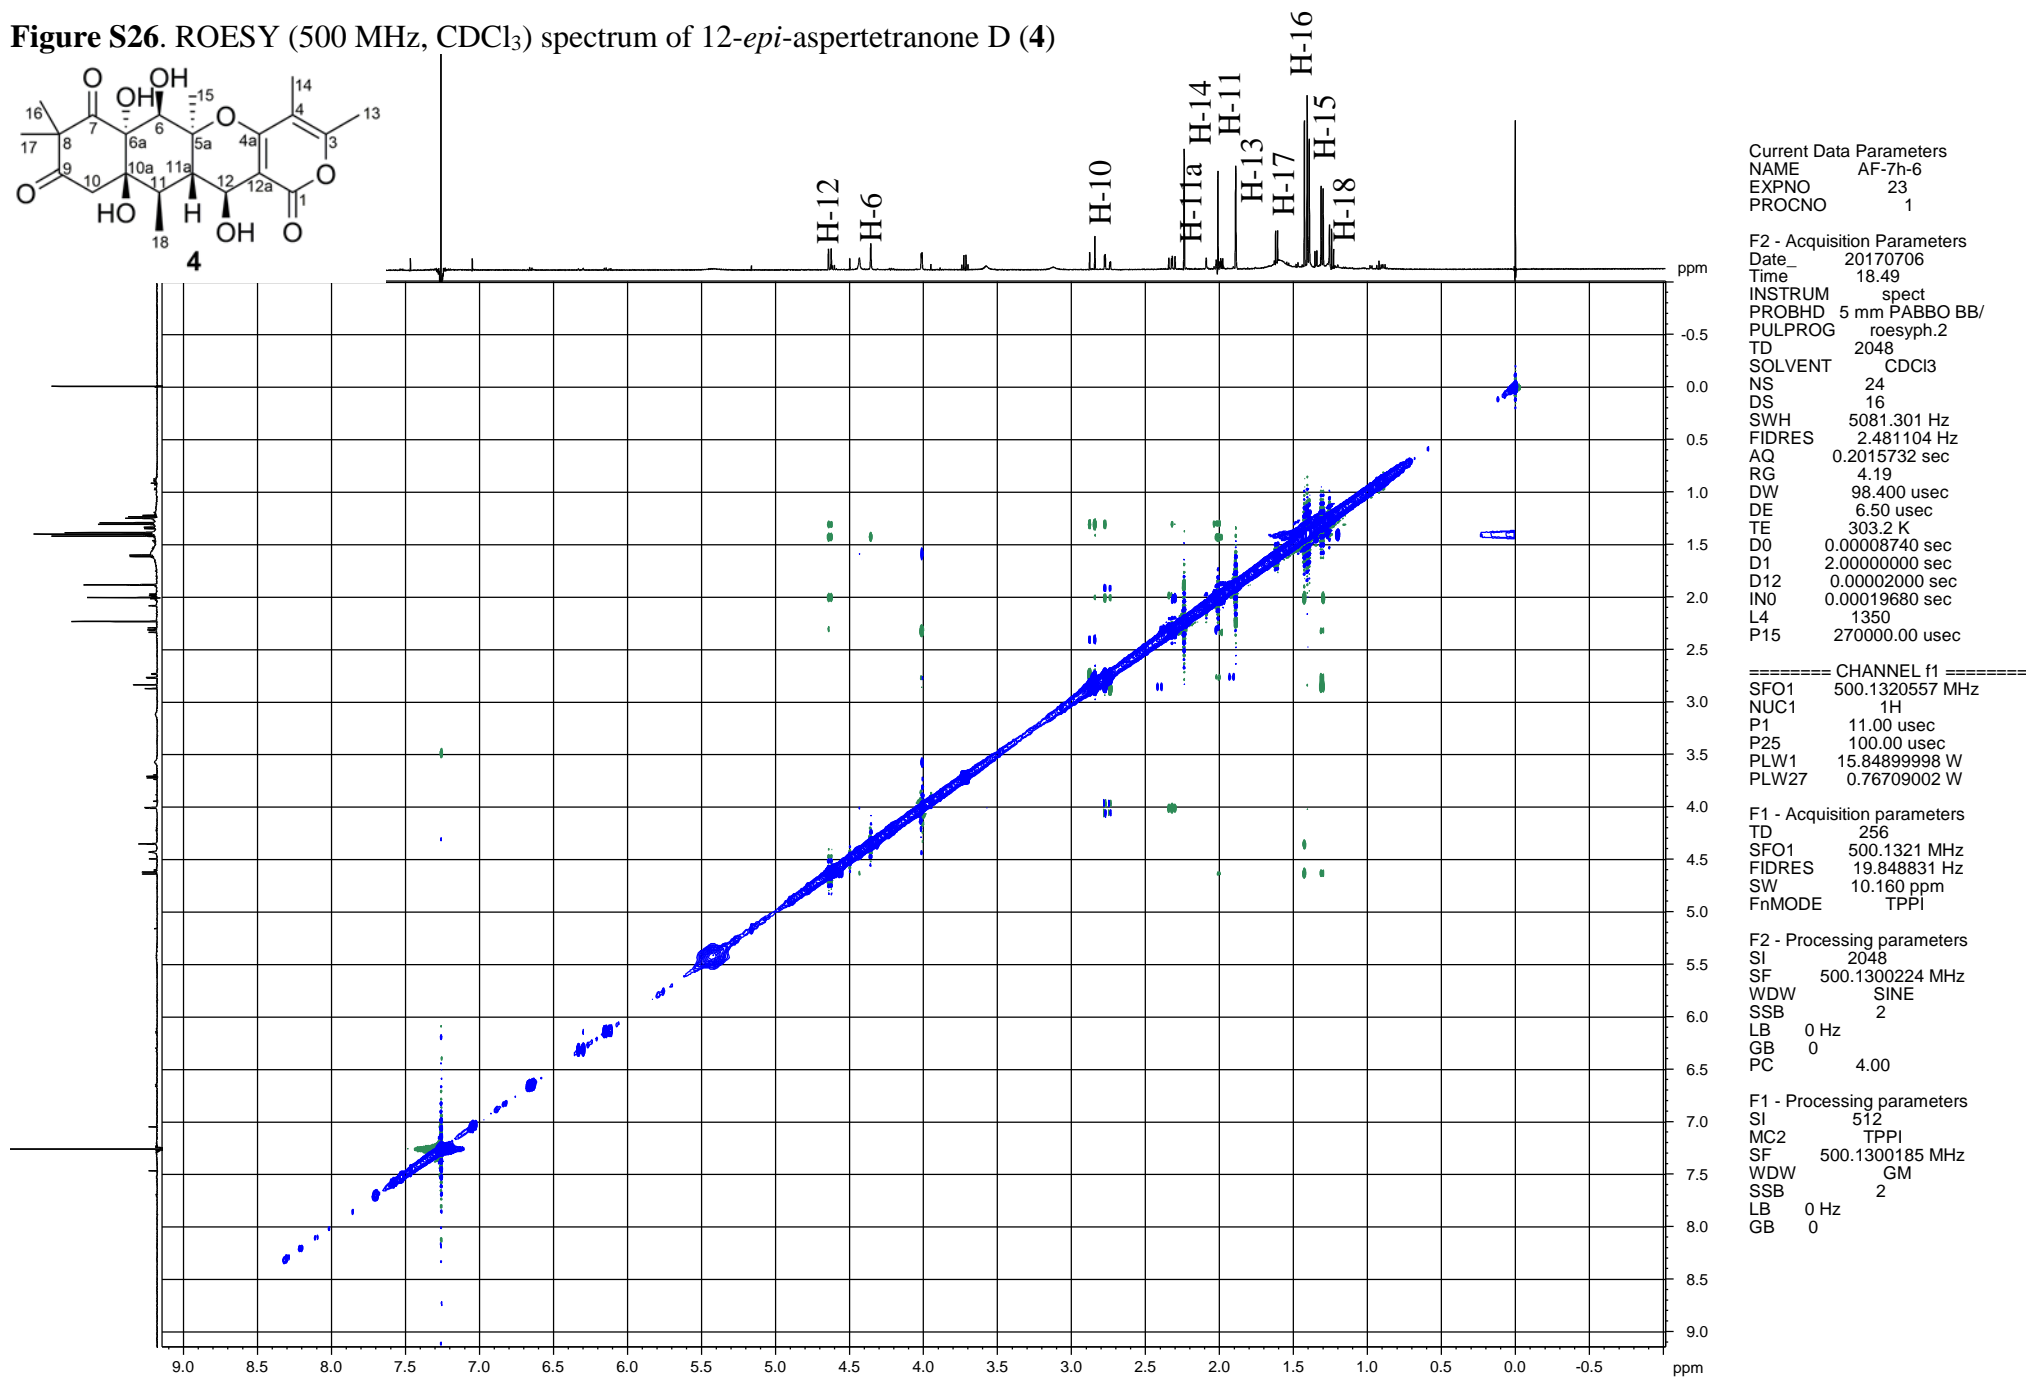

**Figure S27.** ECD spectrum of 12-*epi*-aspartetranone D (**4**) in methanol

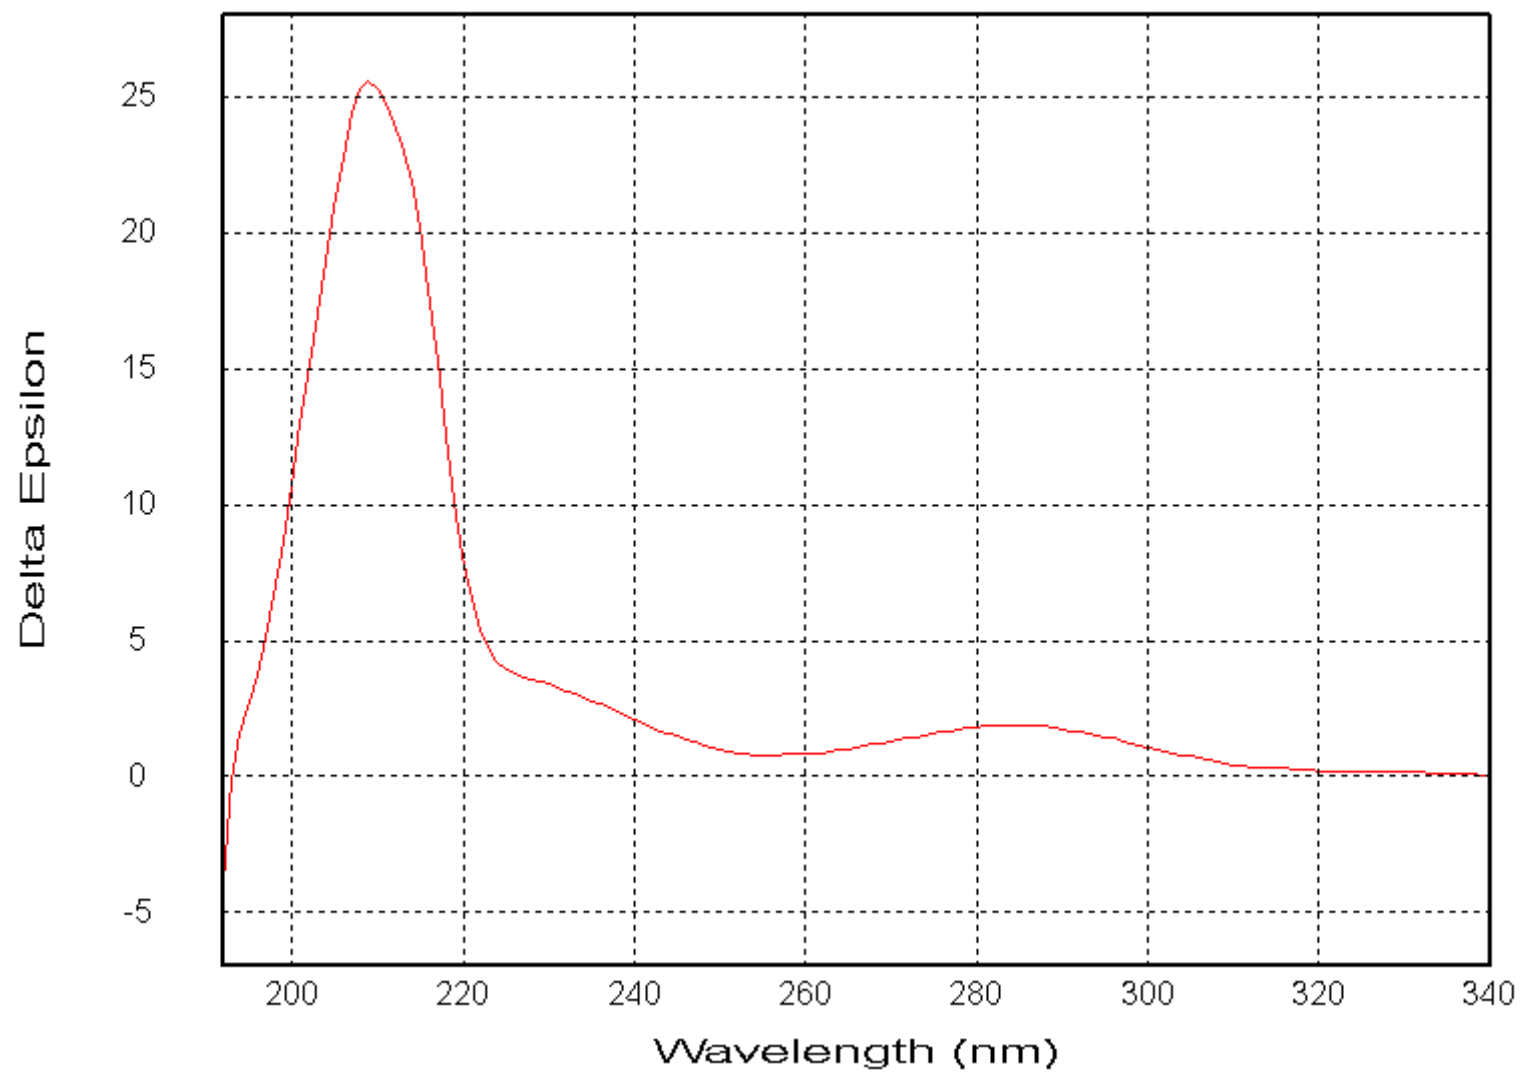

Figure S28.  $^1\text{H}$  NMR (500 MHz,  $\text{CDCl}_3$ ) spectrum of aspertetranone D (**5**)

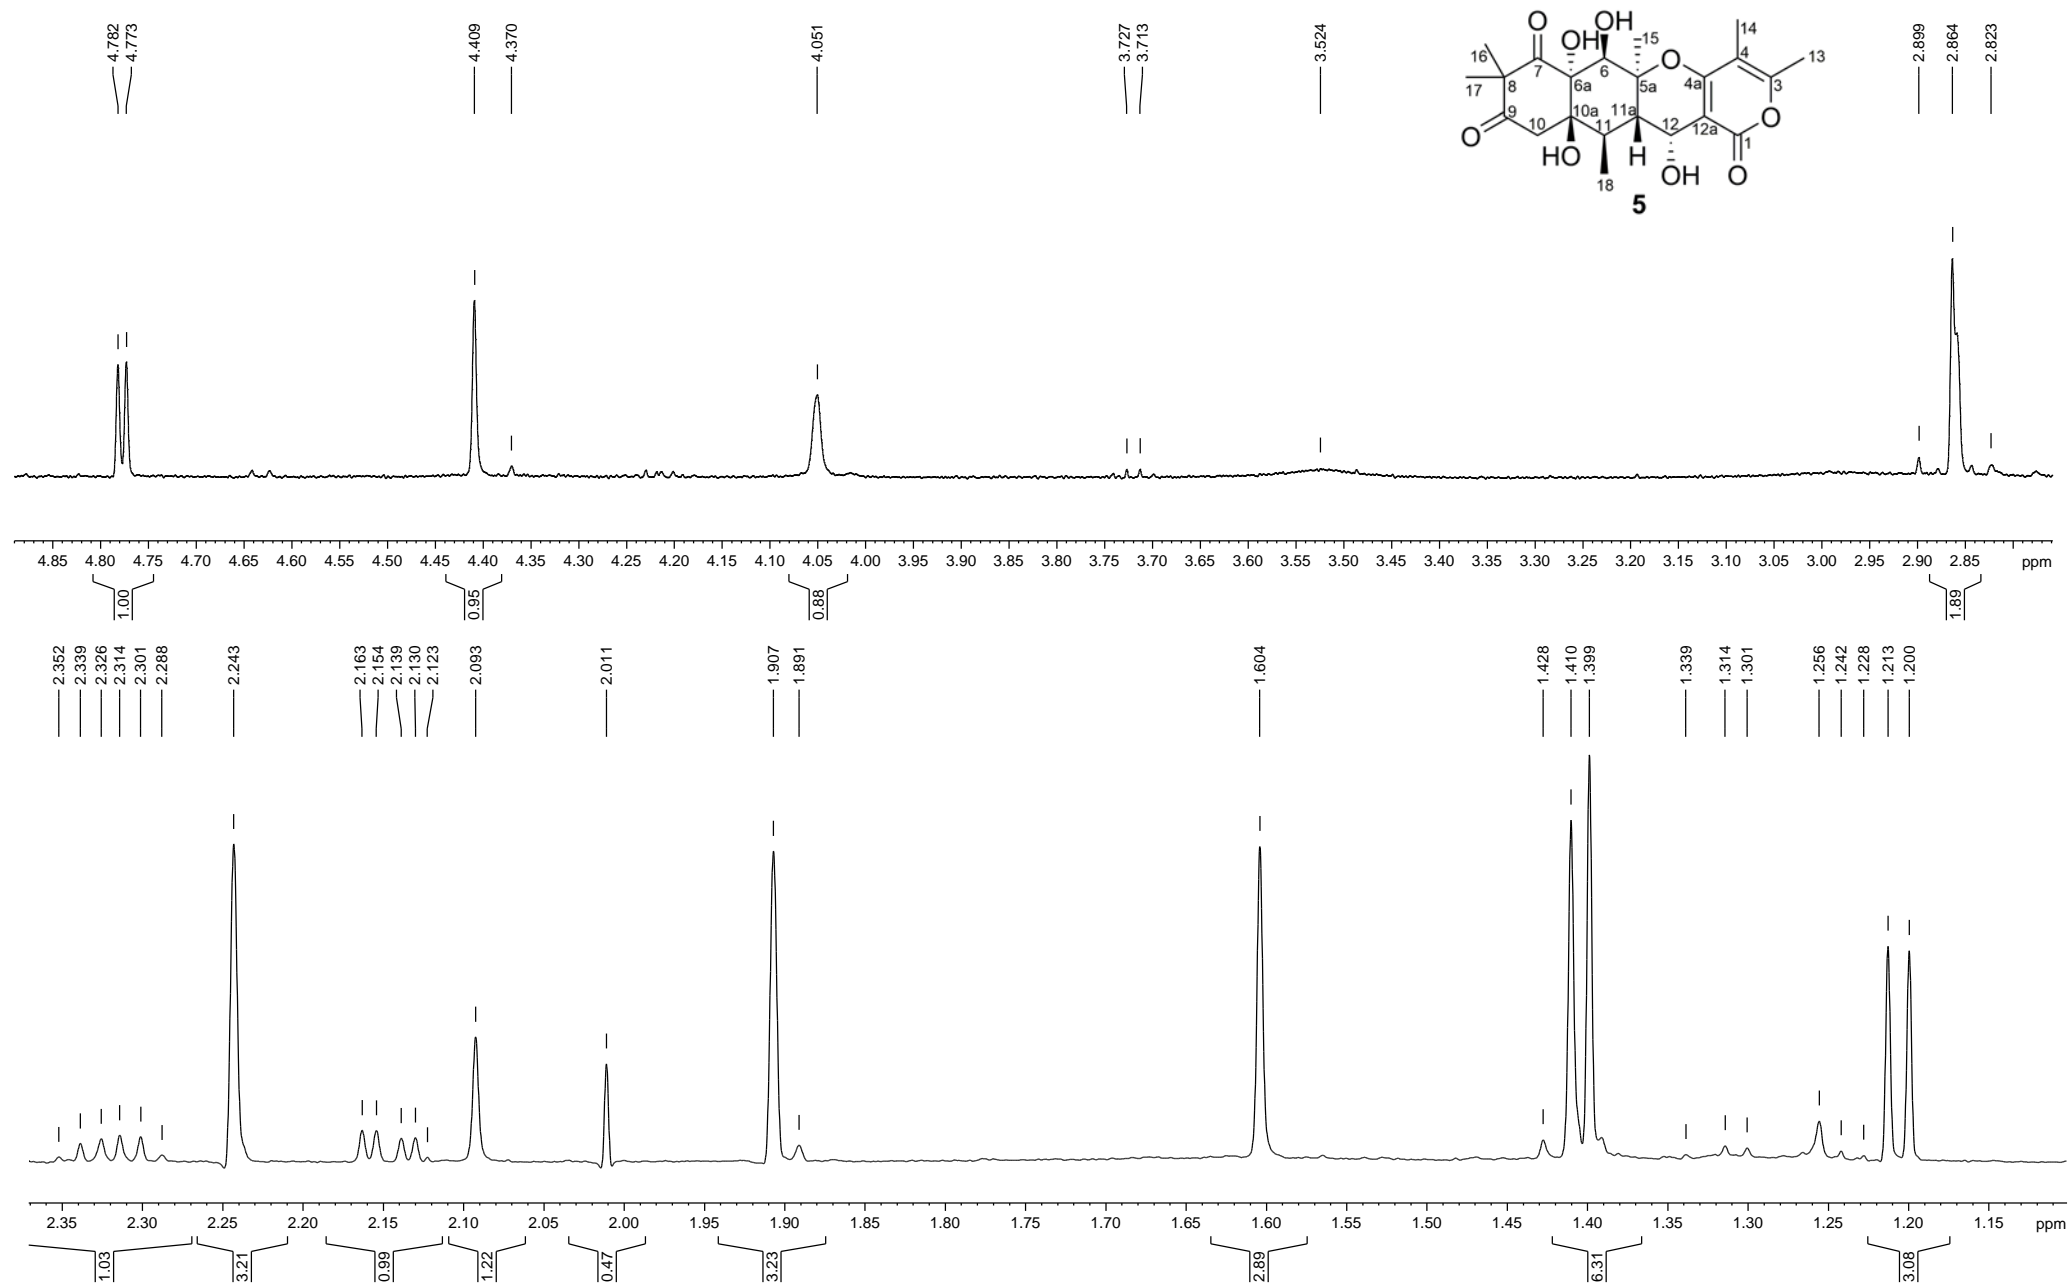



**Figure S29.**  $^{13}\text{C}$  NMR (176 MHz,  $\text{CDCl}_3$ ) spectrum of aspertetranone D (**5**)

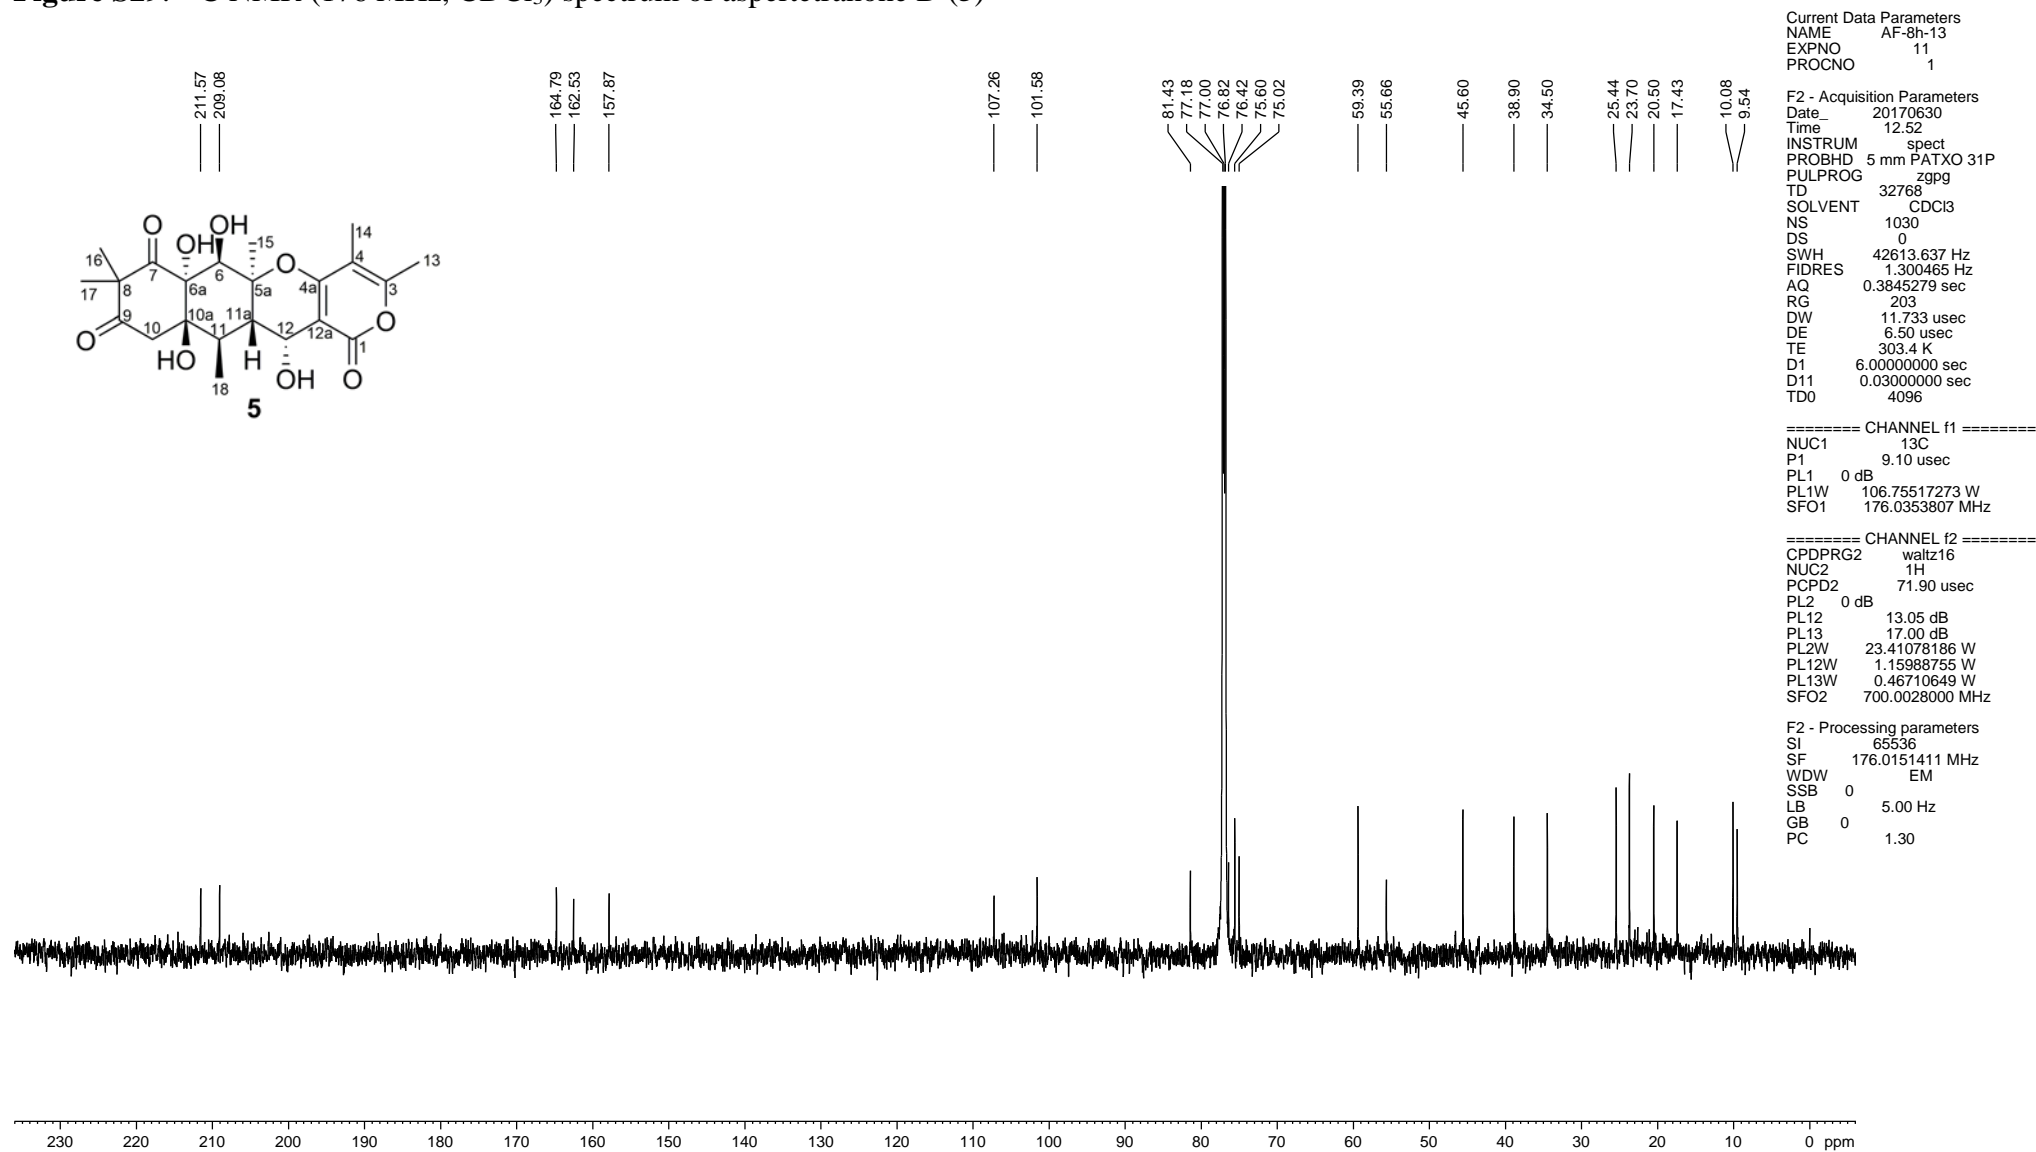

**Figure S30.** <sup>1</sup>H NMR (500 MHz, acetone-d<sub>6</sub>) spectrum of aspertetranone A (**6**)

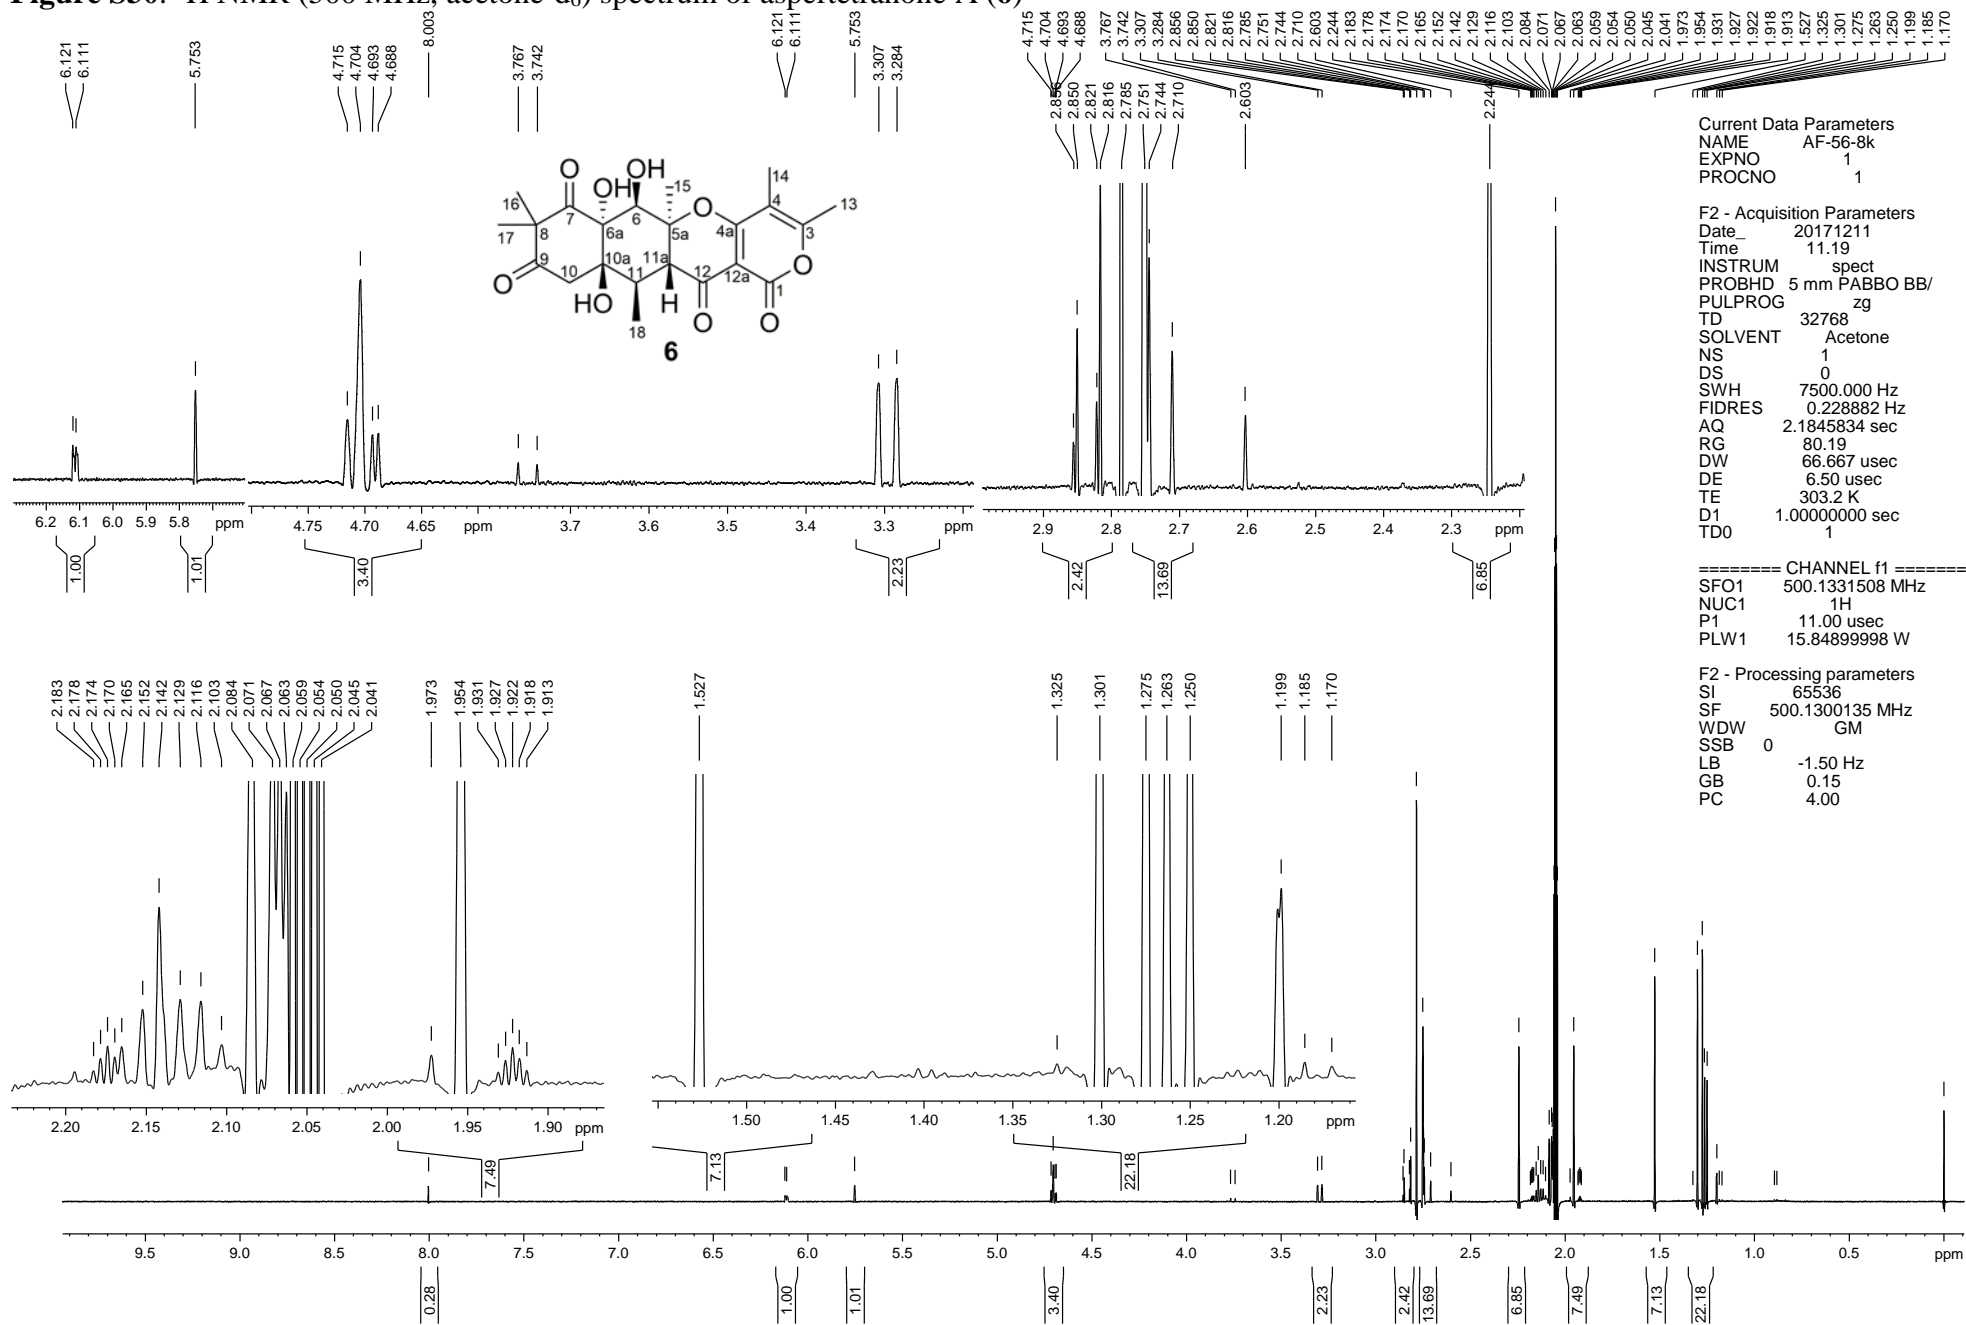

**Figure S31.**  $^{13}\text{C}$  NMR (125 MHz, acetone- $d_6$ ) spectrum of aspertetranone A (**6**)

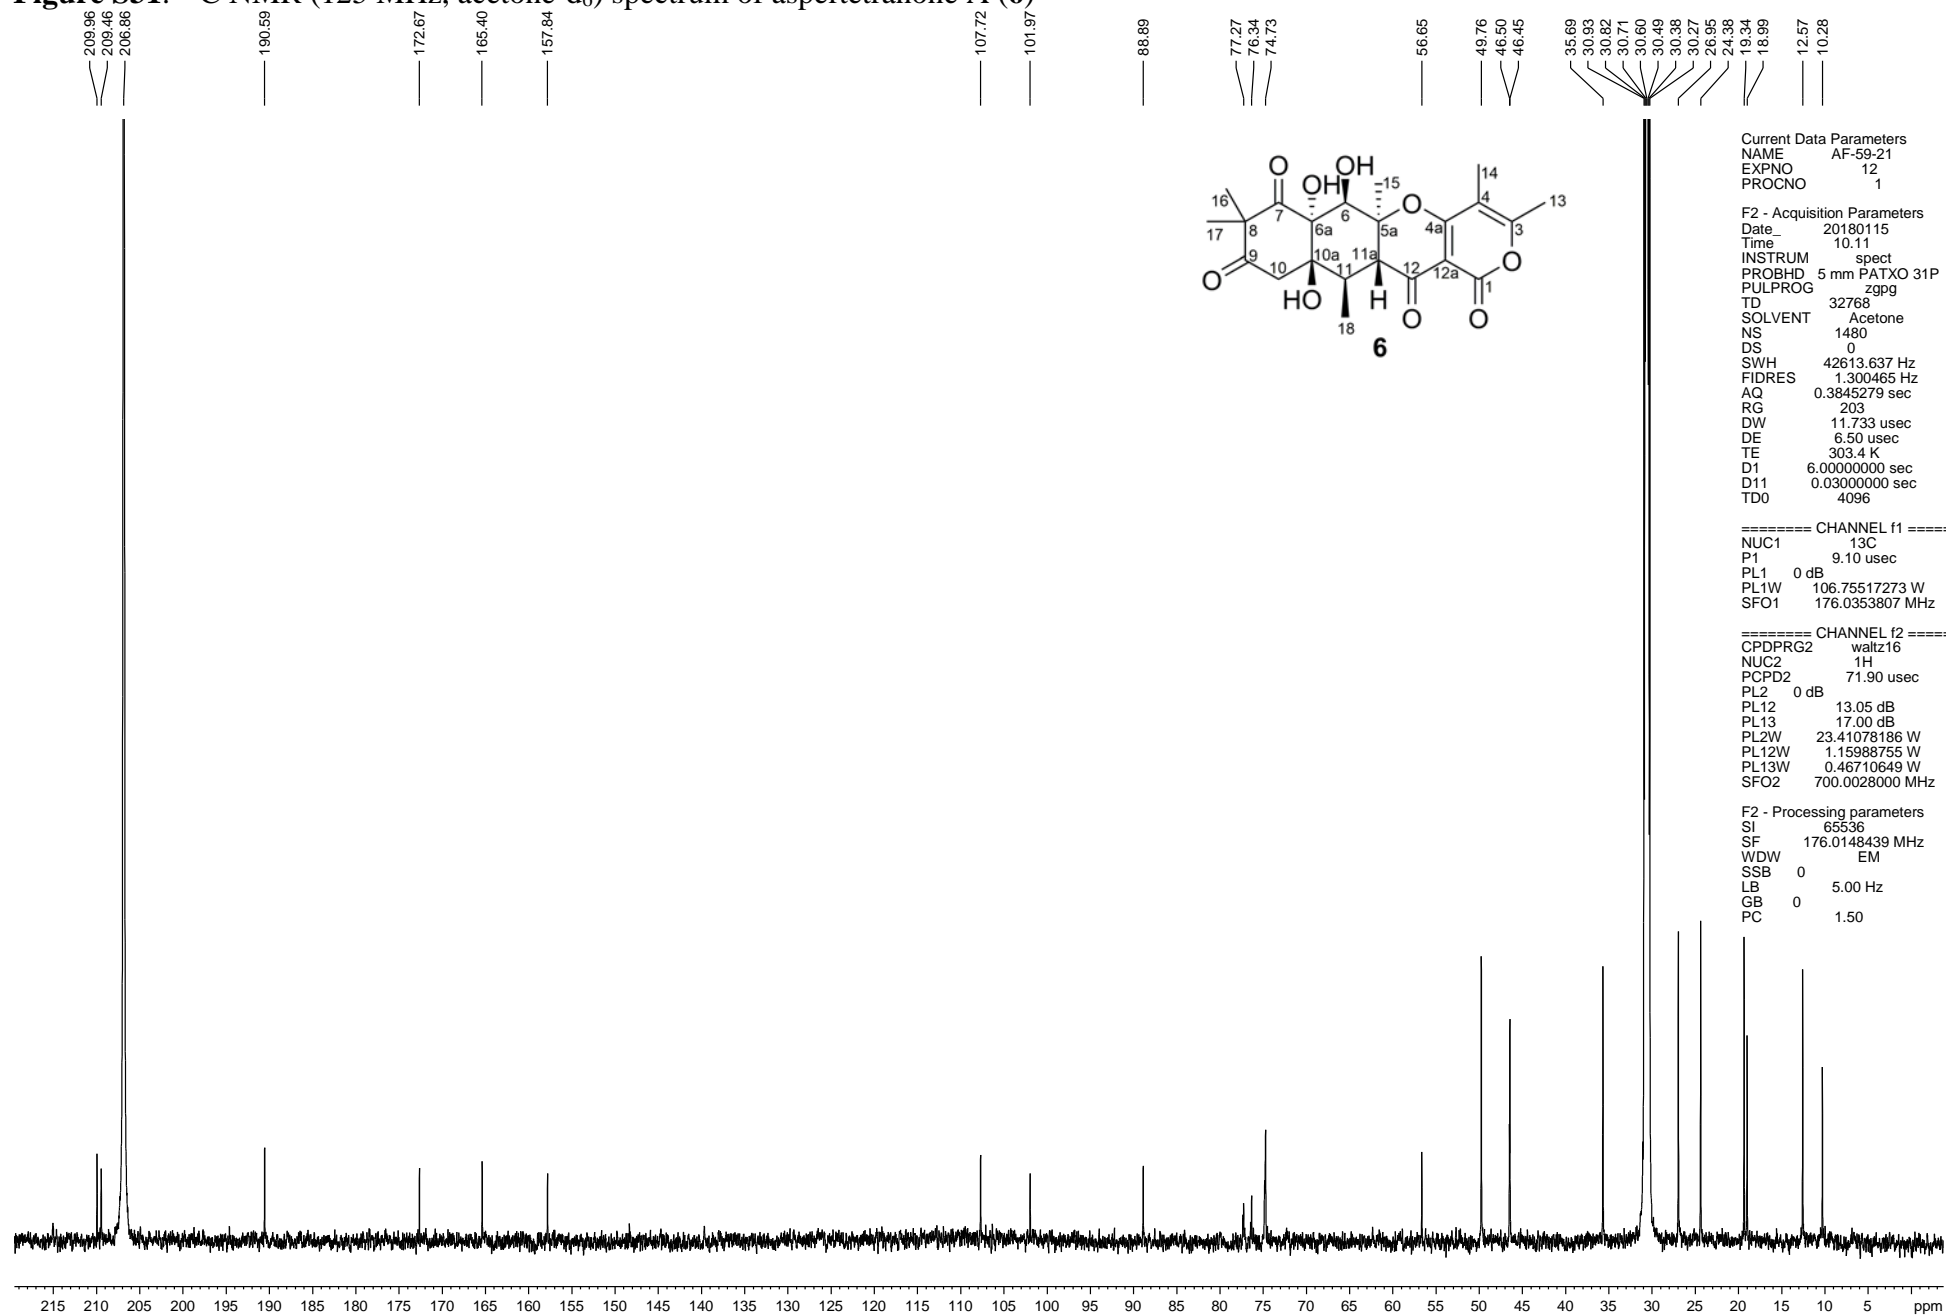

**Figure S32.** DEPT-135 (125 MHz, acetone-d<sub>6</sub>) spectrum of aspertetranone A (**6**)

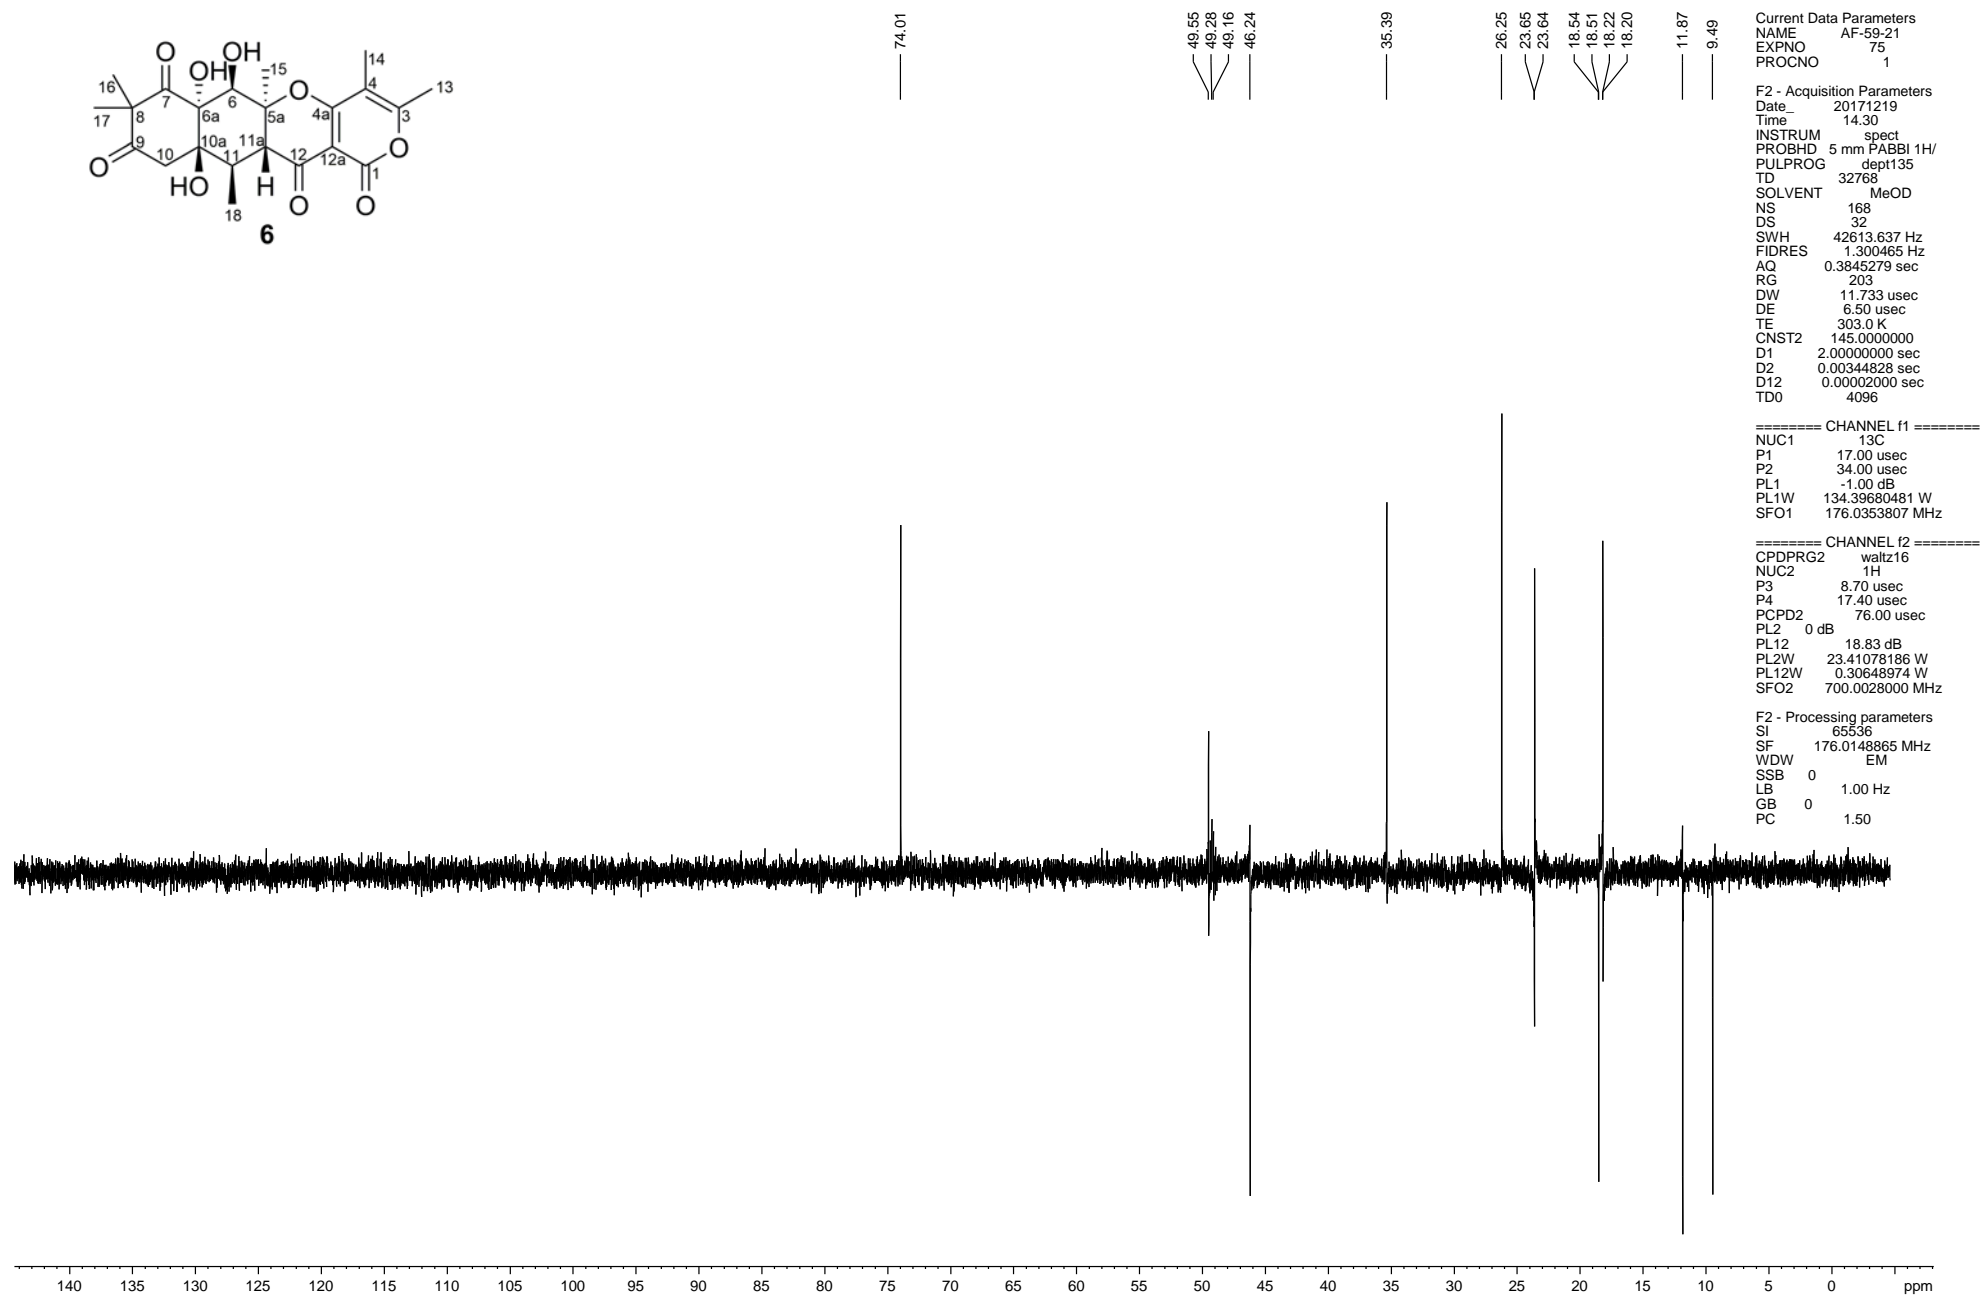

**Figure S33.**  $^1\text{H}$  NMR (500 MHz,  $\text{CDCl}_3$ ) spectrum of  $6\beta,9\alpha,14$ -trihydroxycinnamolide (**7**)

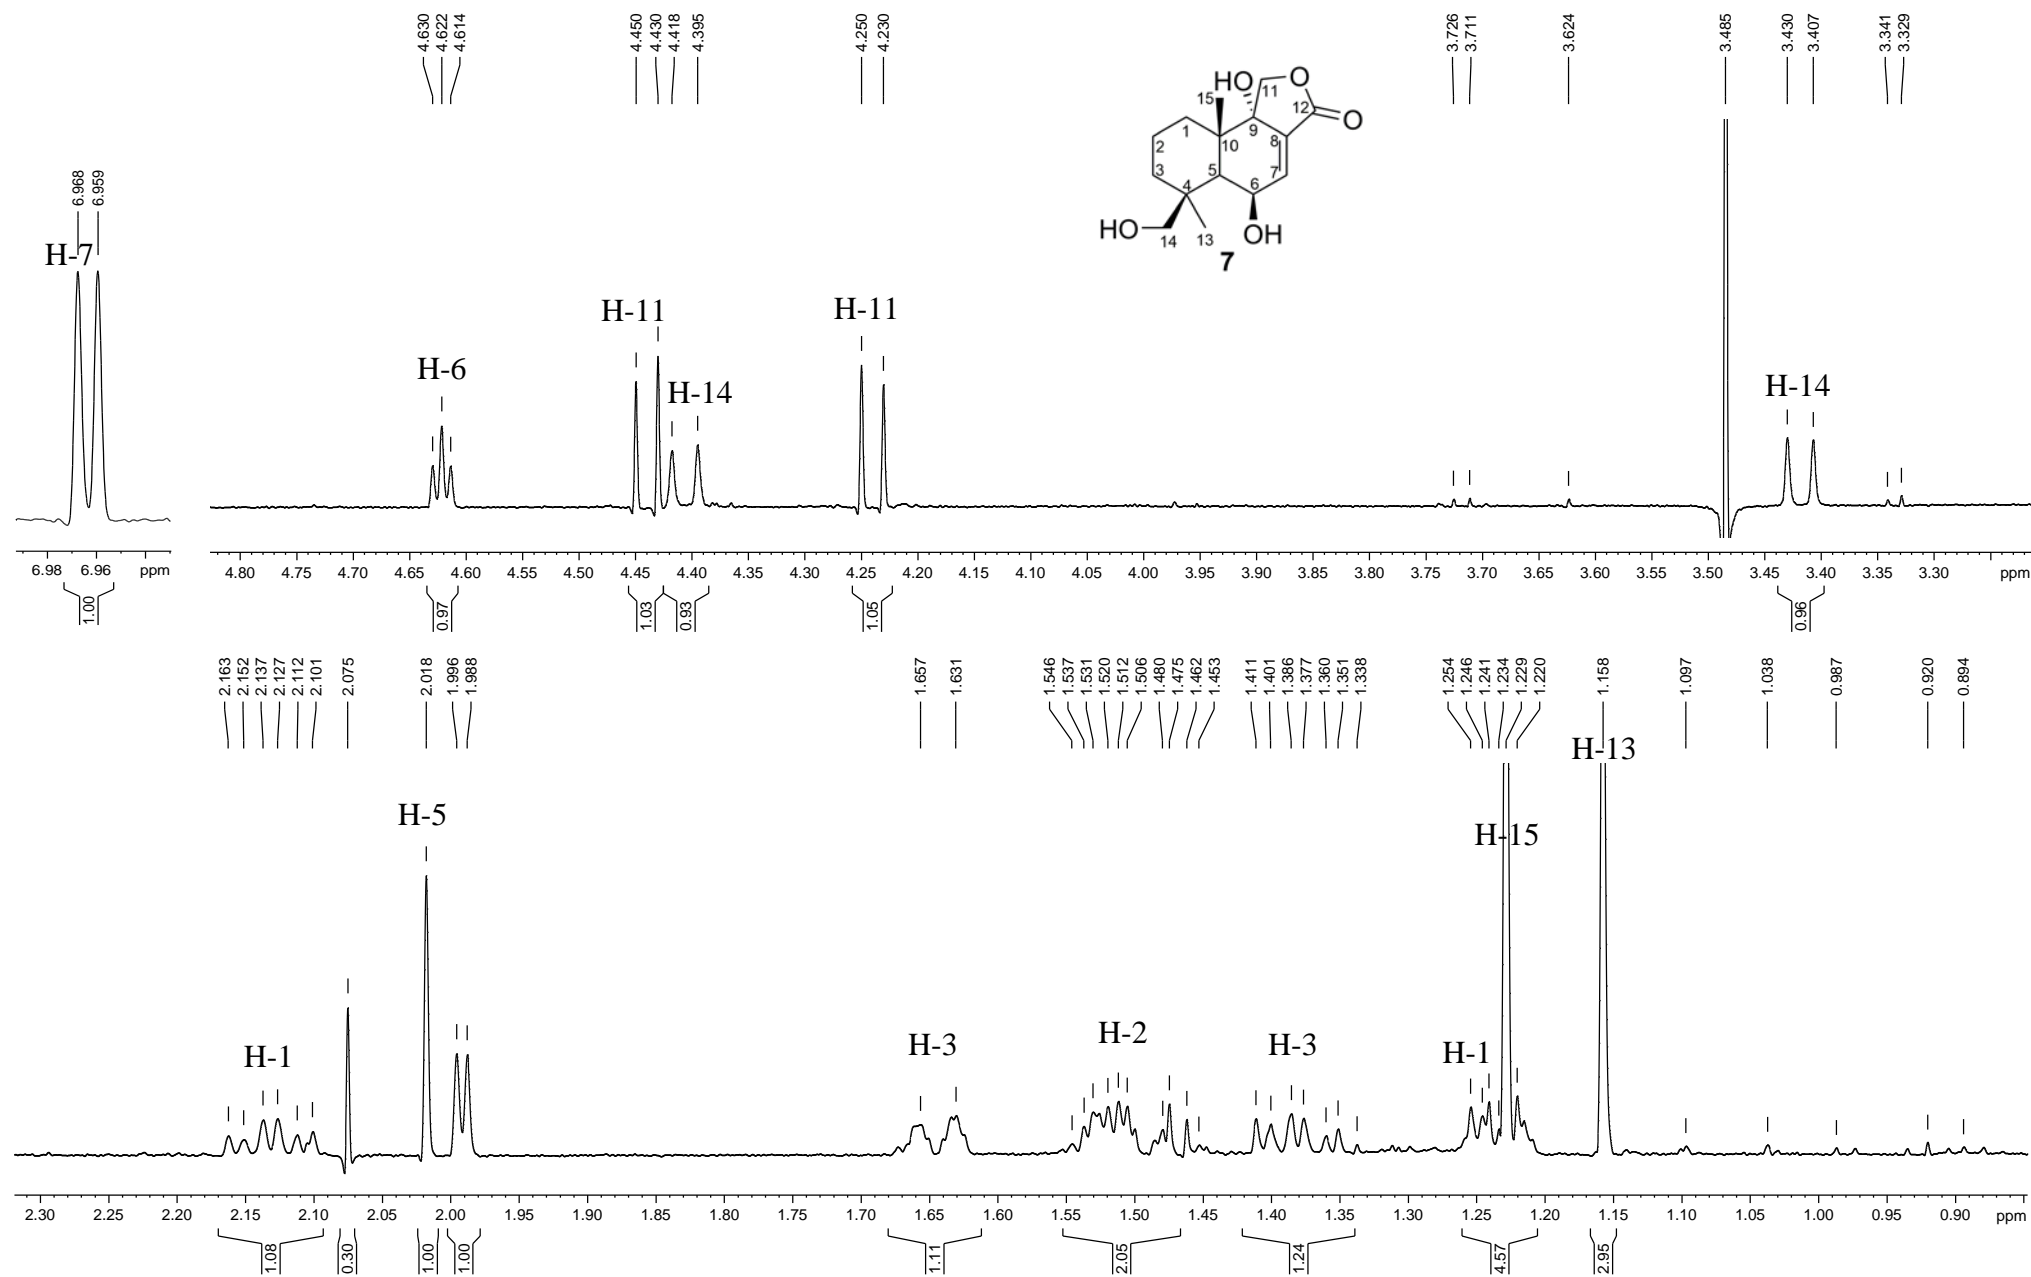

**Figure S34.**  $^{13}\text{C}$  NMR (500 MHz,  $\text{CDCl}_3$ ) spectrum of  $6\beta,9\alpha,14$ -trihydroxycinnamolide (**7**)

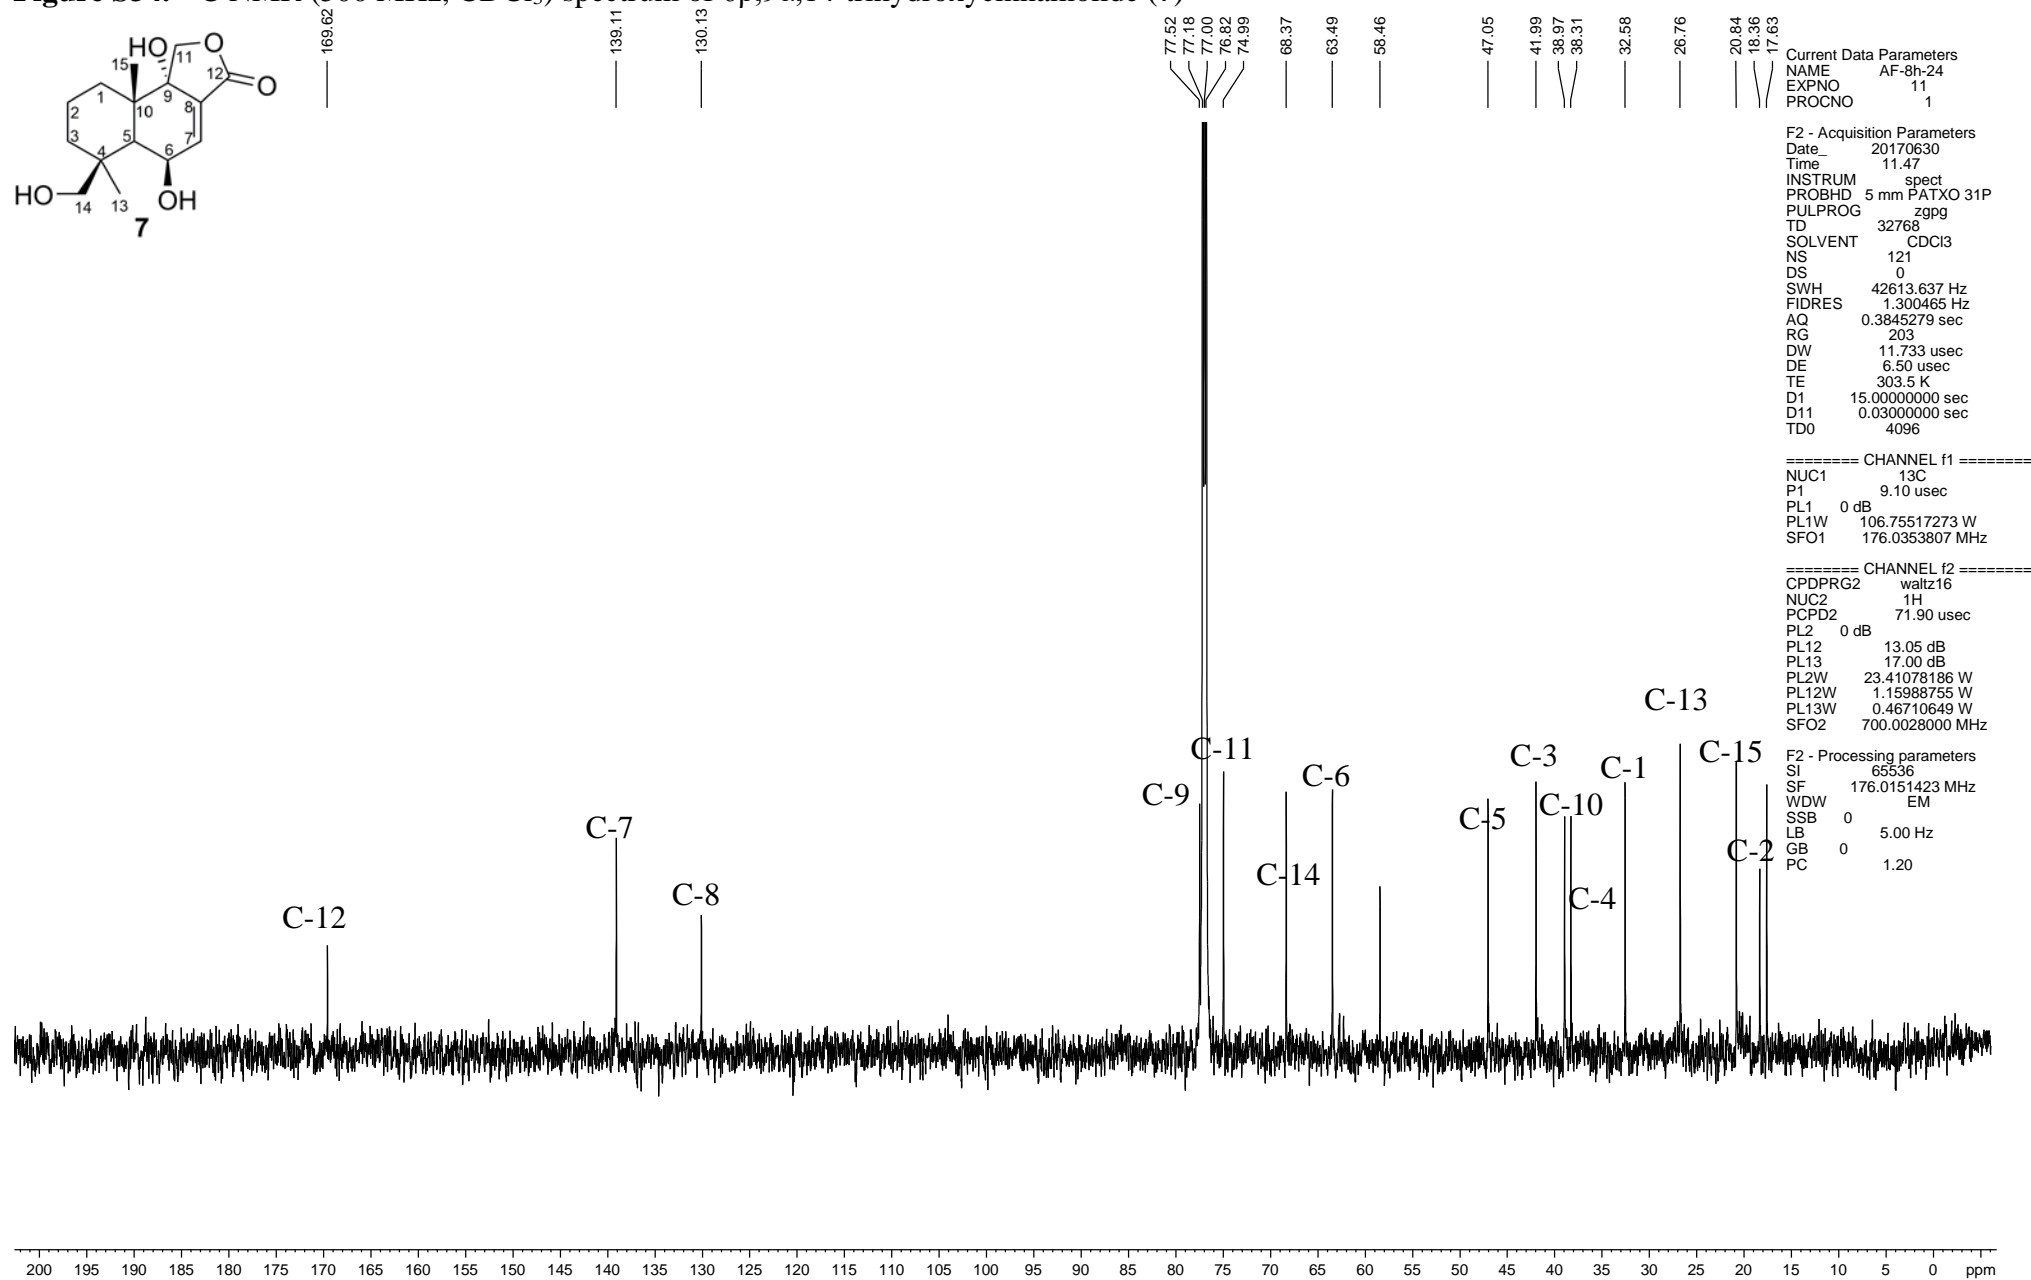

**Figure S35.** DEPT-135 (500 MHz, CDCl<sub>3</sub>) spectrum of 6 $\beta$ ,9 $\alpha$ ,14-trihydroxycinnamolide (**7**)

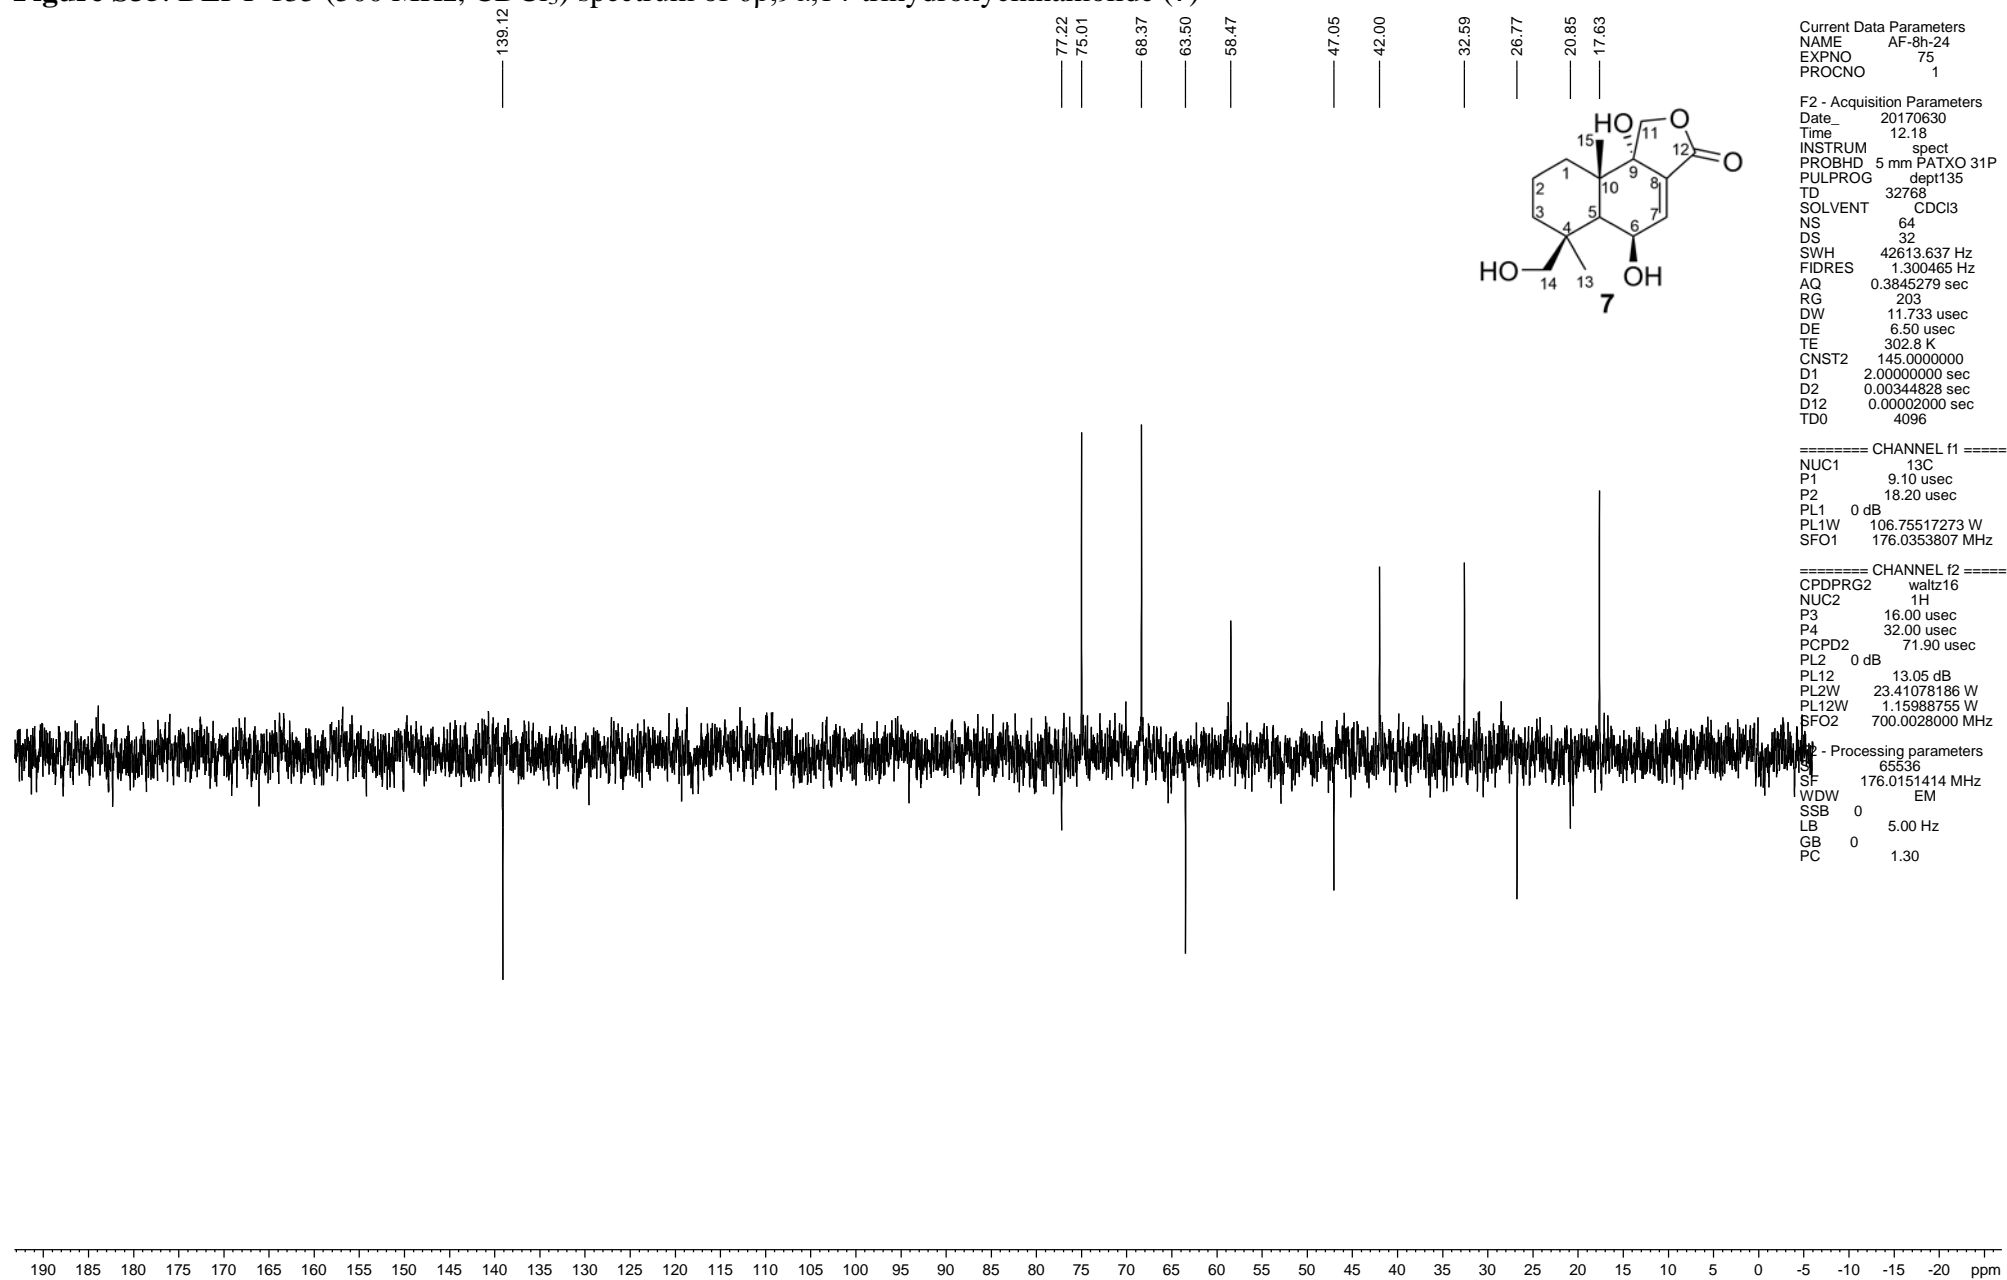

Figure S36. <sup>1</sup>H-<sup>1</sup>H COSY (500 MHz, CDCl<sub>3</sub>) spectrum of 6β,9α,14-trihydroxycinnamolide (7)

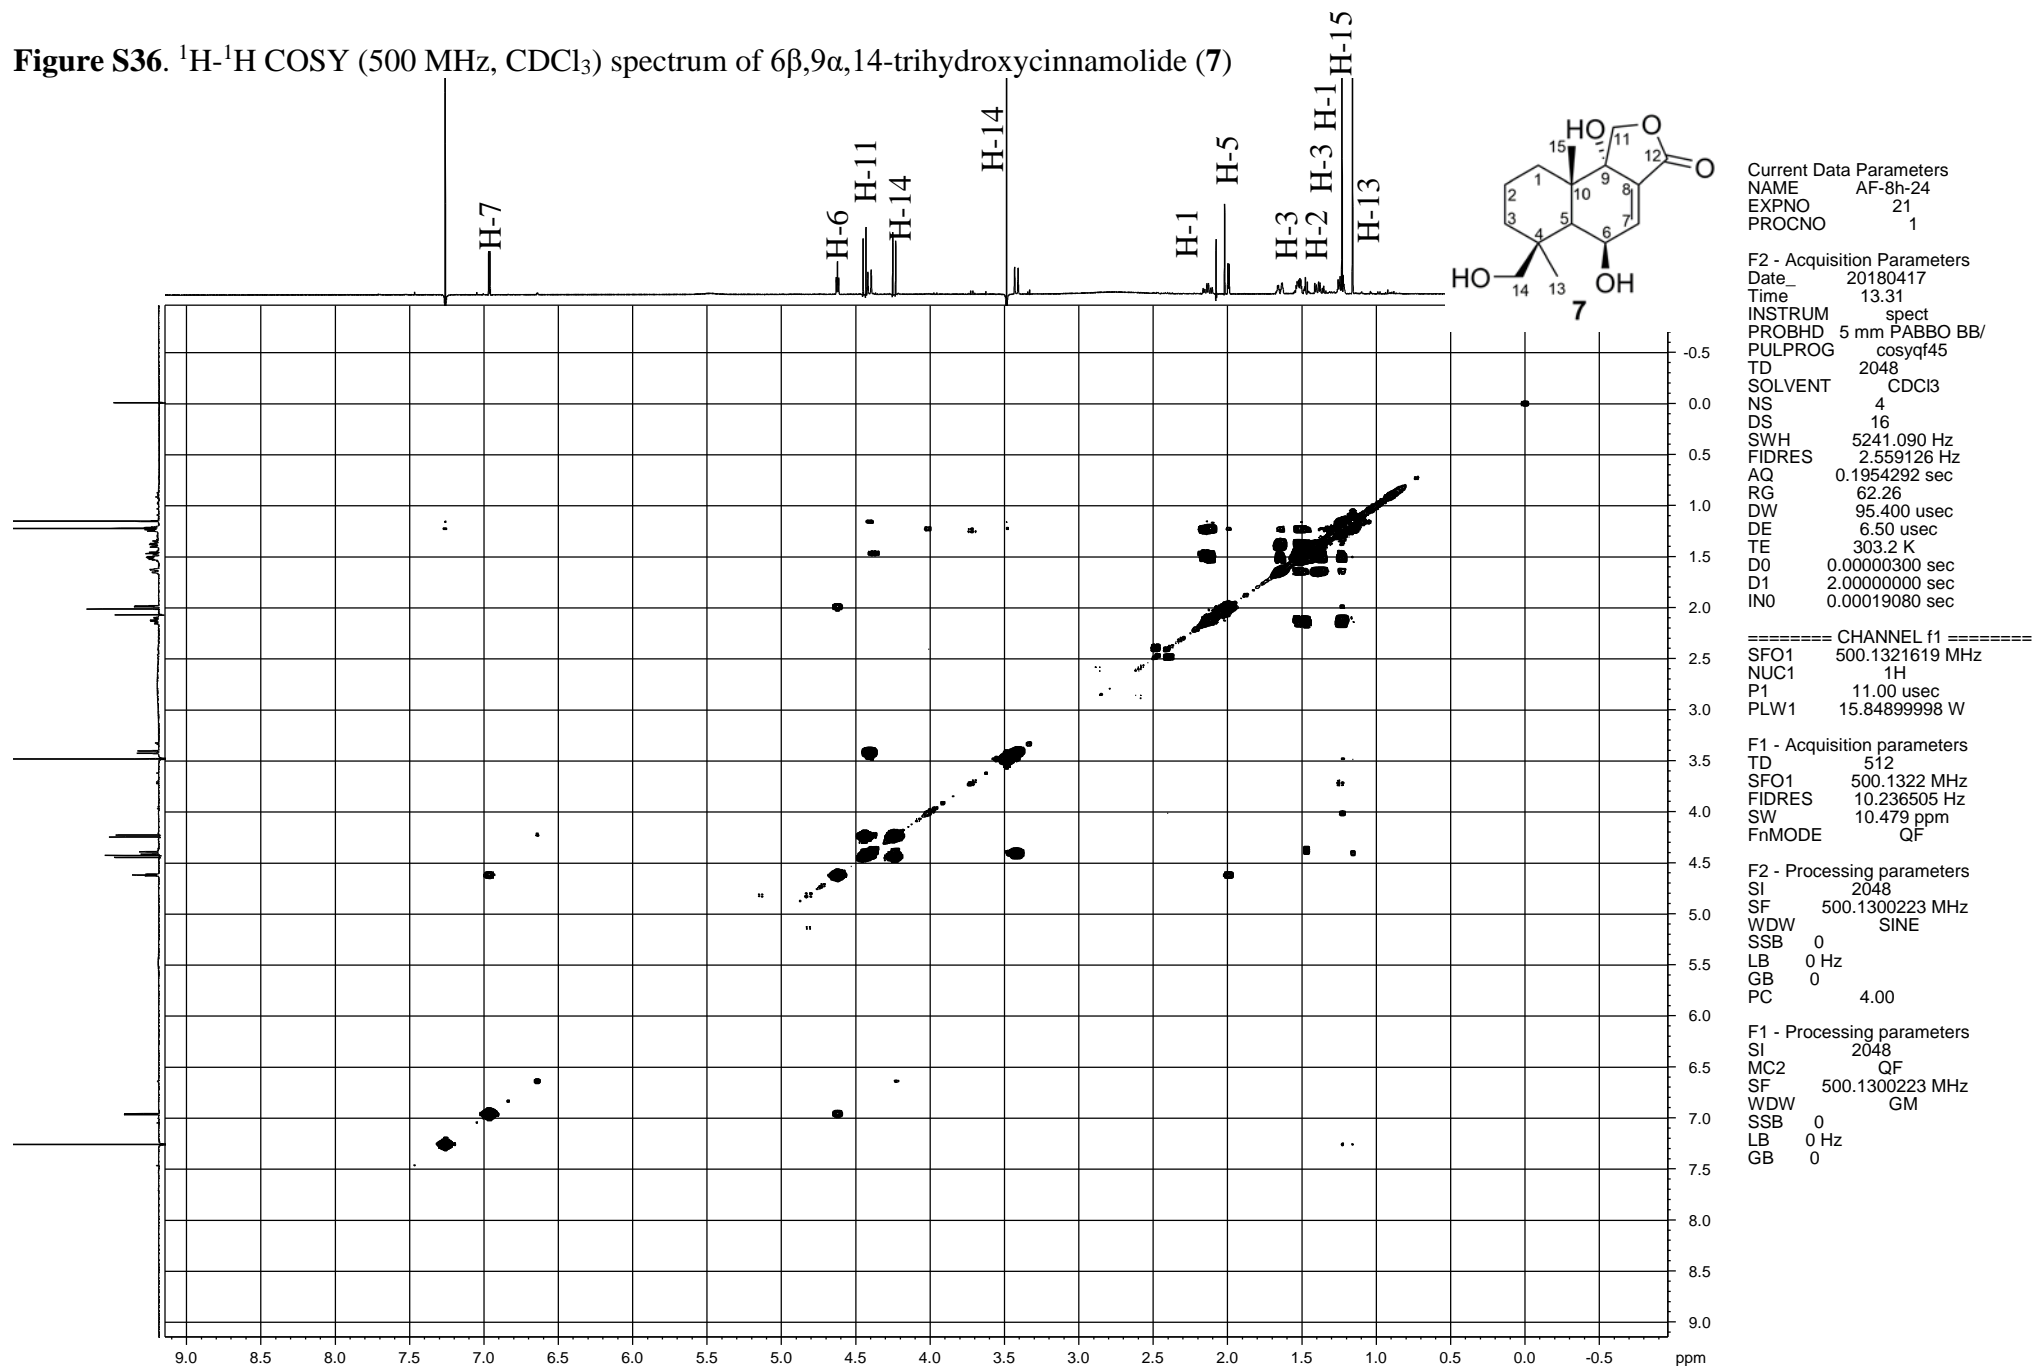



Figure S37. HSQC (500 MHz, CDCl<sub>3</sub>) spectrum of 6 $\beta$ ,9 $\alpha$ ,14-trihydroxycinnamolide (7)

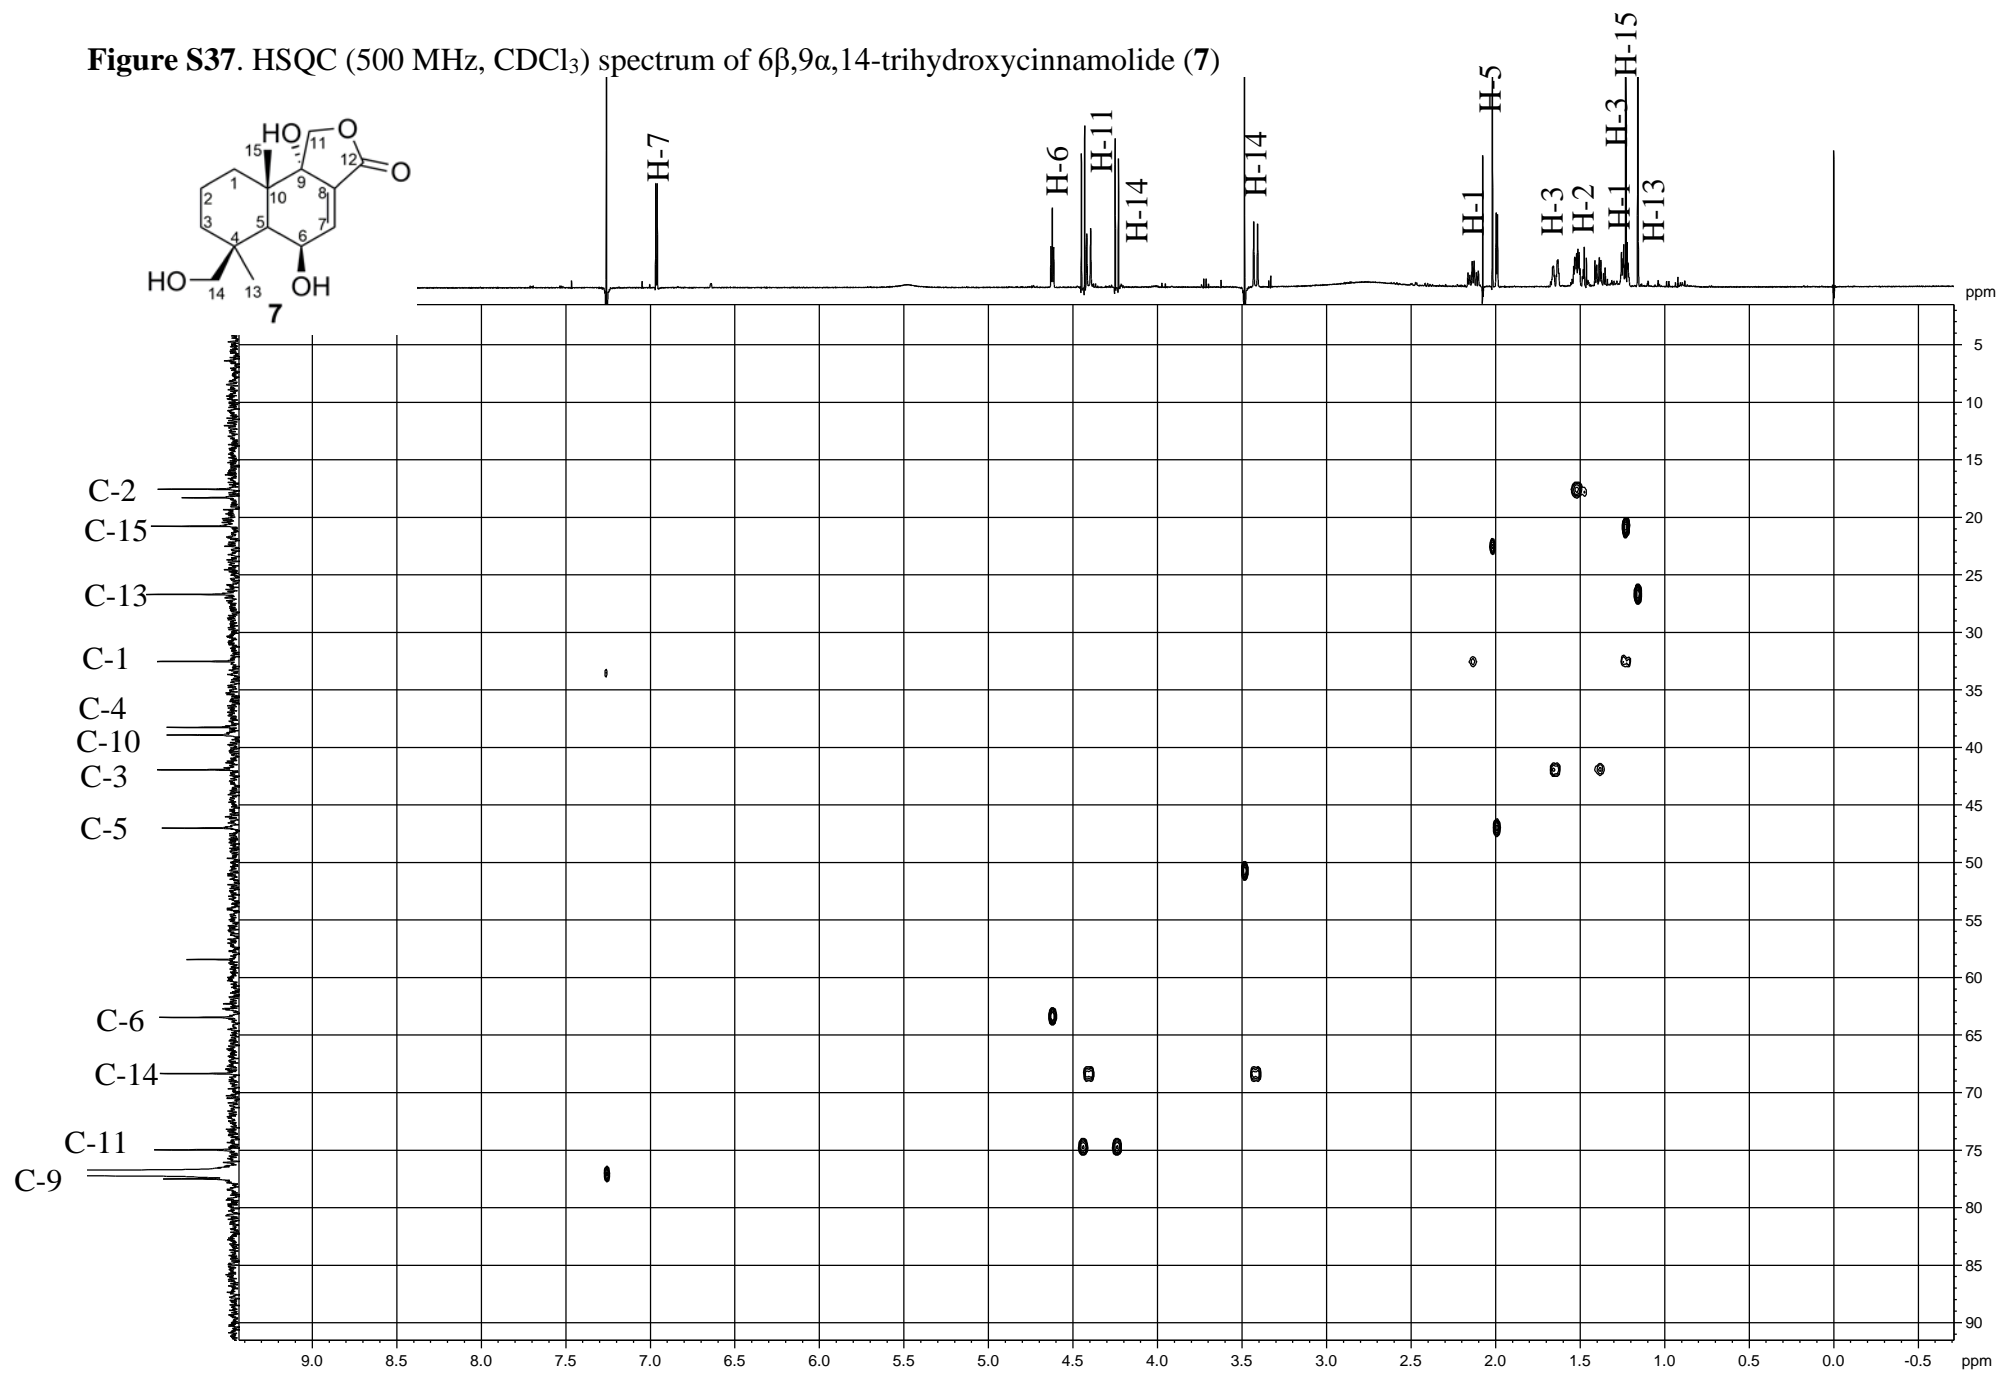

Figure S38. HMBC (500 MHz, CDCl<sub>3</sub>) spectrum of 6β,9α,14-trihydroxycinnamolide (7)

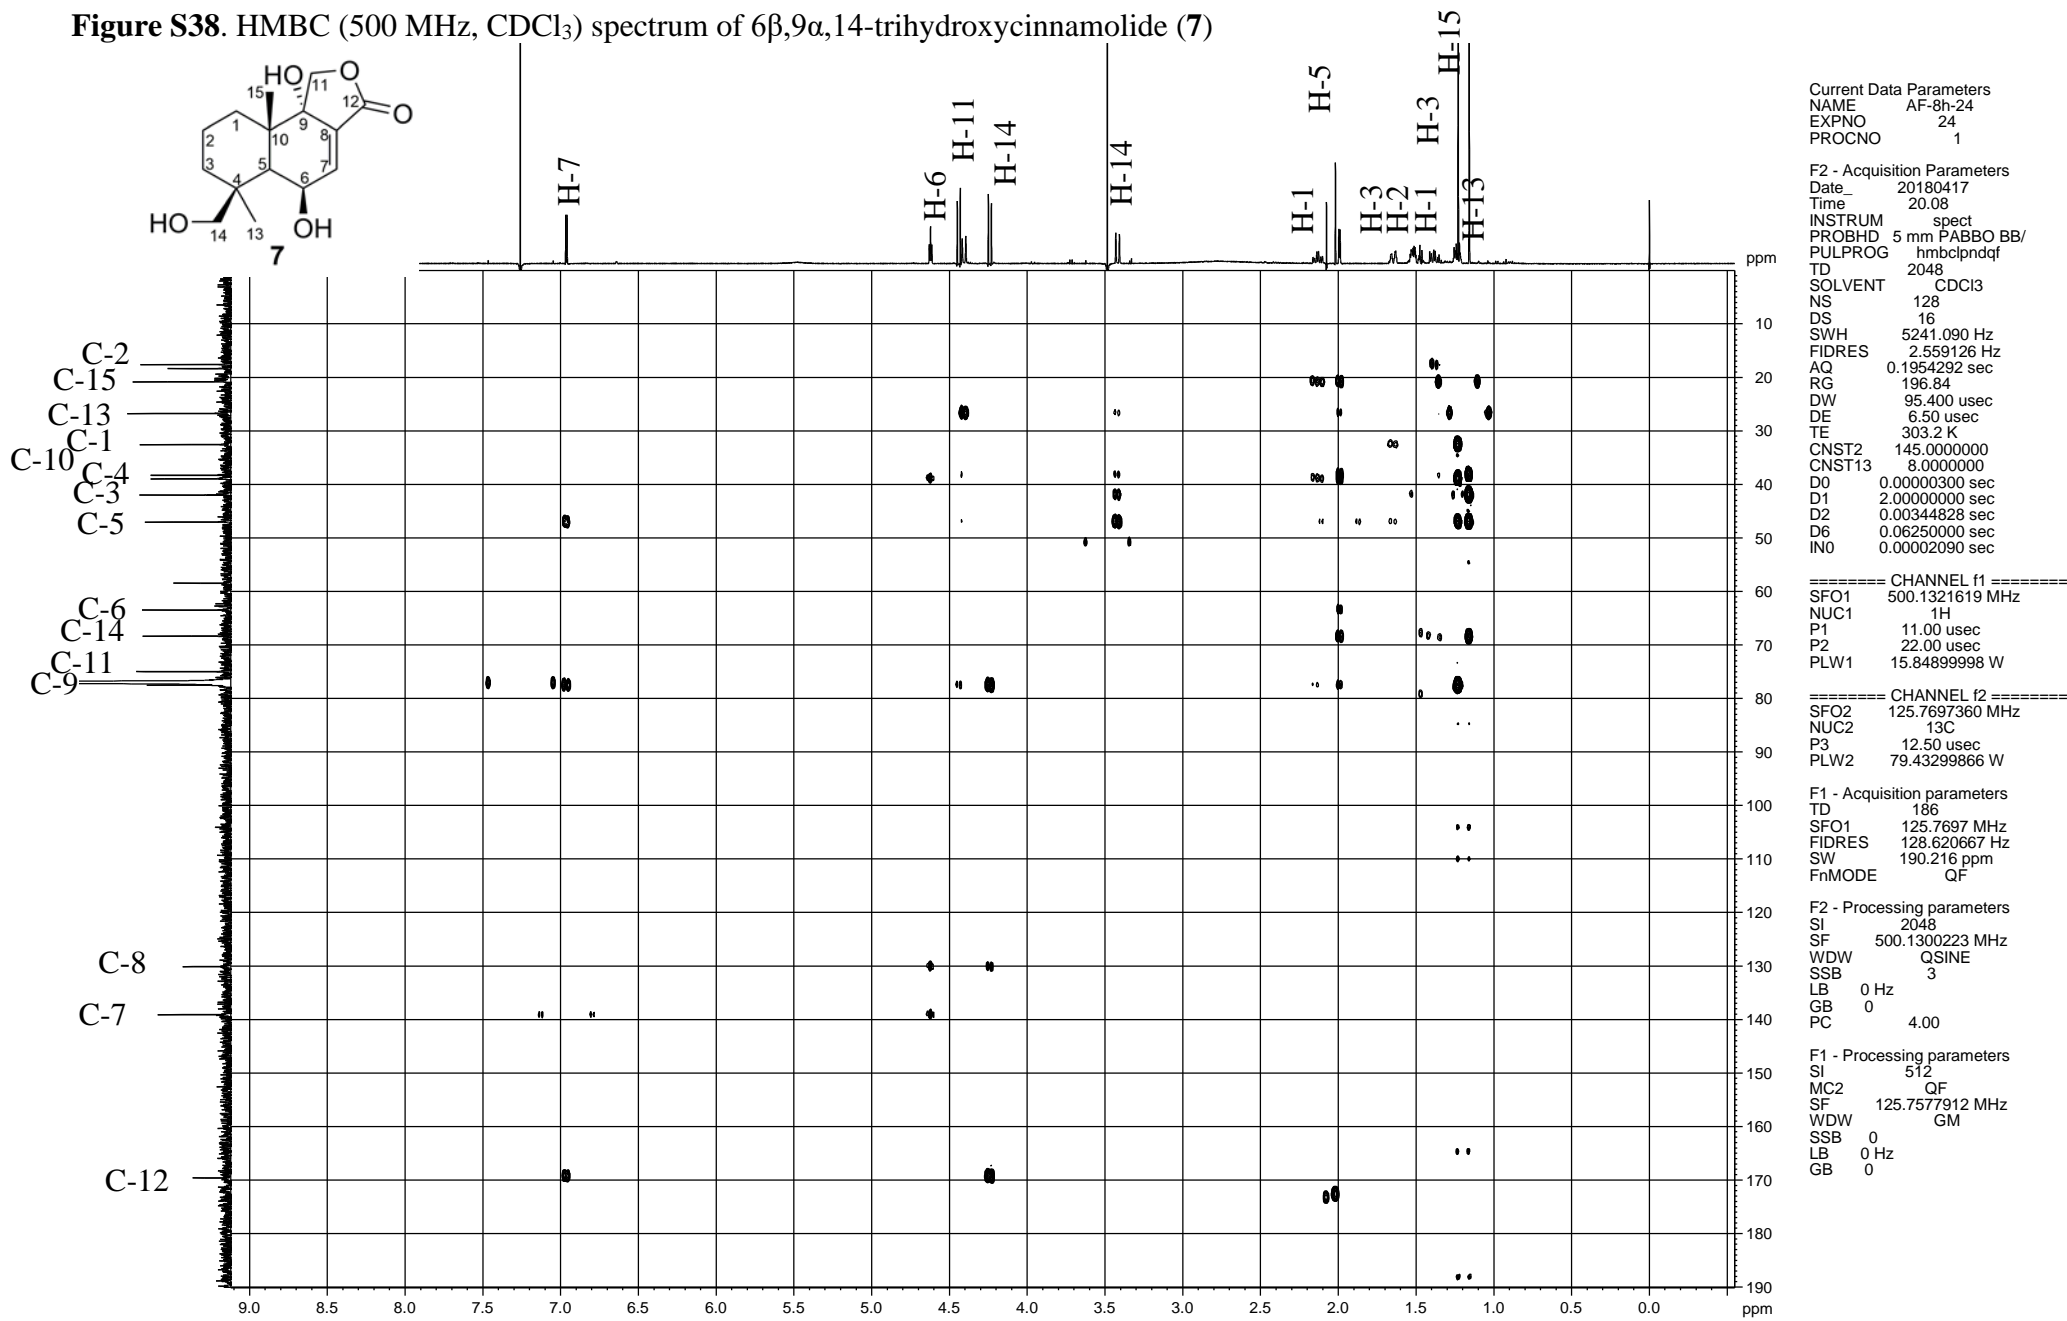

Figure S39. ROESY (500 MHz, CDCl<sub>3</sub>) spectrum of 6β,9α,14-trihydroxycinnamolide (7)

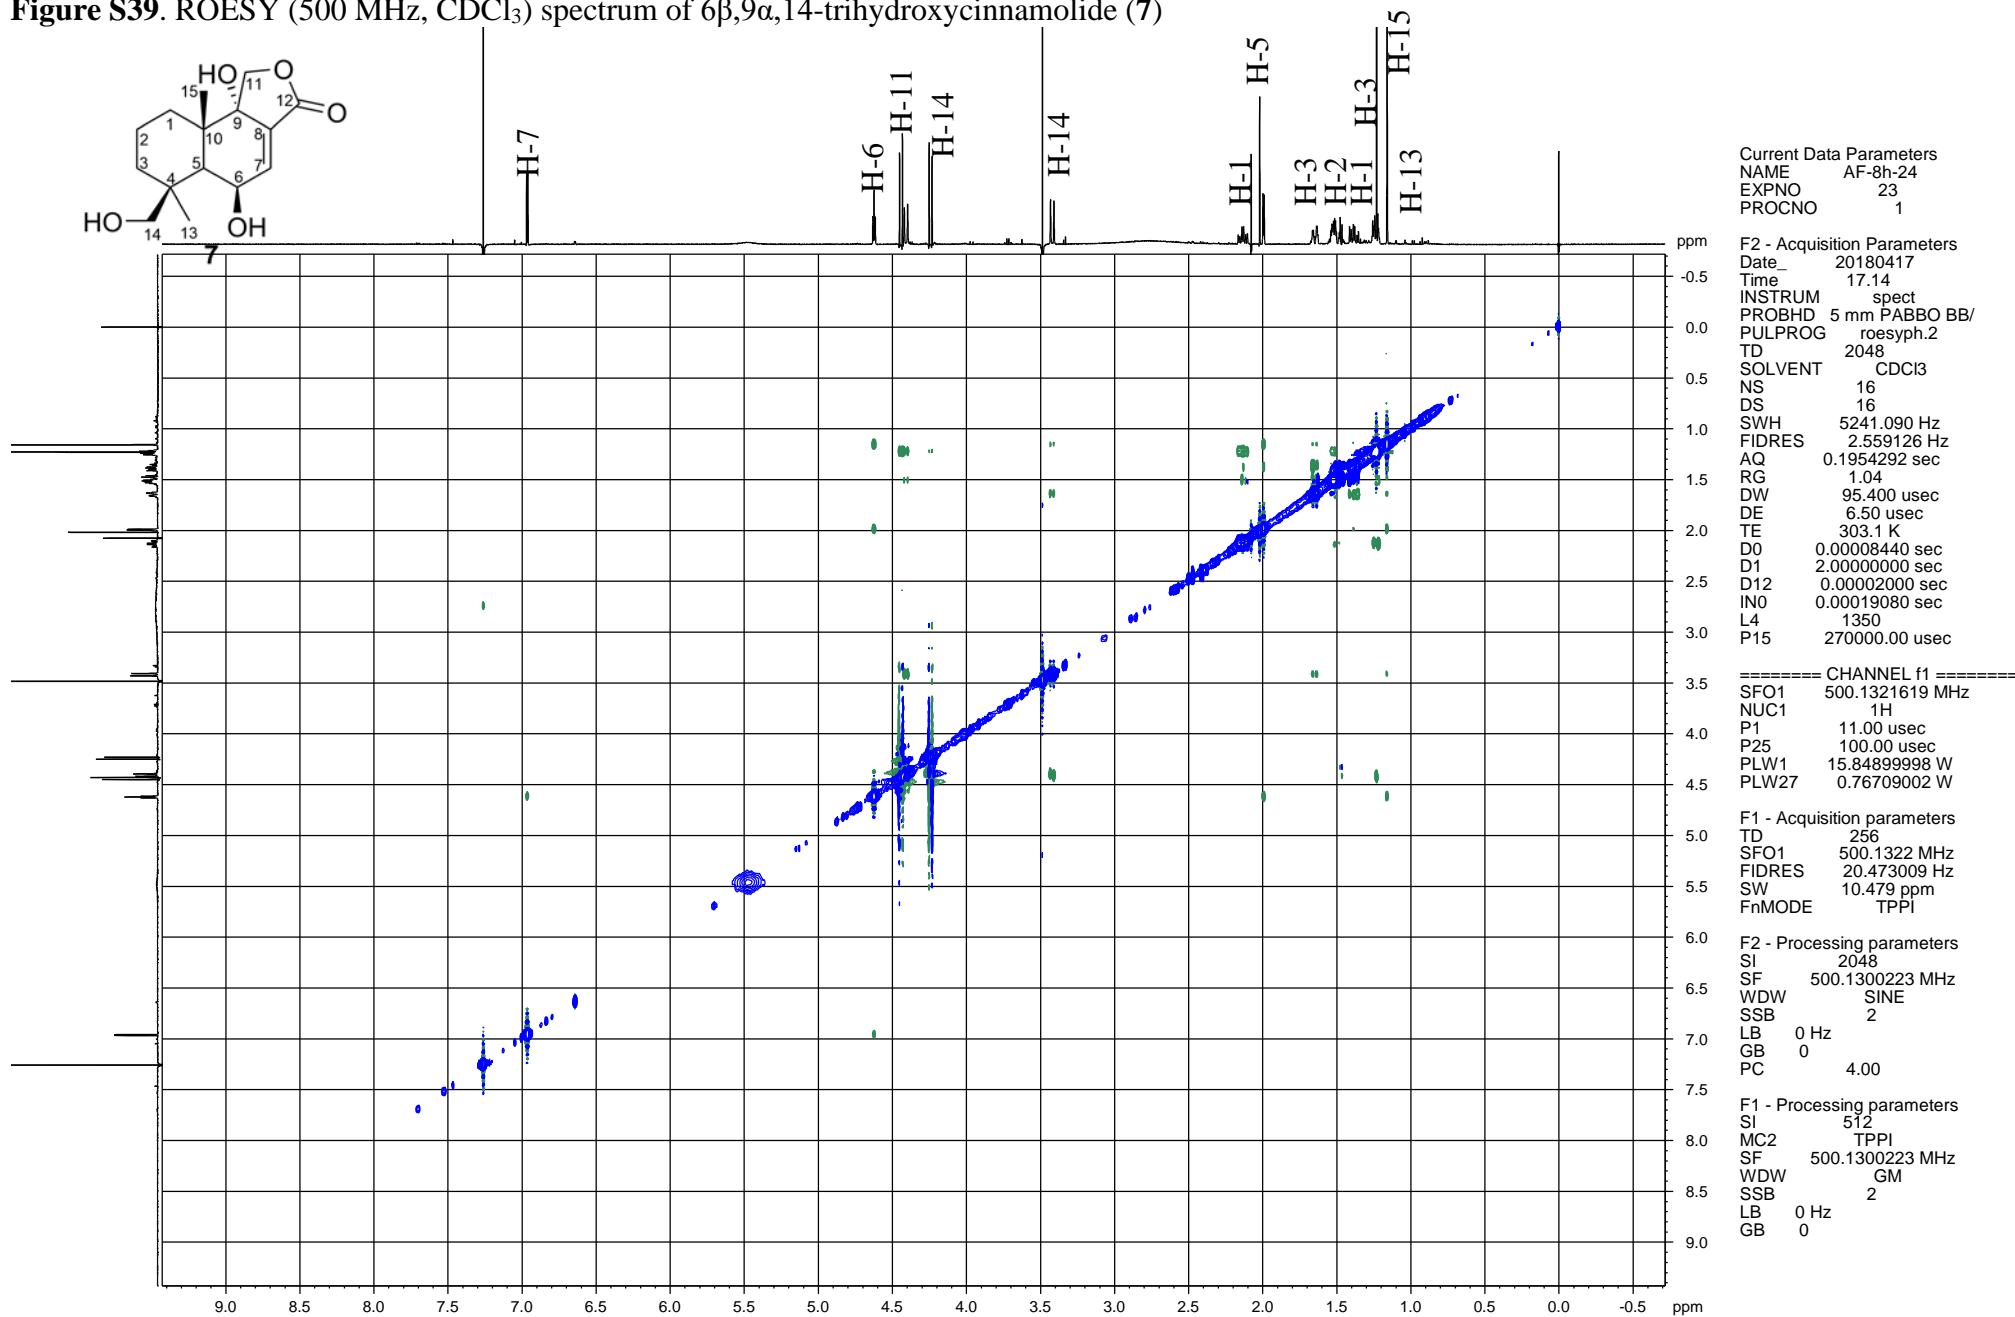

**Figure S40.** ECD spectrum of 6 $\beta$ ,9 $\alpha$ ,14-trihydroxycinnamolide (**7**) in methanol

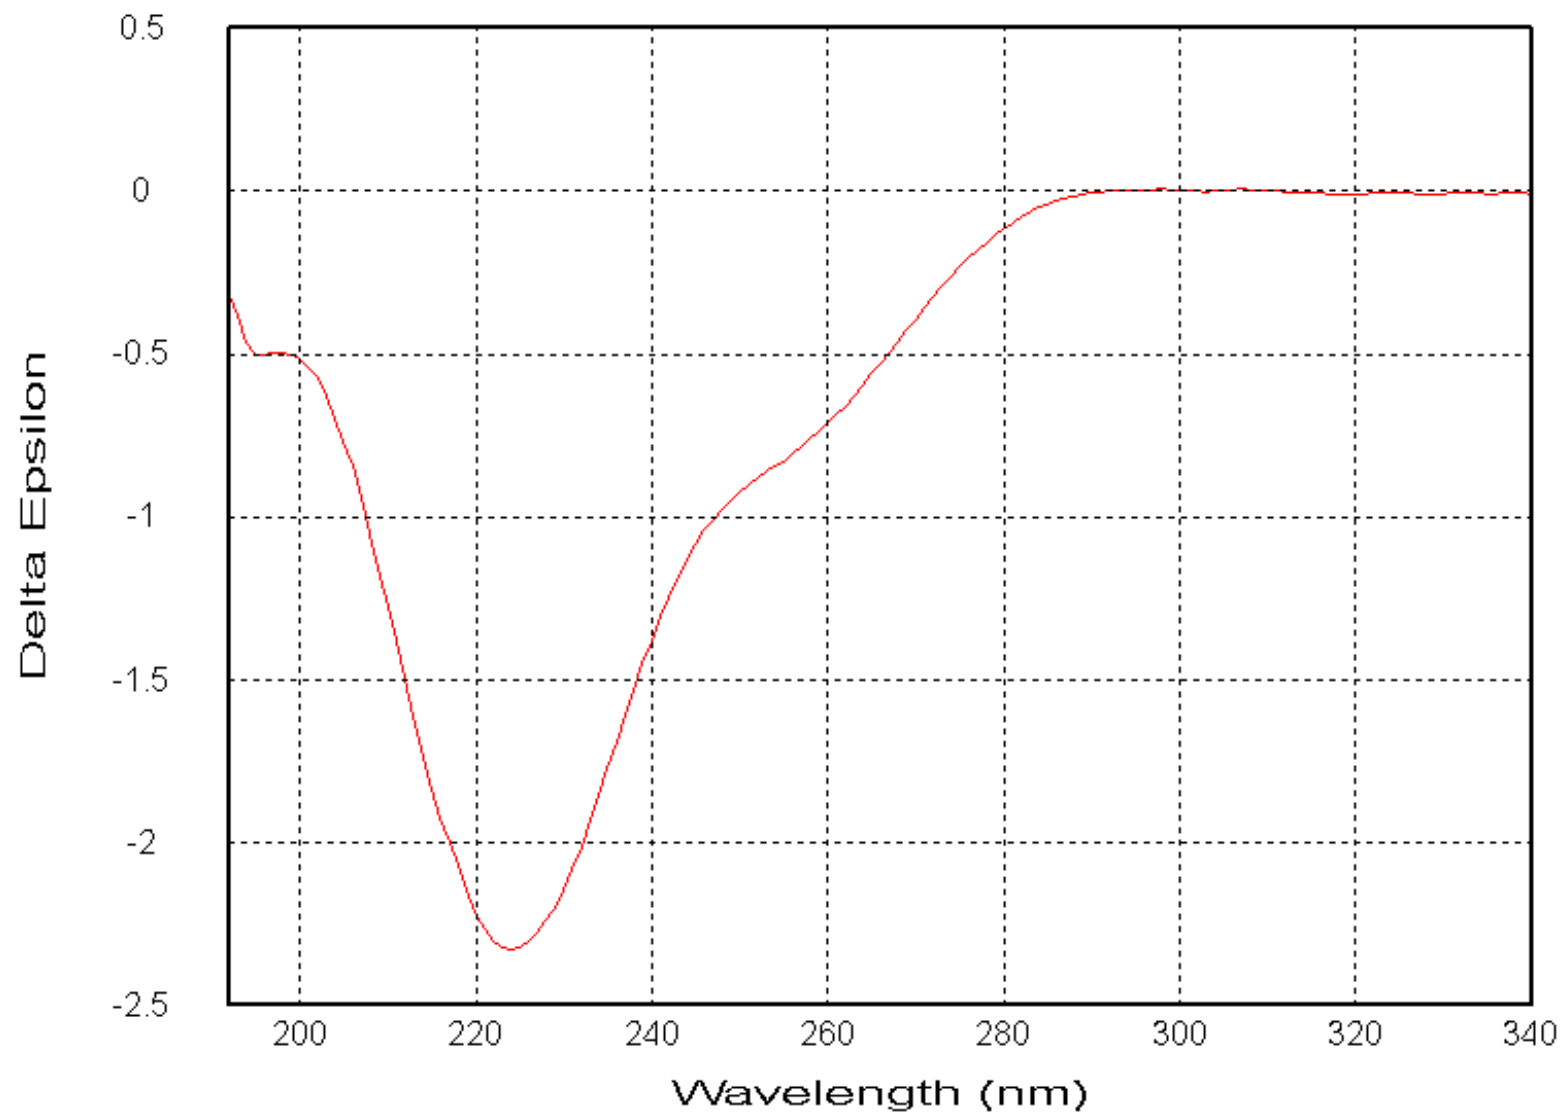

**Figure S41.**  $^1\text{H}$  NMR (500 MHz, acetone- $d_6$ ) spectrum of insulicolide A (**8**)

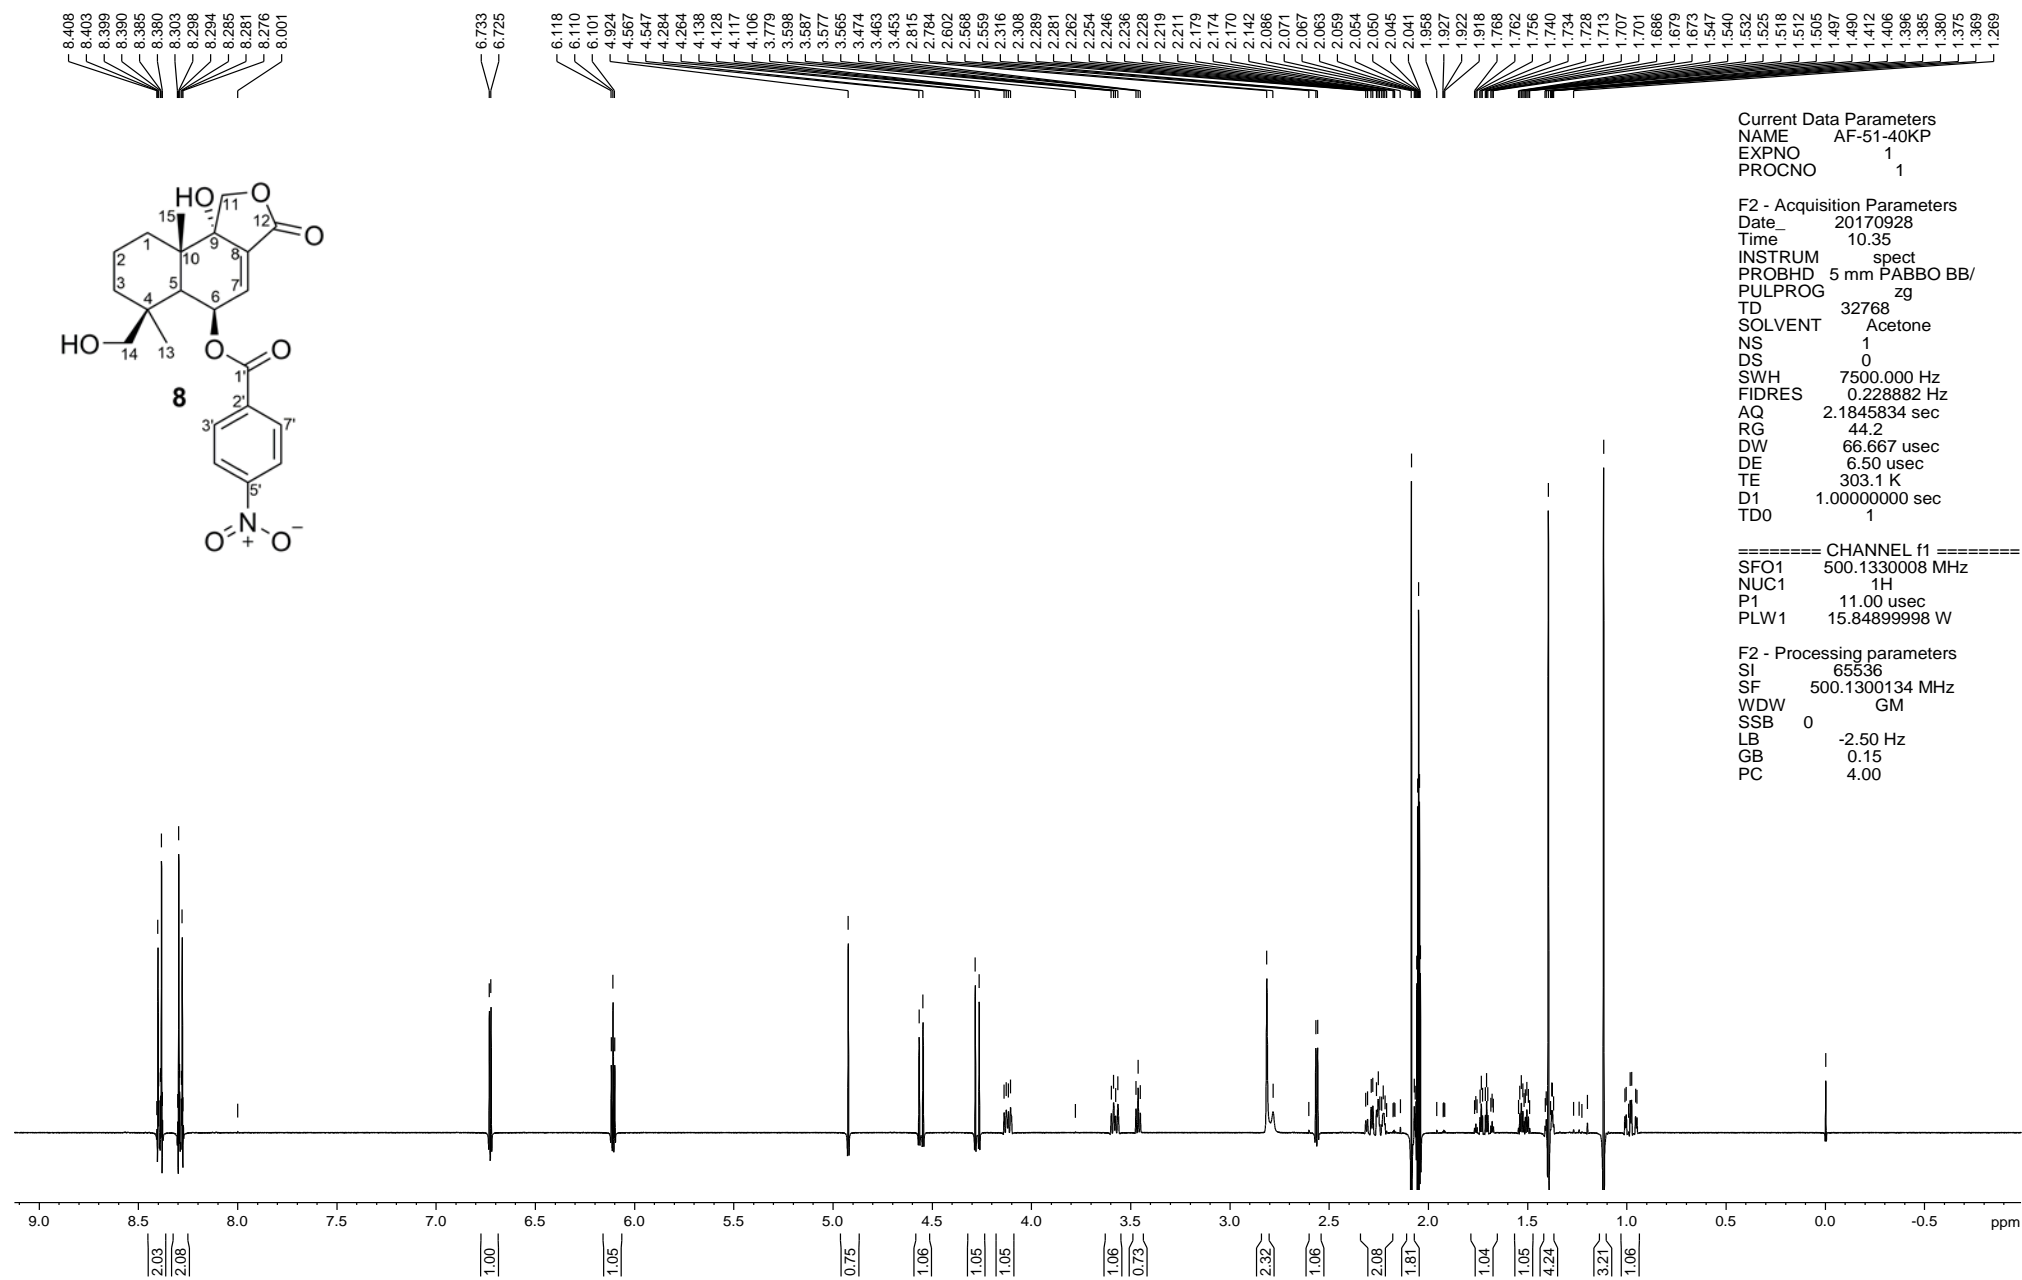

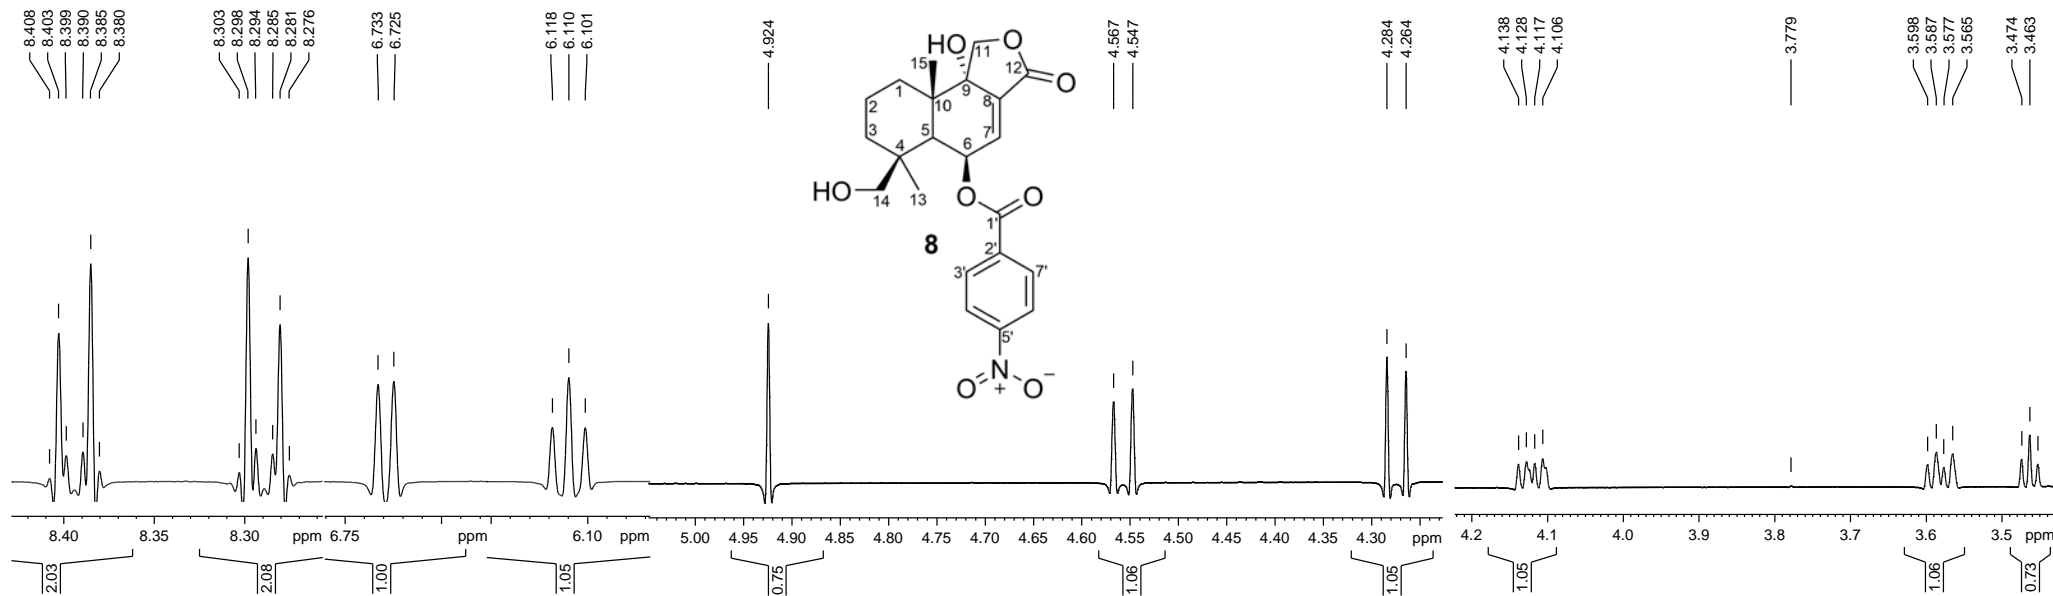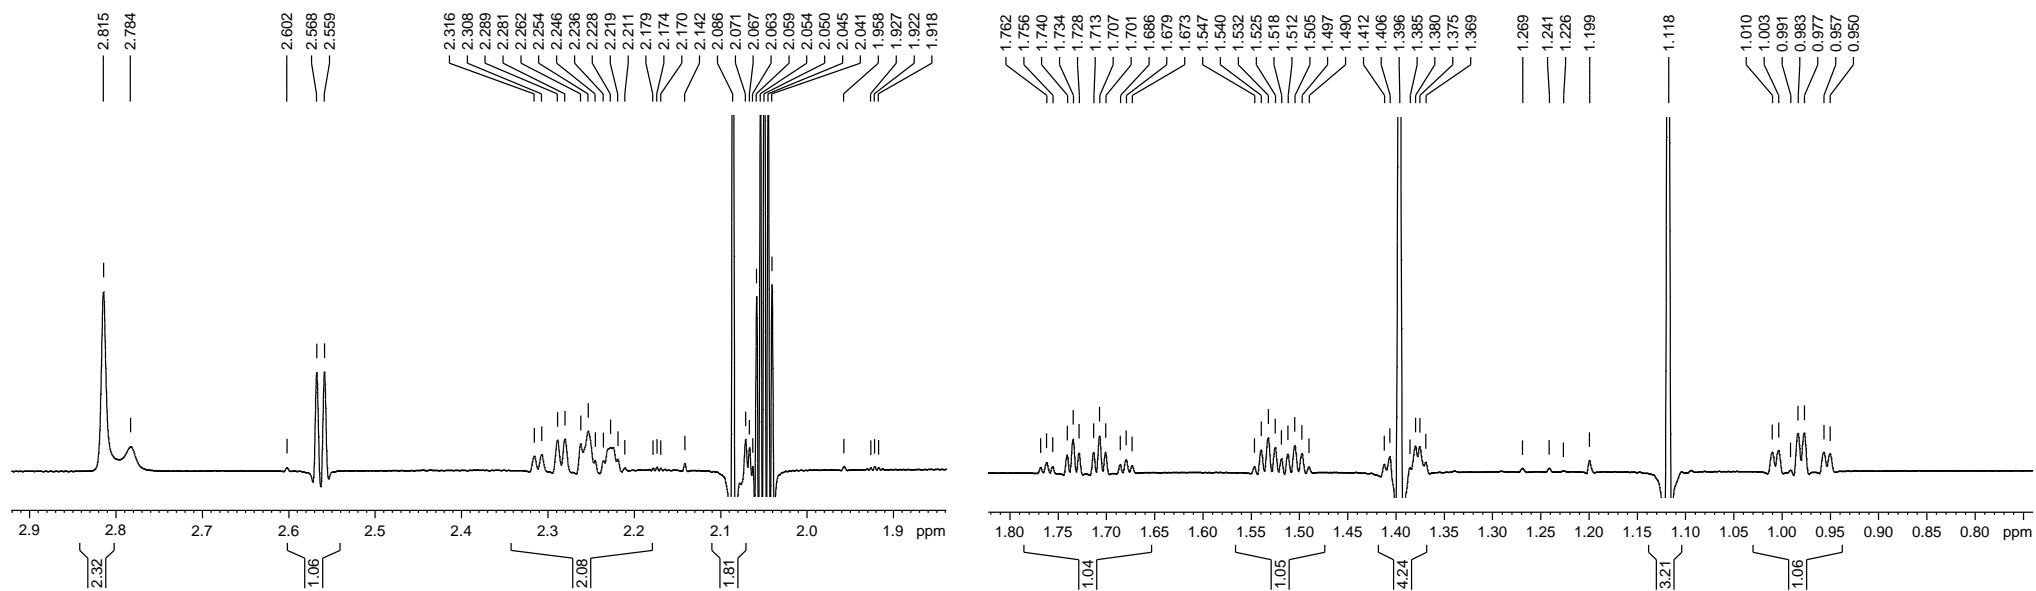

Figure S42.  $^{13}\text{C}$  NMR (125 MHz, acetone- $\text{d}_6$ ) spectrum of insulicolide A (**8**)

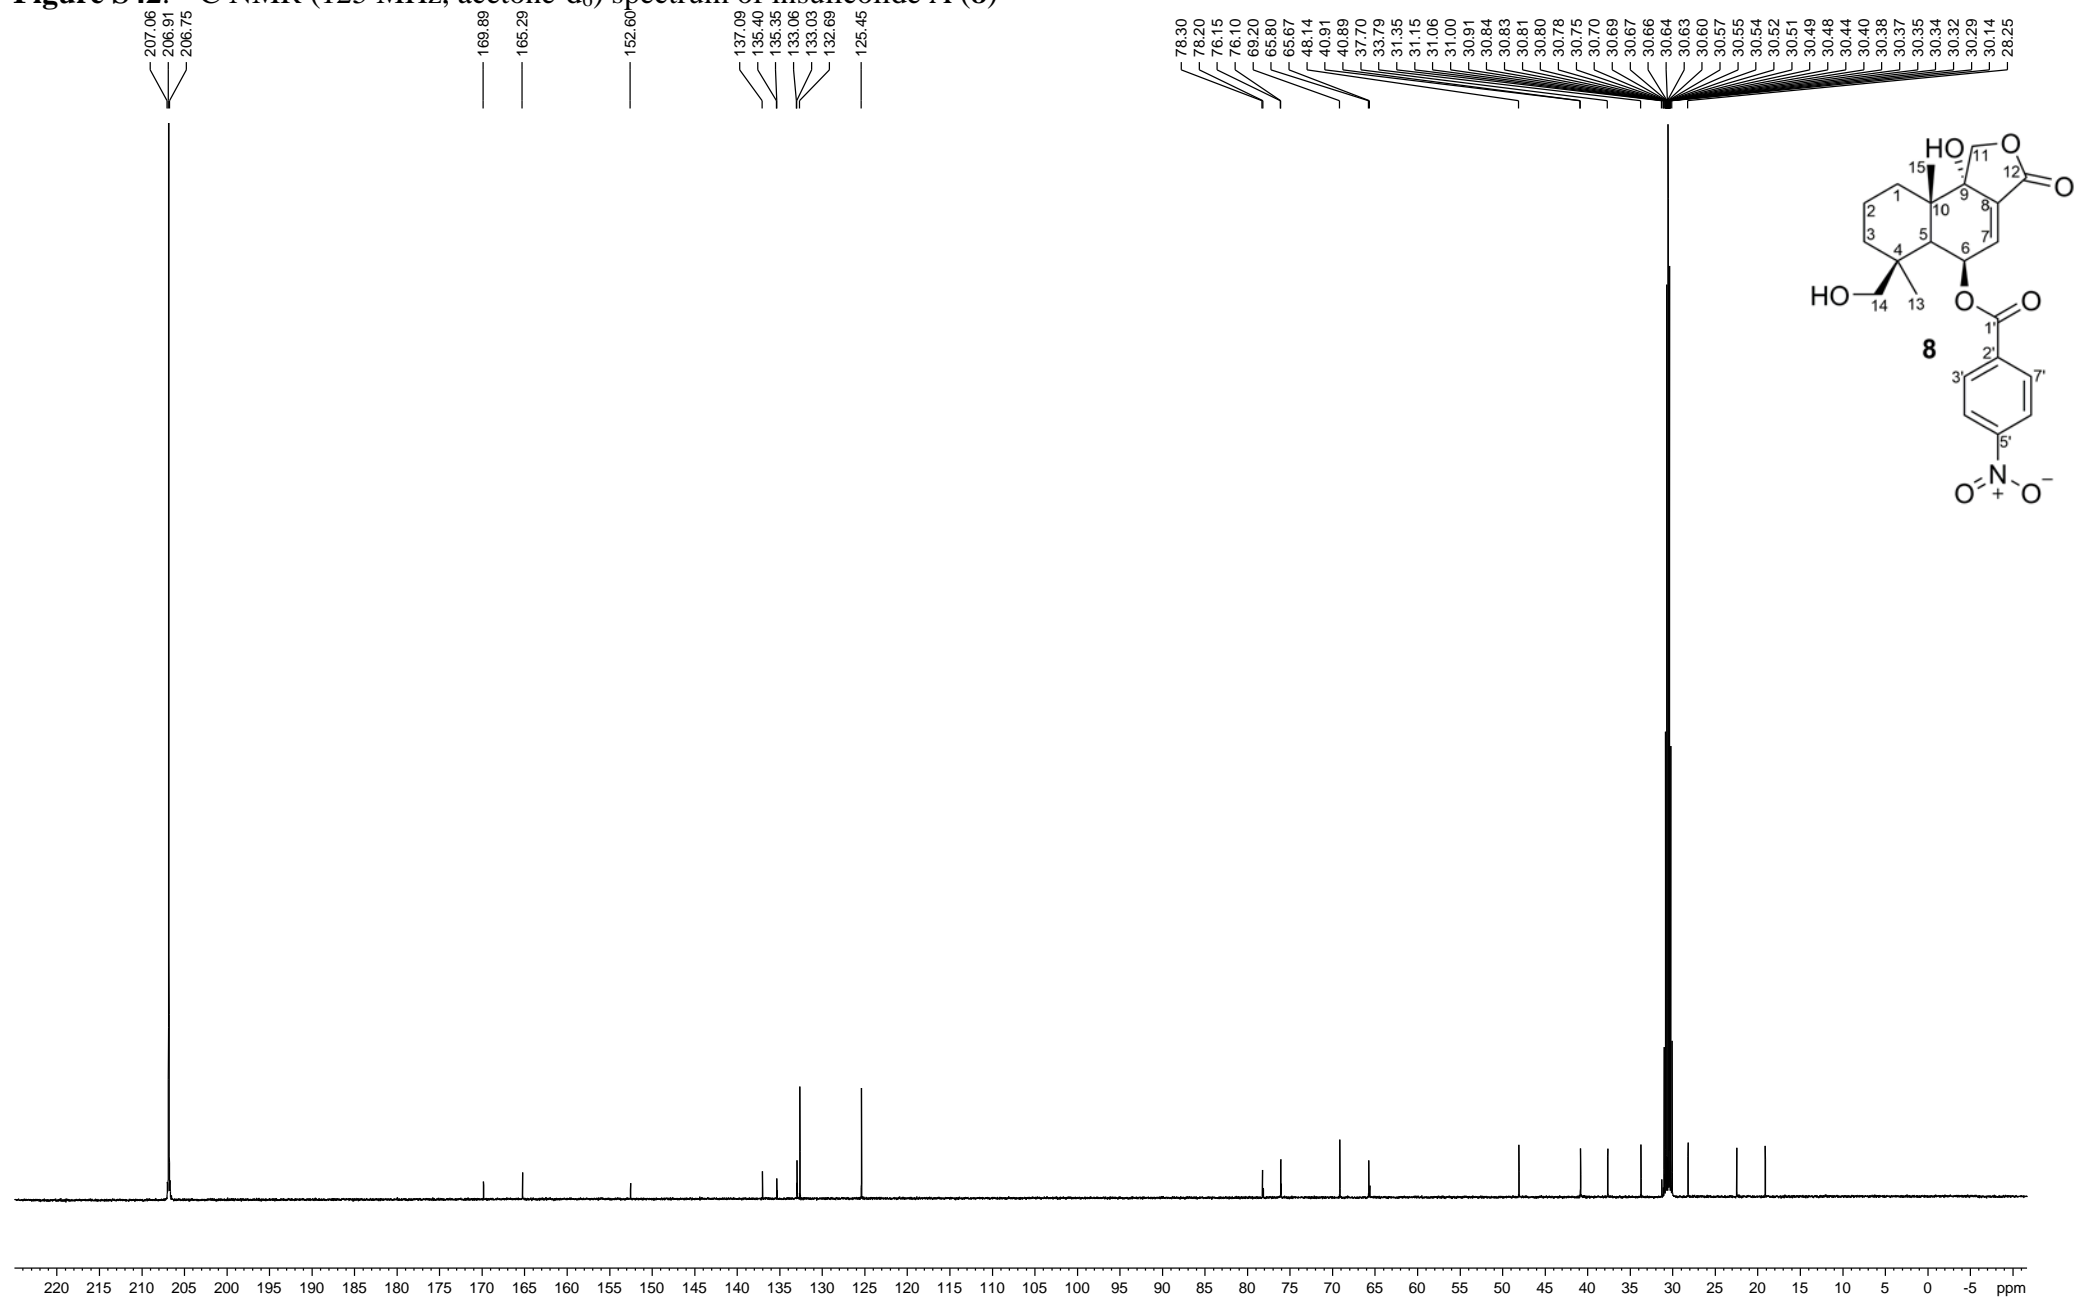

**Figure S43.** DEPT-135 (125 MHz, acetone- $d_6$ ) spectrum of insulicolide A (**8**)

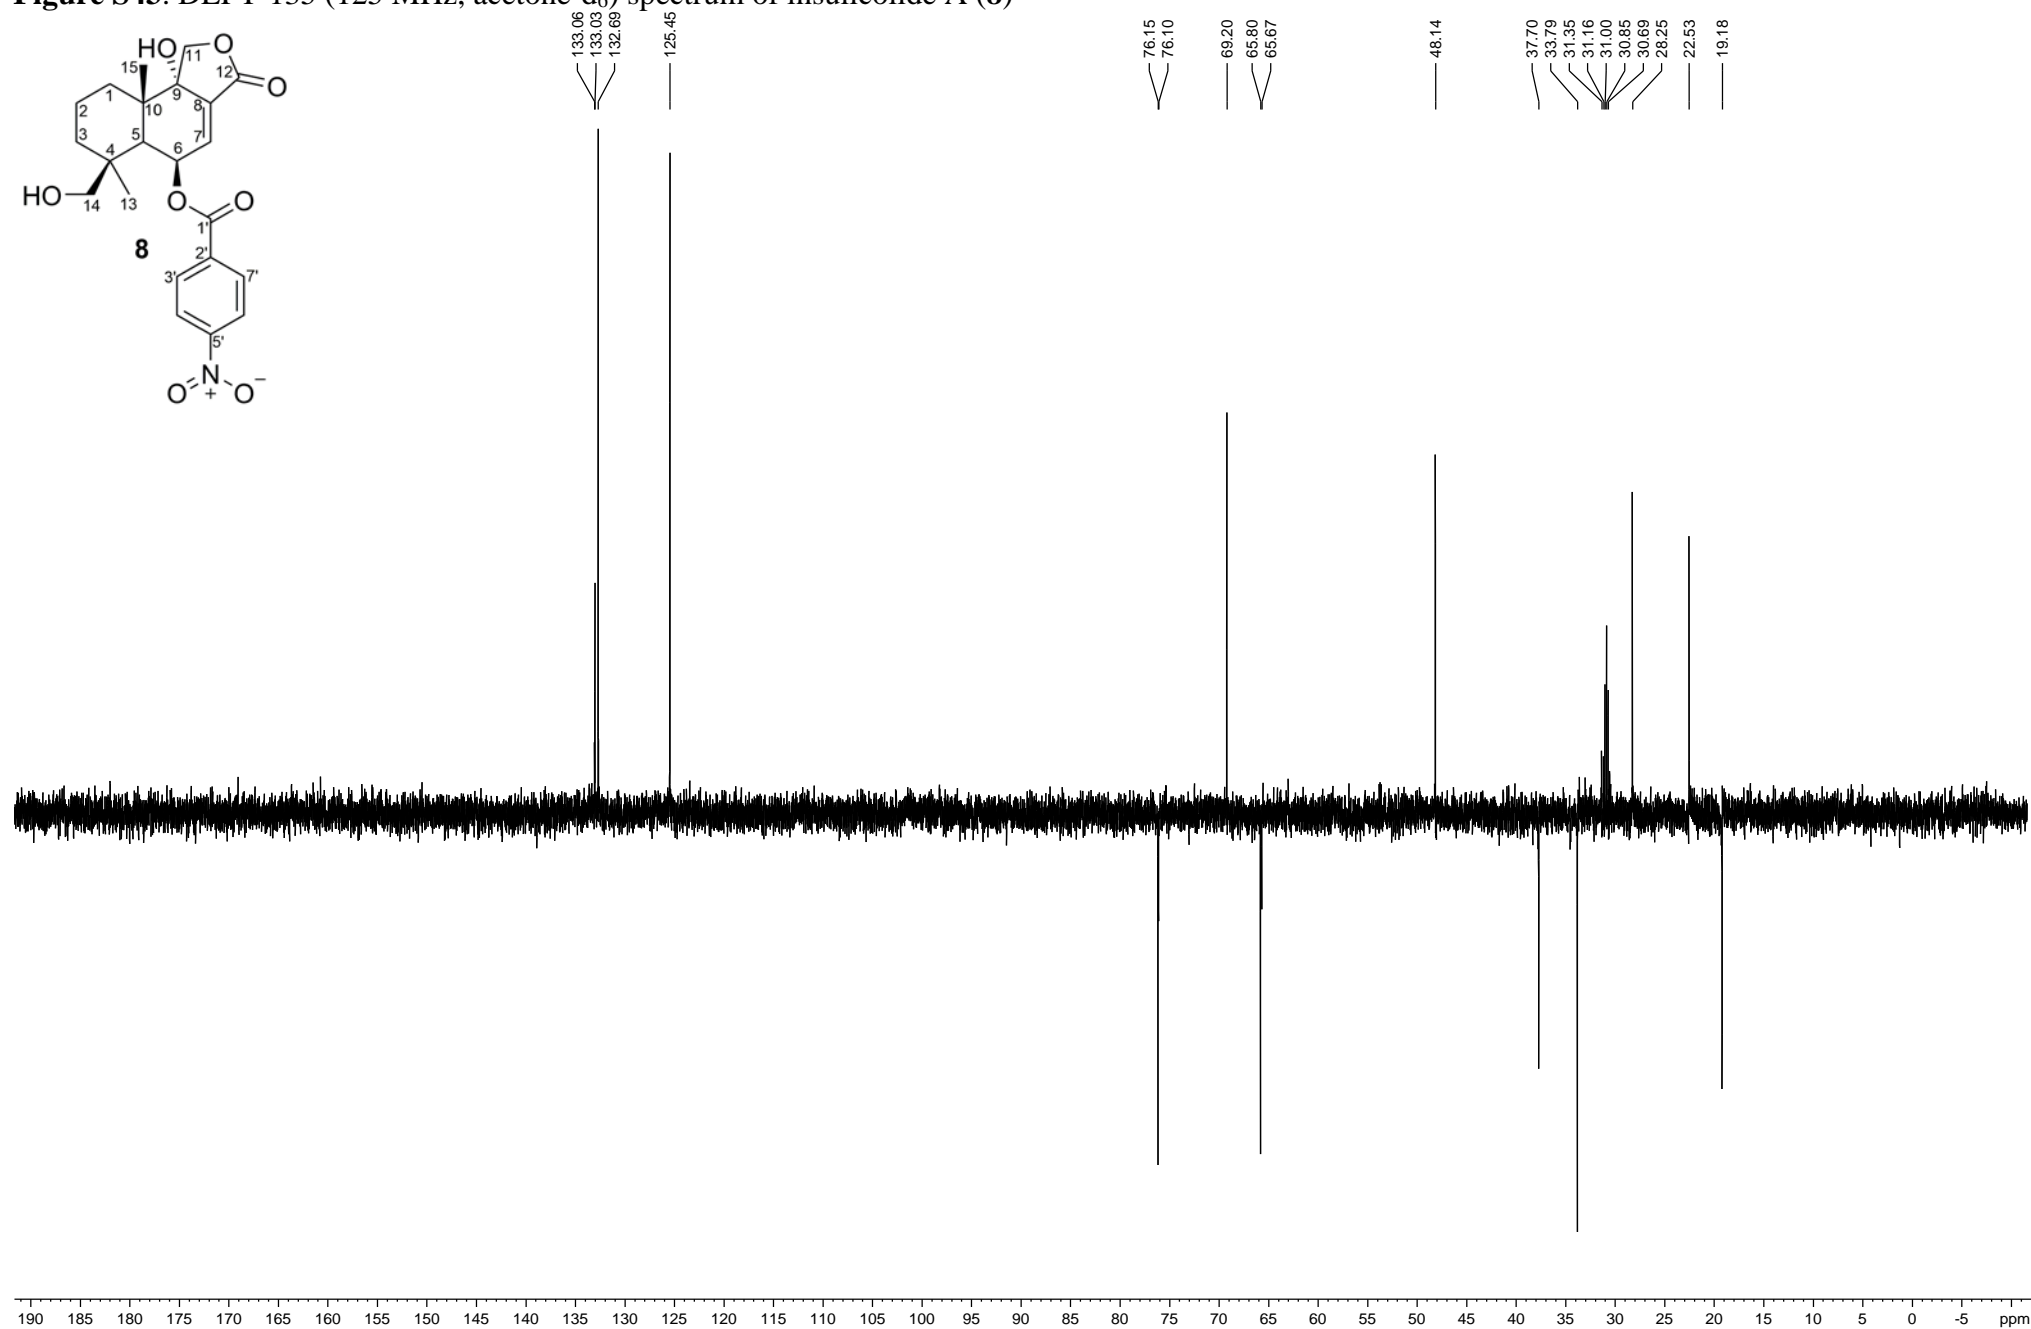



Figure S44. ECD spectrum of insulicolide A (**8**) in methanol

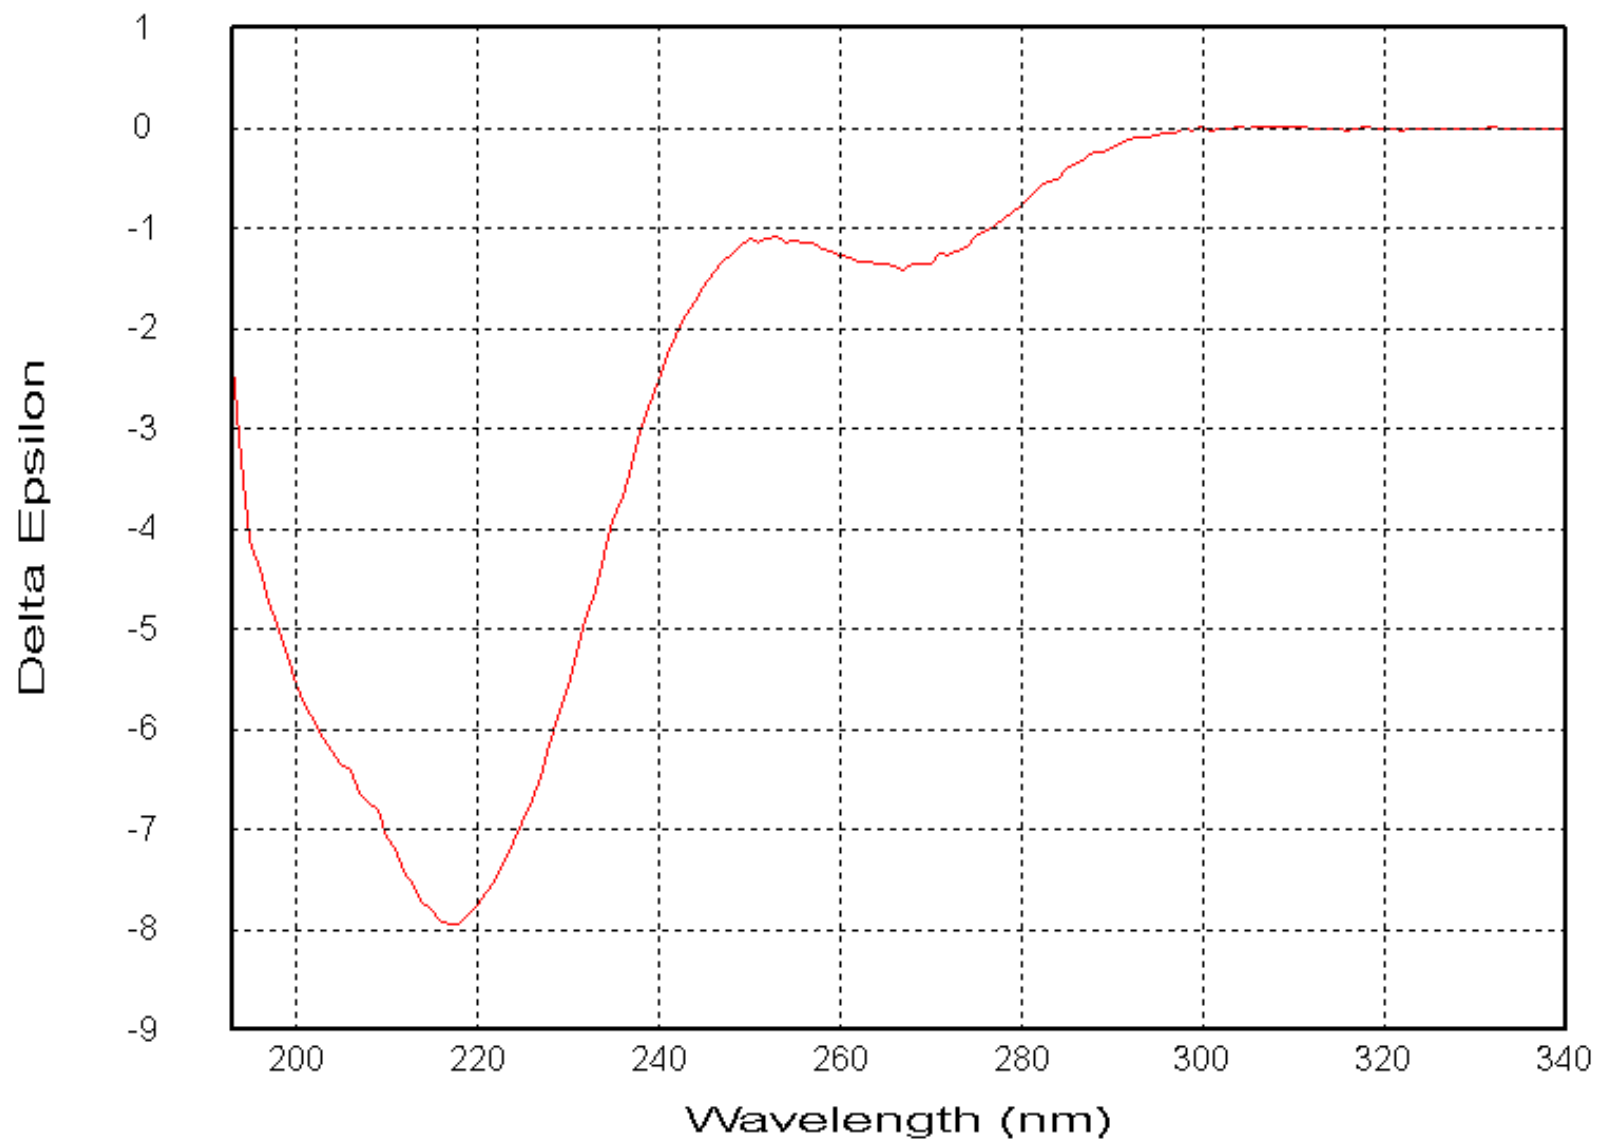

**Figure S45.**  $^1\text{H}$  NMR (700 MHz,  $\text{DMSO-d}_6$ ) spectrum of 6 $\beta$ ,7 $\alpha$ ,14-trihydroxyconfertifolin (**9**)

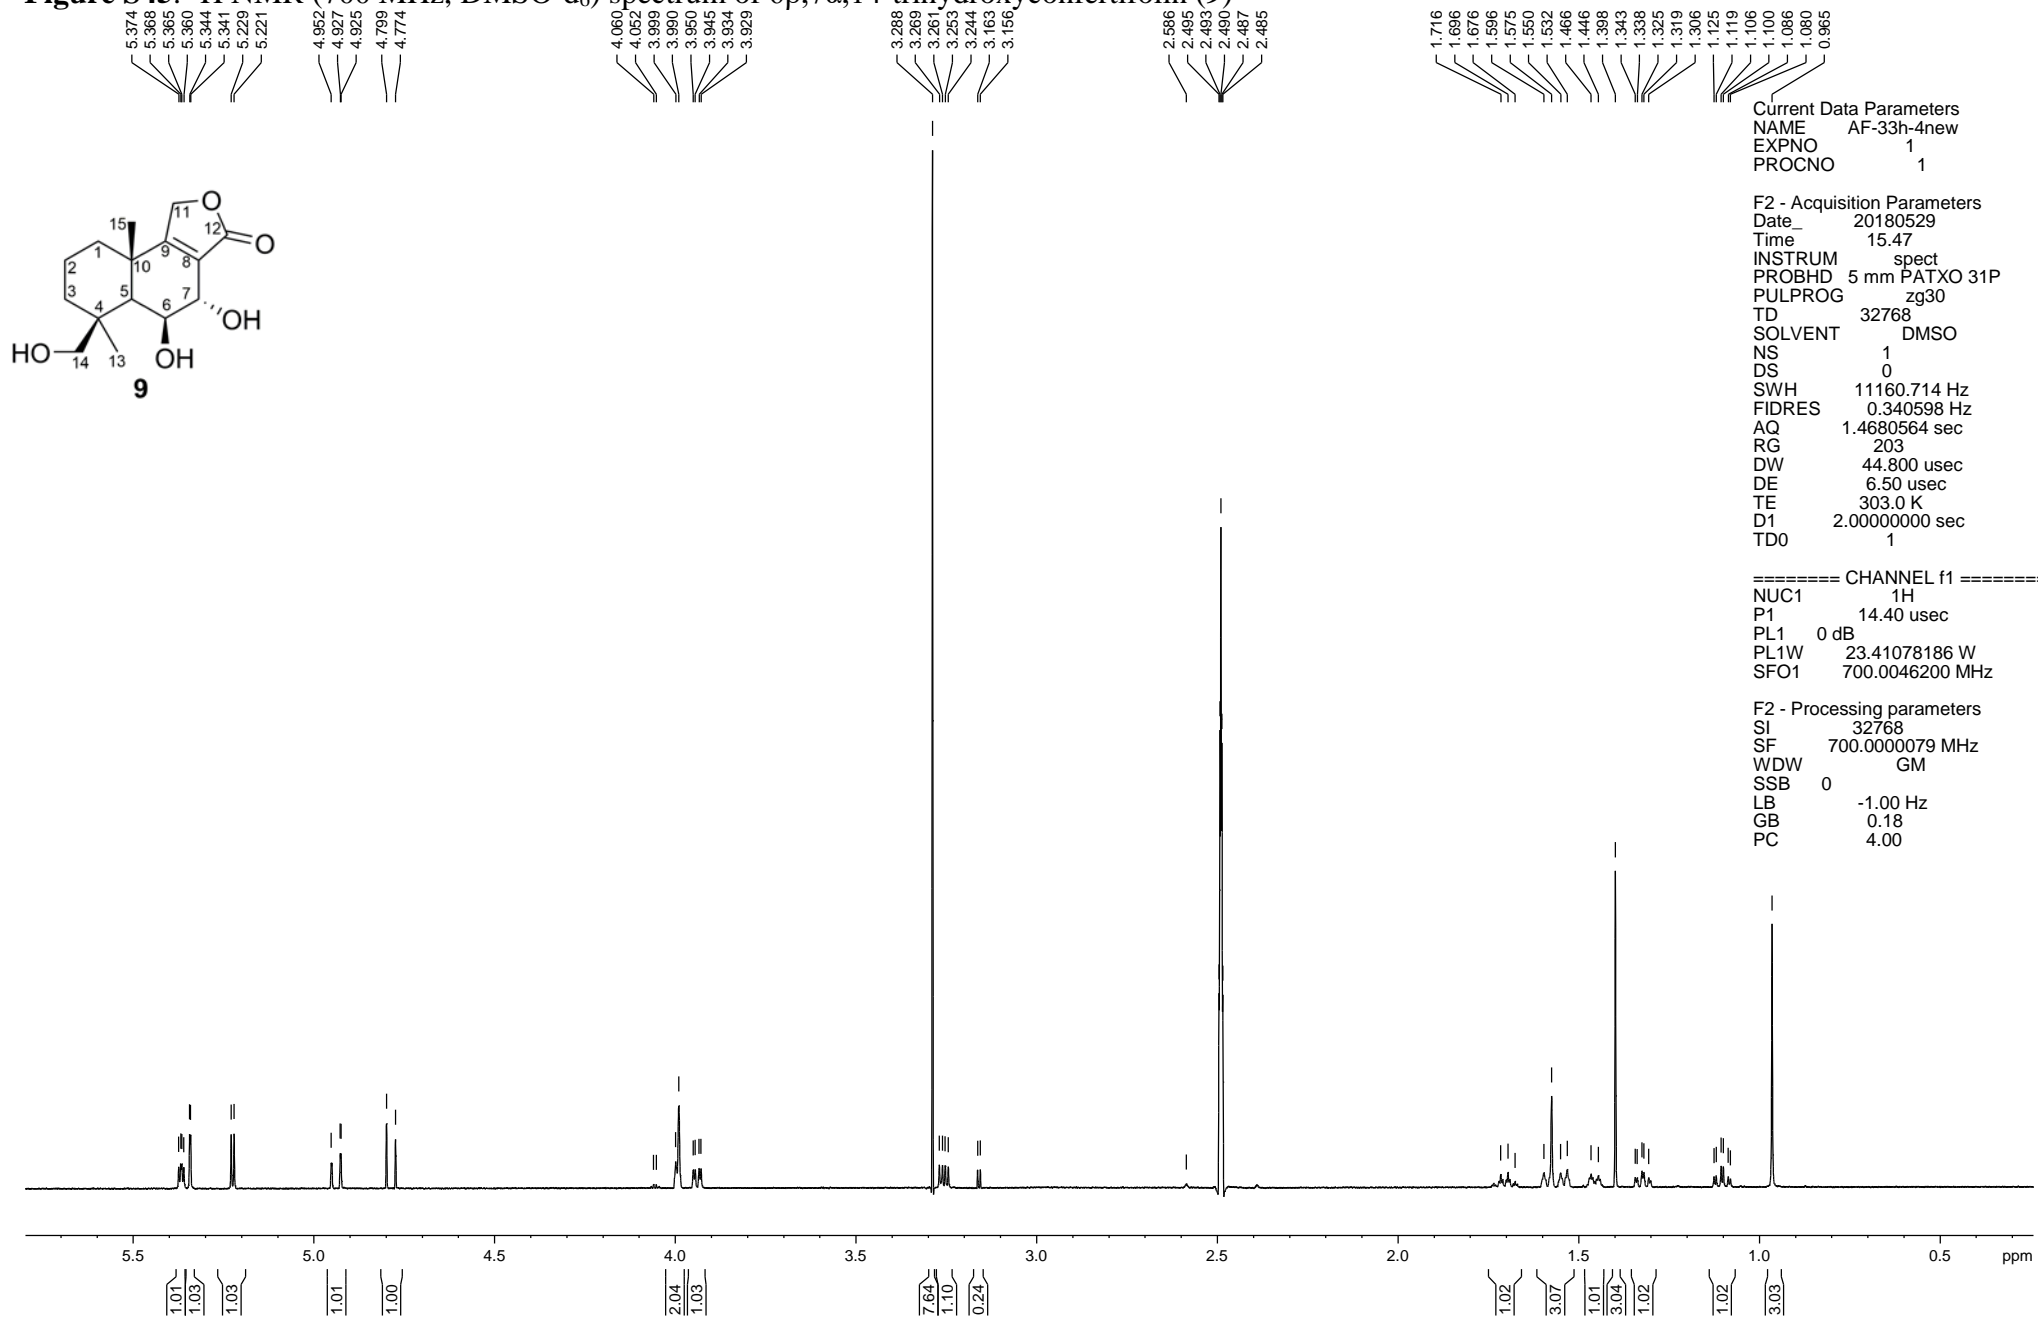

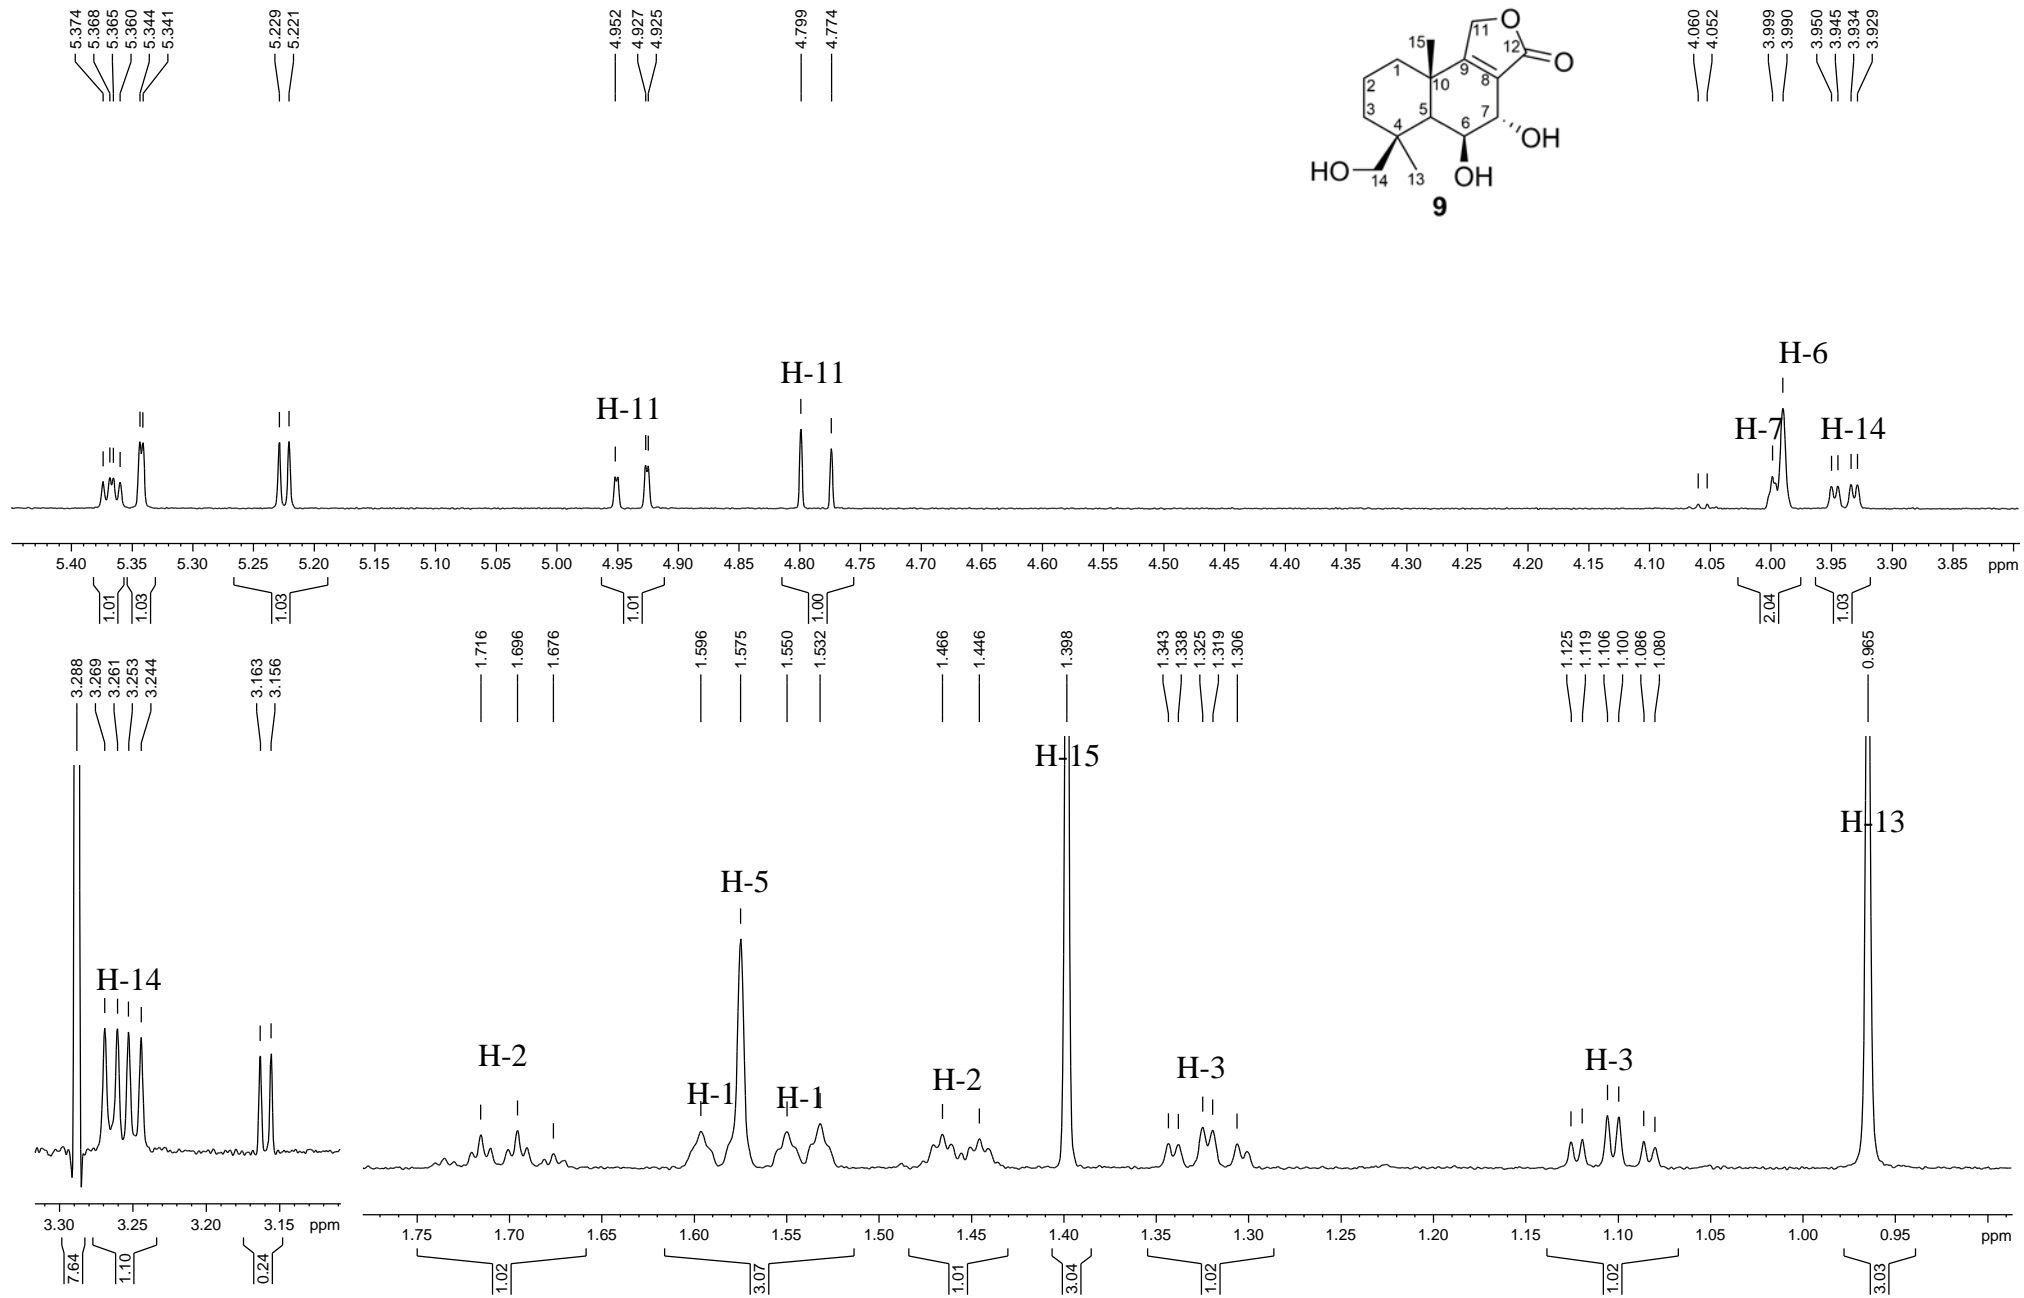

**Figure S46.**  $^{13}\text{C}$  NMR (125 MHz,  $\text{DMSO-d}_6$ ) spectrum of  $6\beta,7\alpha,14$ -trihydroxyconfertifolin (**9**)

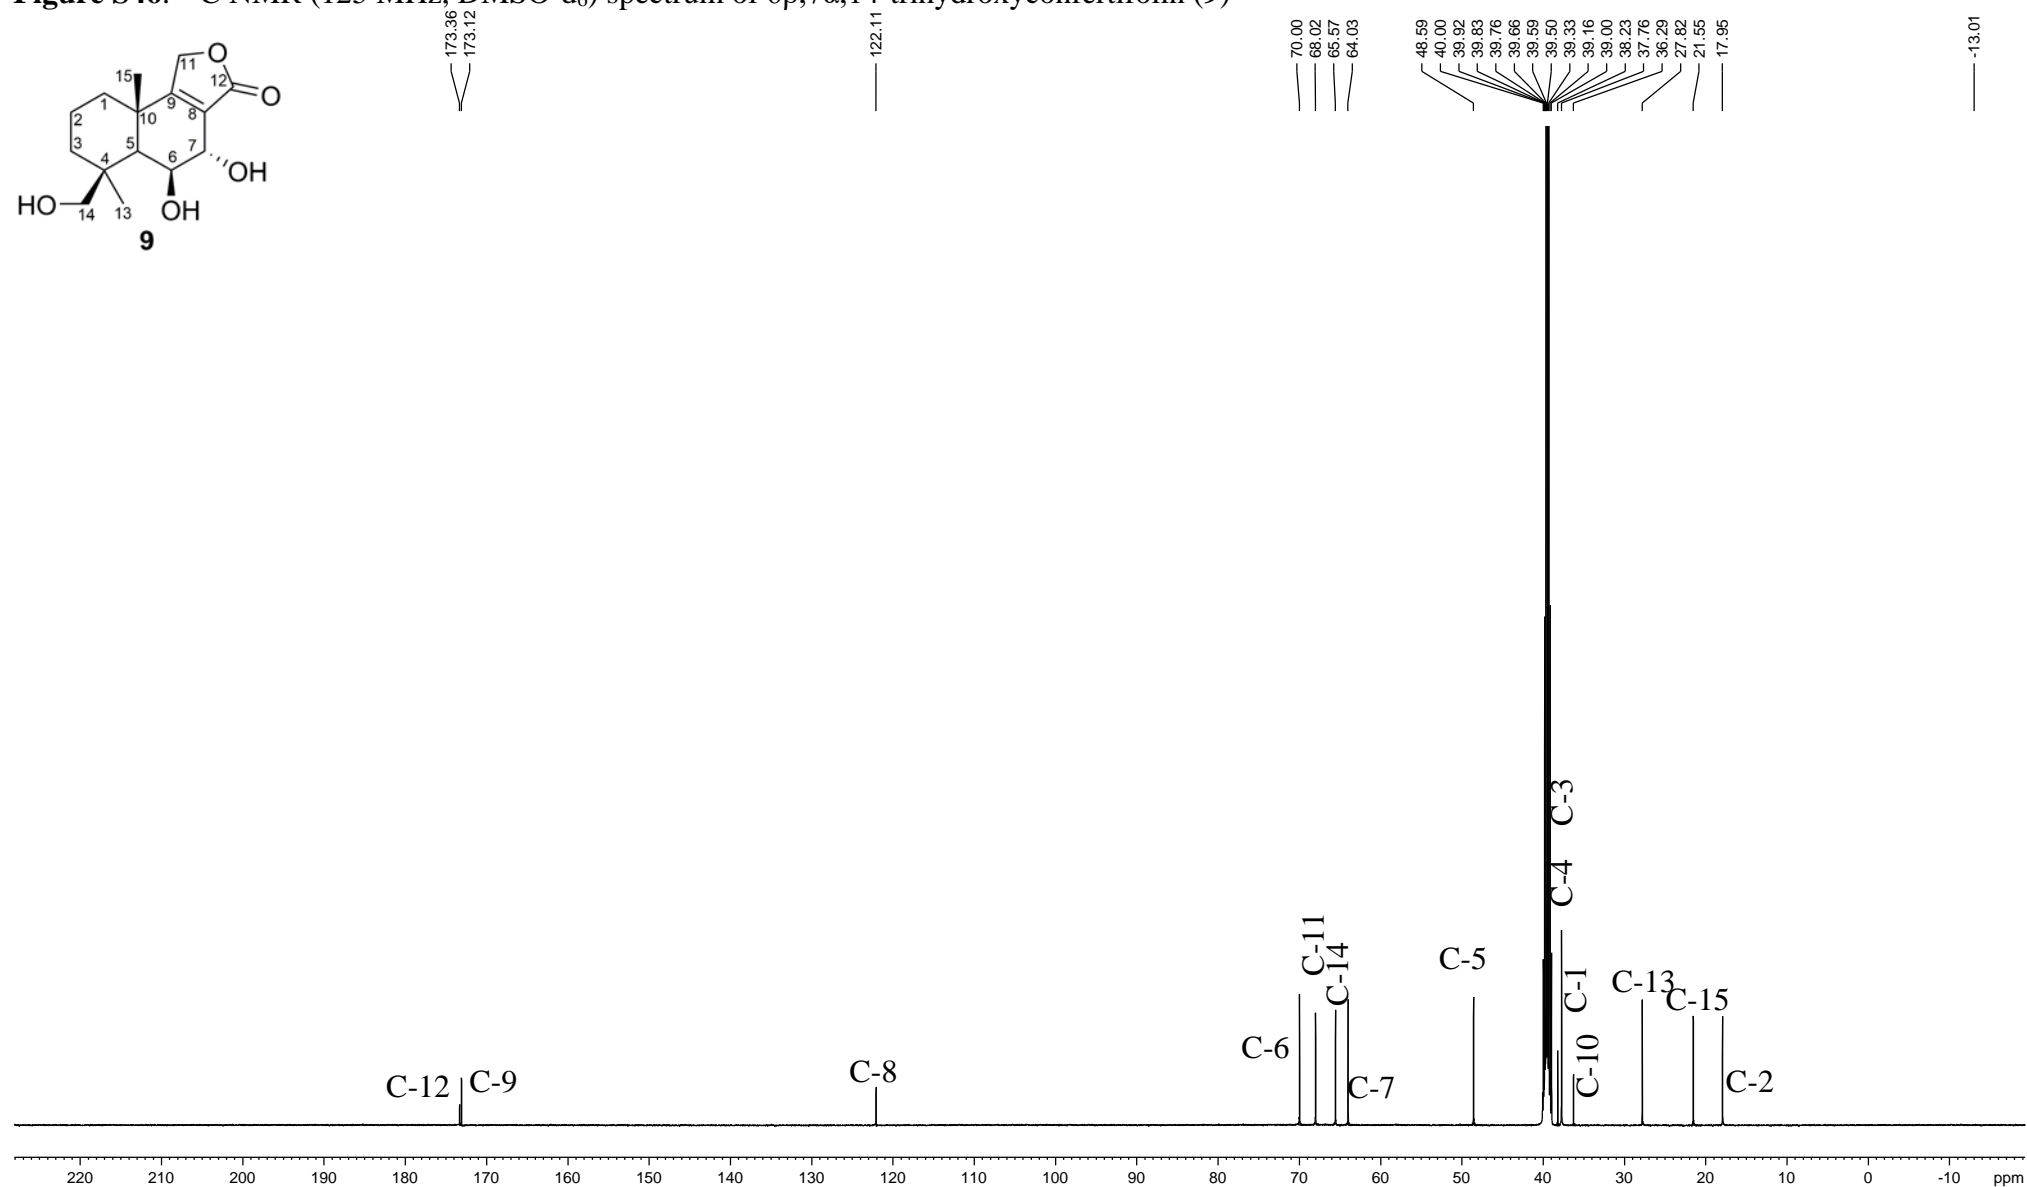

Figure S47. HSQC (700 MHz, DMSO-d<sub>6</sub>) spectrum of 6β,7α,14-trihydroxyconfertifolin (9)

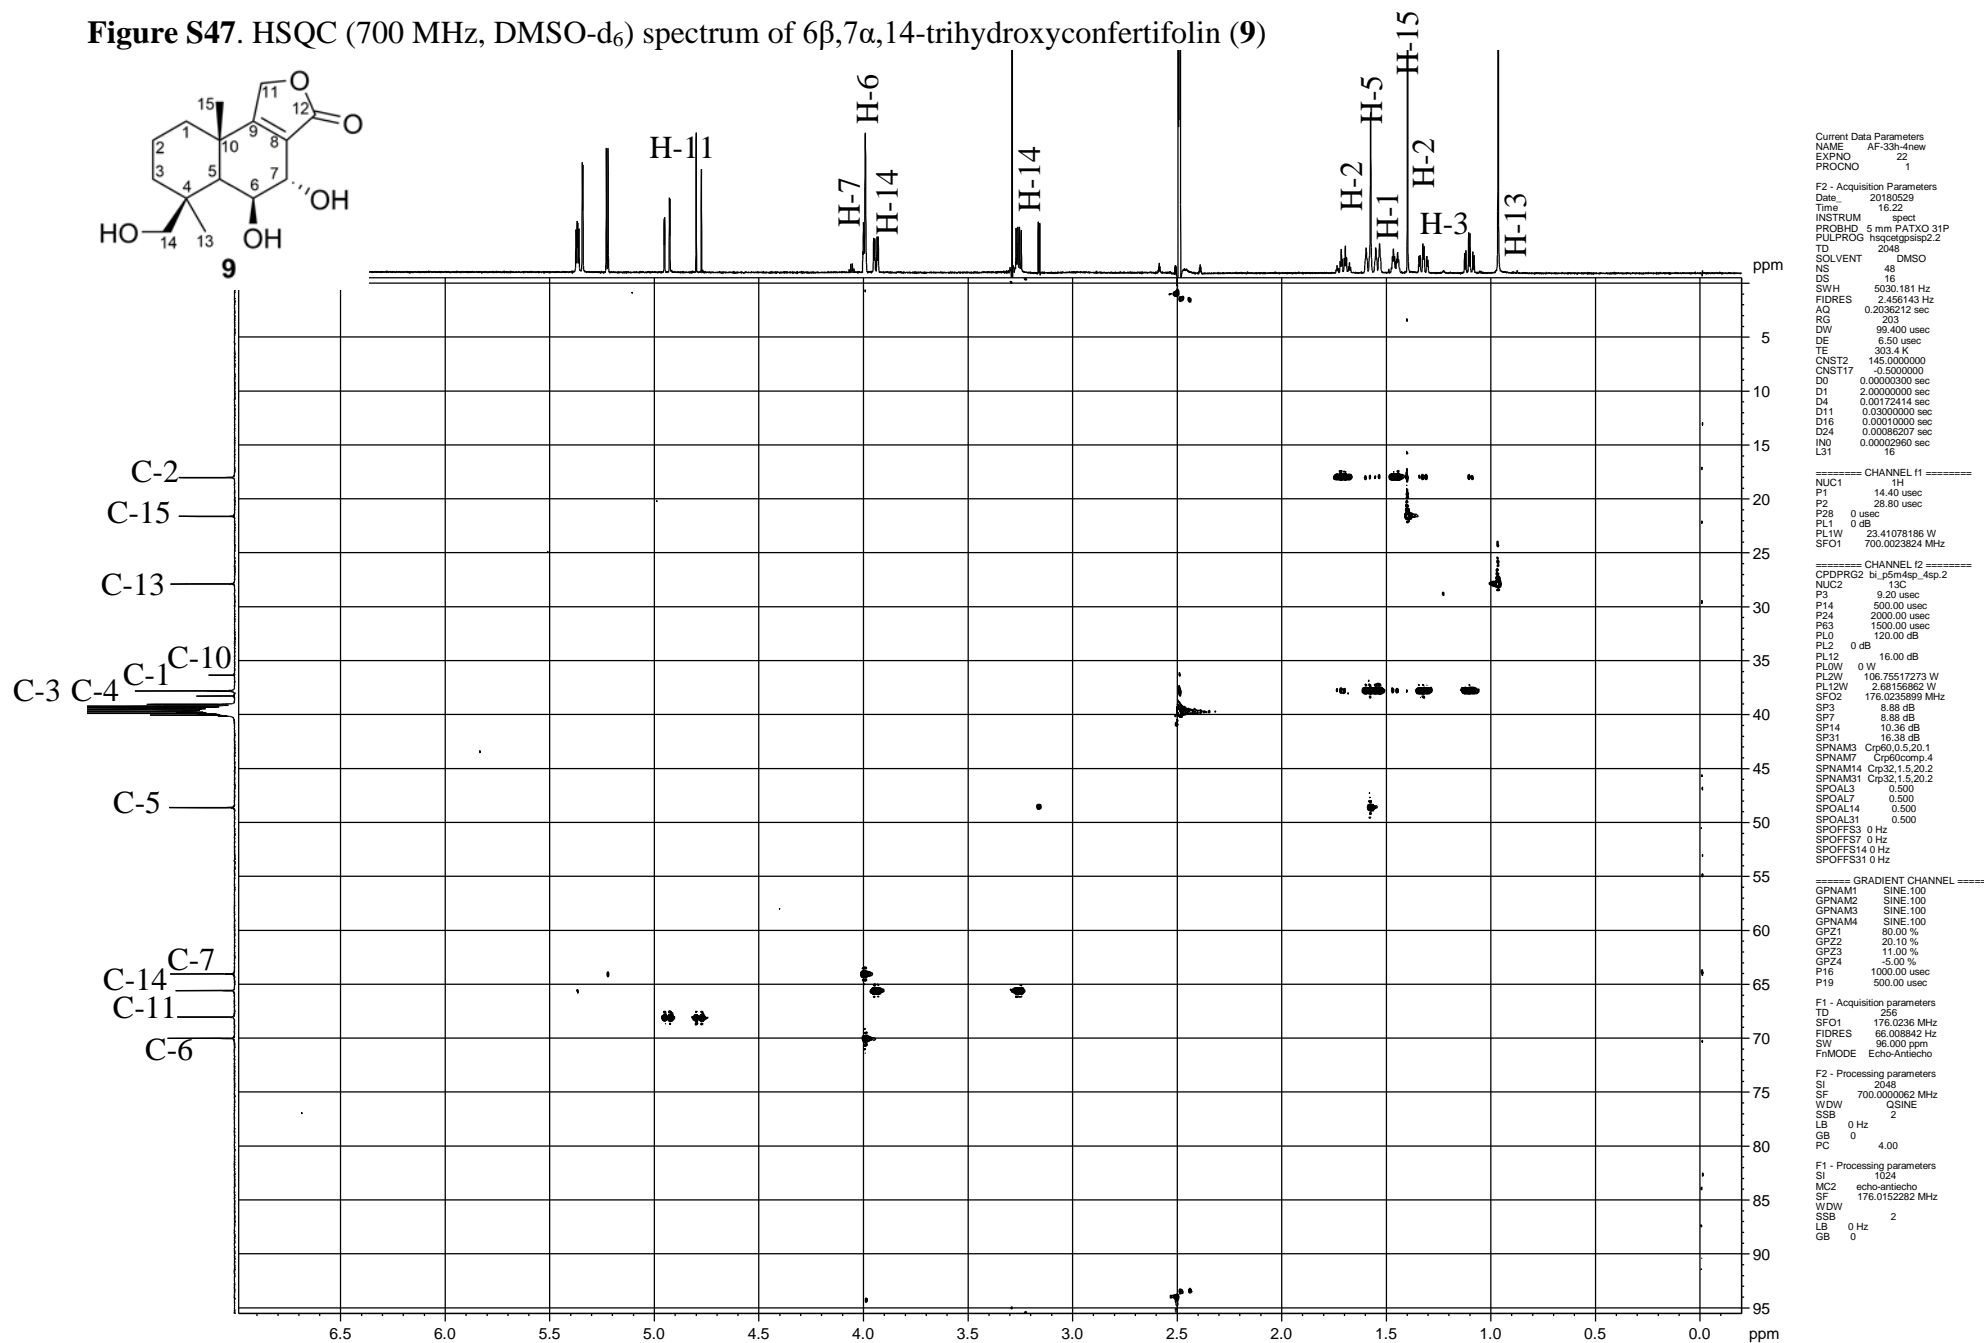

**Figure S48.** HMBC (500 MHz, DMSO-d<sub>6</sub>) spectrum of 6 $\beta$ ,7 $\alpha$ ,14-trihydroxyconfertifolin (**9**)

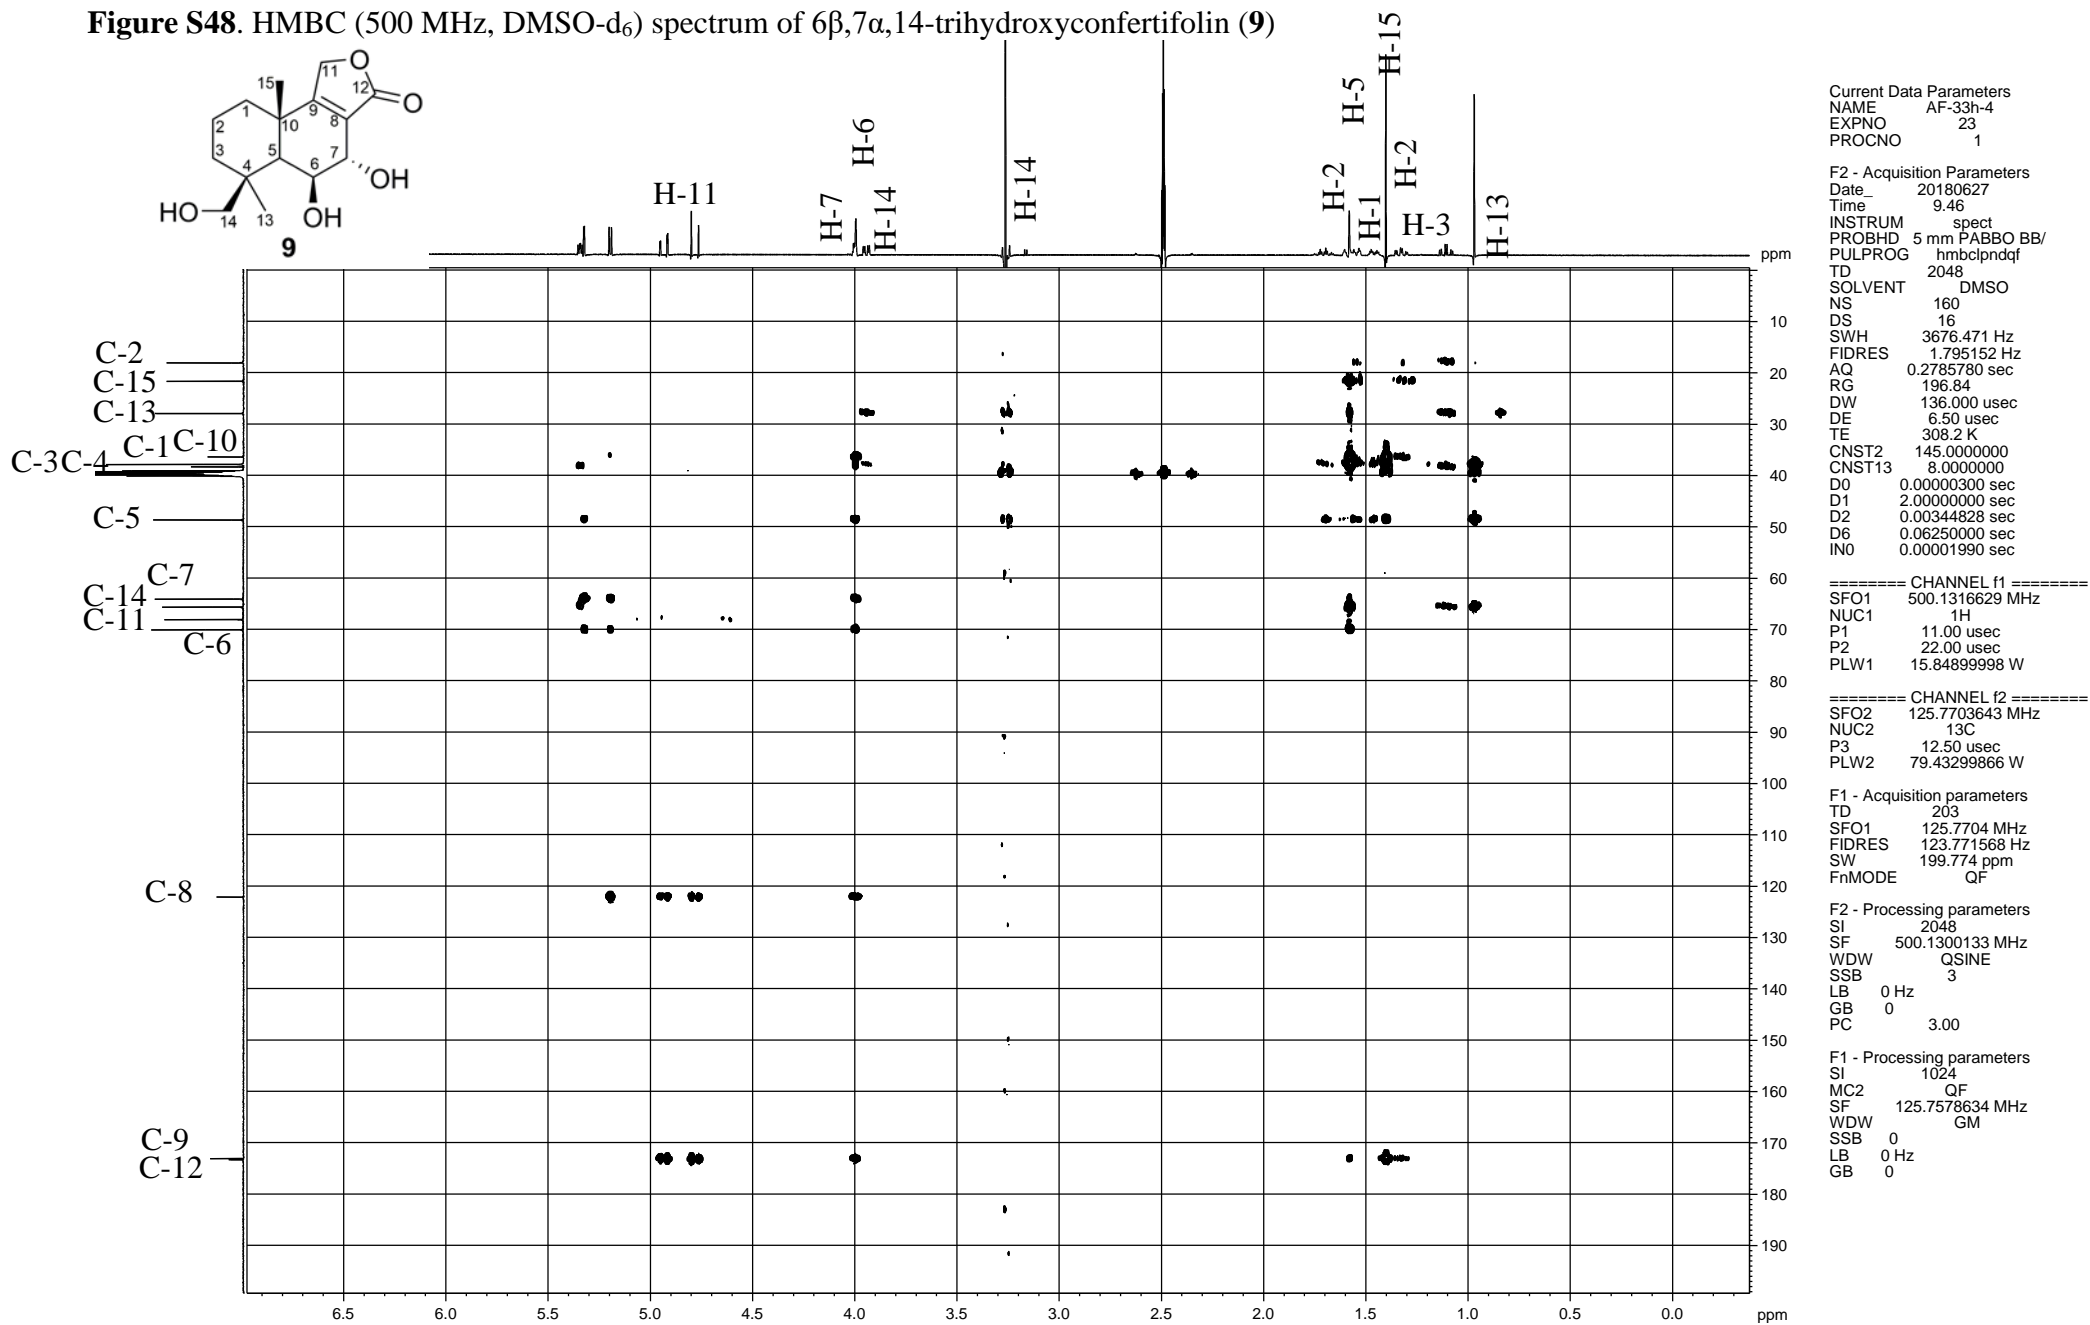

**Figure S49.** ROESY (700 MHz, DMSO-d<sub>6</sub>) spectrum of 6 $\beta$ ,7 $\alpha$ ,14-trihydroxyconfertifolin (**9**)

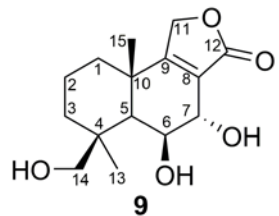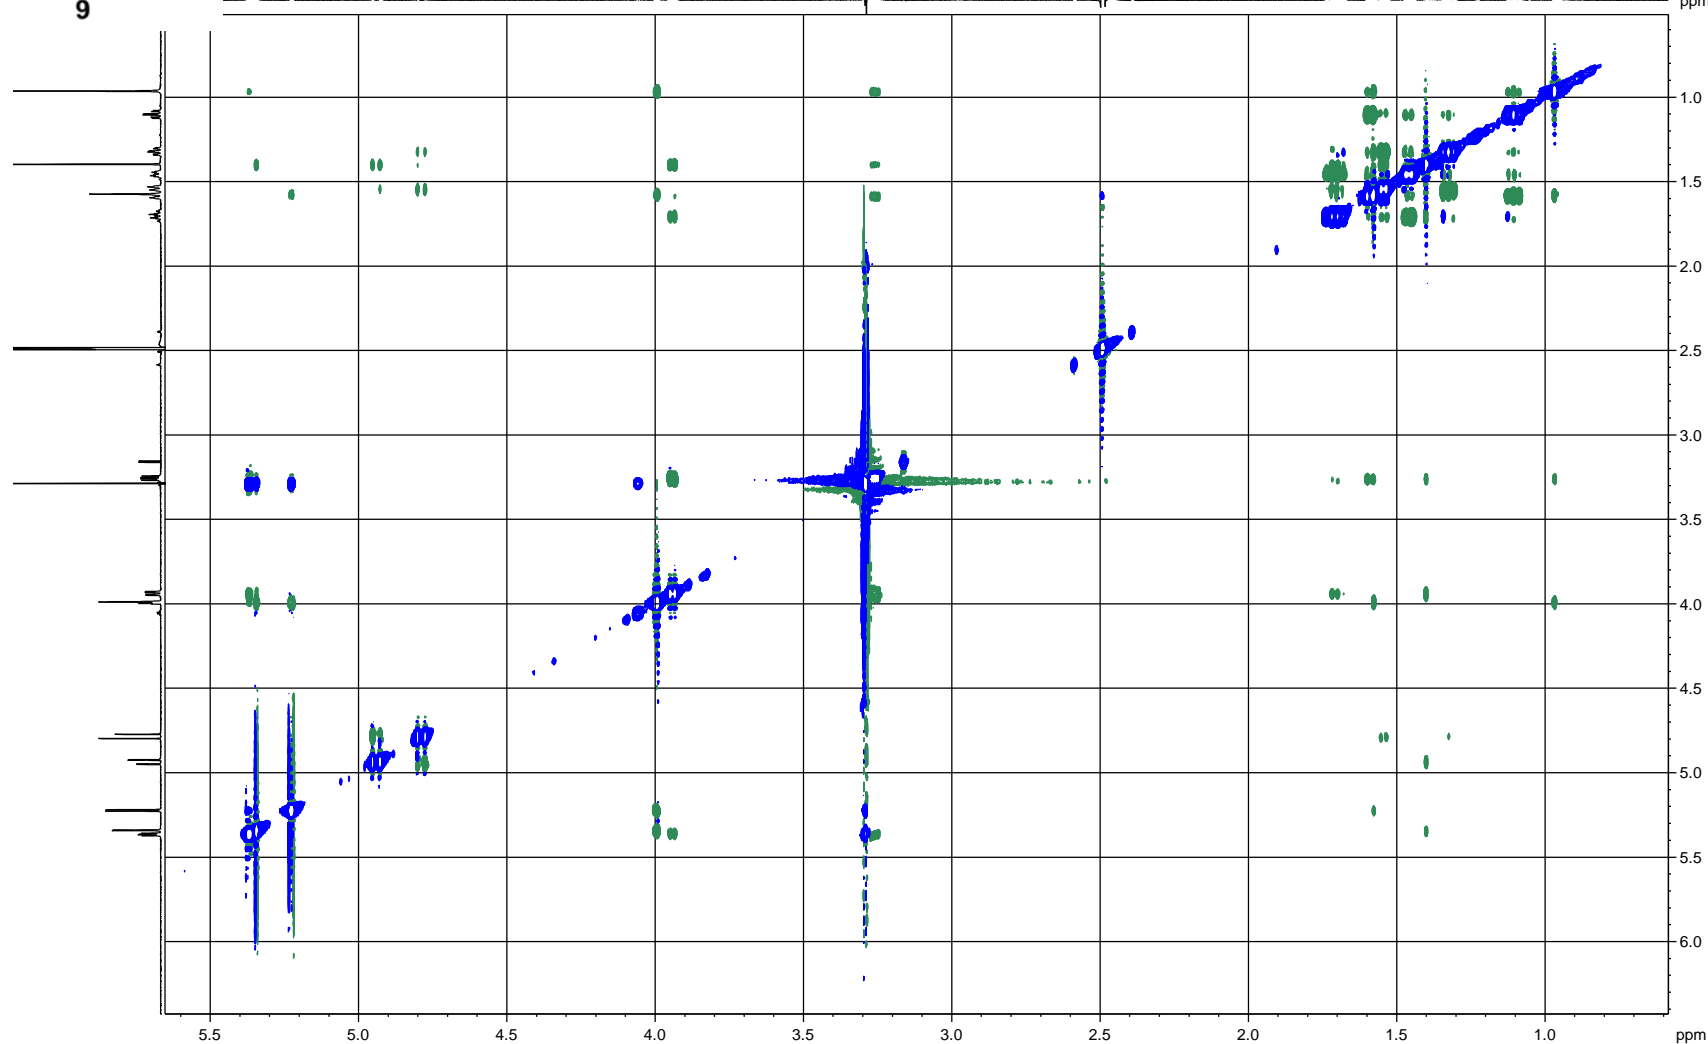

Current Data Parameters  
 NAME AF-33h-4new  
 EXPNO 23  
 PROCNO 1

F2 - Acquisition Parameters  
 Date\_ 20180529  
 Time 23:59  
 INSTRUM spect  
 PROBHD 5 mm PATXO 31P  
 PULPROG roesyph.2  
 TD 2048  
 SOLVENT DMSO  
 NS 48  
 DS 16  
 SWH 5030.181 Hz  
 FIDRES 2.456143 Hz  
 AQ 0.2036212 sec  
 RG 1.12  
 DW 99.400 usec  
 DE 6.50 usec  
 TE 302.7 K  
 D0 0.0008623 sec  
 D1 2.0000000 sec  
 D12 0.0002000 sec  
 IN0 0.00019880 sec  
 L4 613  
 P15 270000.00 usec

===== CHANNEL f1 =====  
 NUC1 1H  
 P1 14.40 usec  
 P25 220.00 usec  
 PL1 0 dB  
 PL27 17.66 dB  
 PL1W 23.41078186 W  
 PL27W 0.40125081 W  
 SFO1 700.0023824 MHz

F1 - Acquisition parameters  
 TD 256  
 SFO1 700.0024 MHz  
 FIDRES 19.649145 Hz  
 SW 7.186 ppm  
 FnMODE TPPI

F2 - Processing parameters  
 SI 2048  
 SF 700.000067 MHz  
 WDW SINE  
 SSB 2  
 LB 0 Hz  
 GB 0  
 PC 4.00

F1 - Processing parameters  
 SI 512  
 MC2 TPPI  
 SF 700.000026 MHz  
 WDW  
 SSB 2  
 LB 0 Hz  
 GB 0

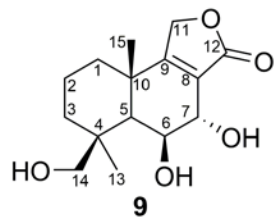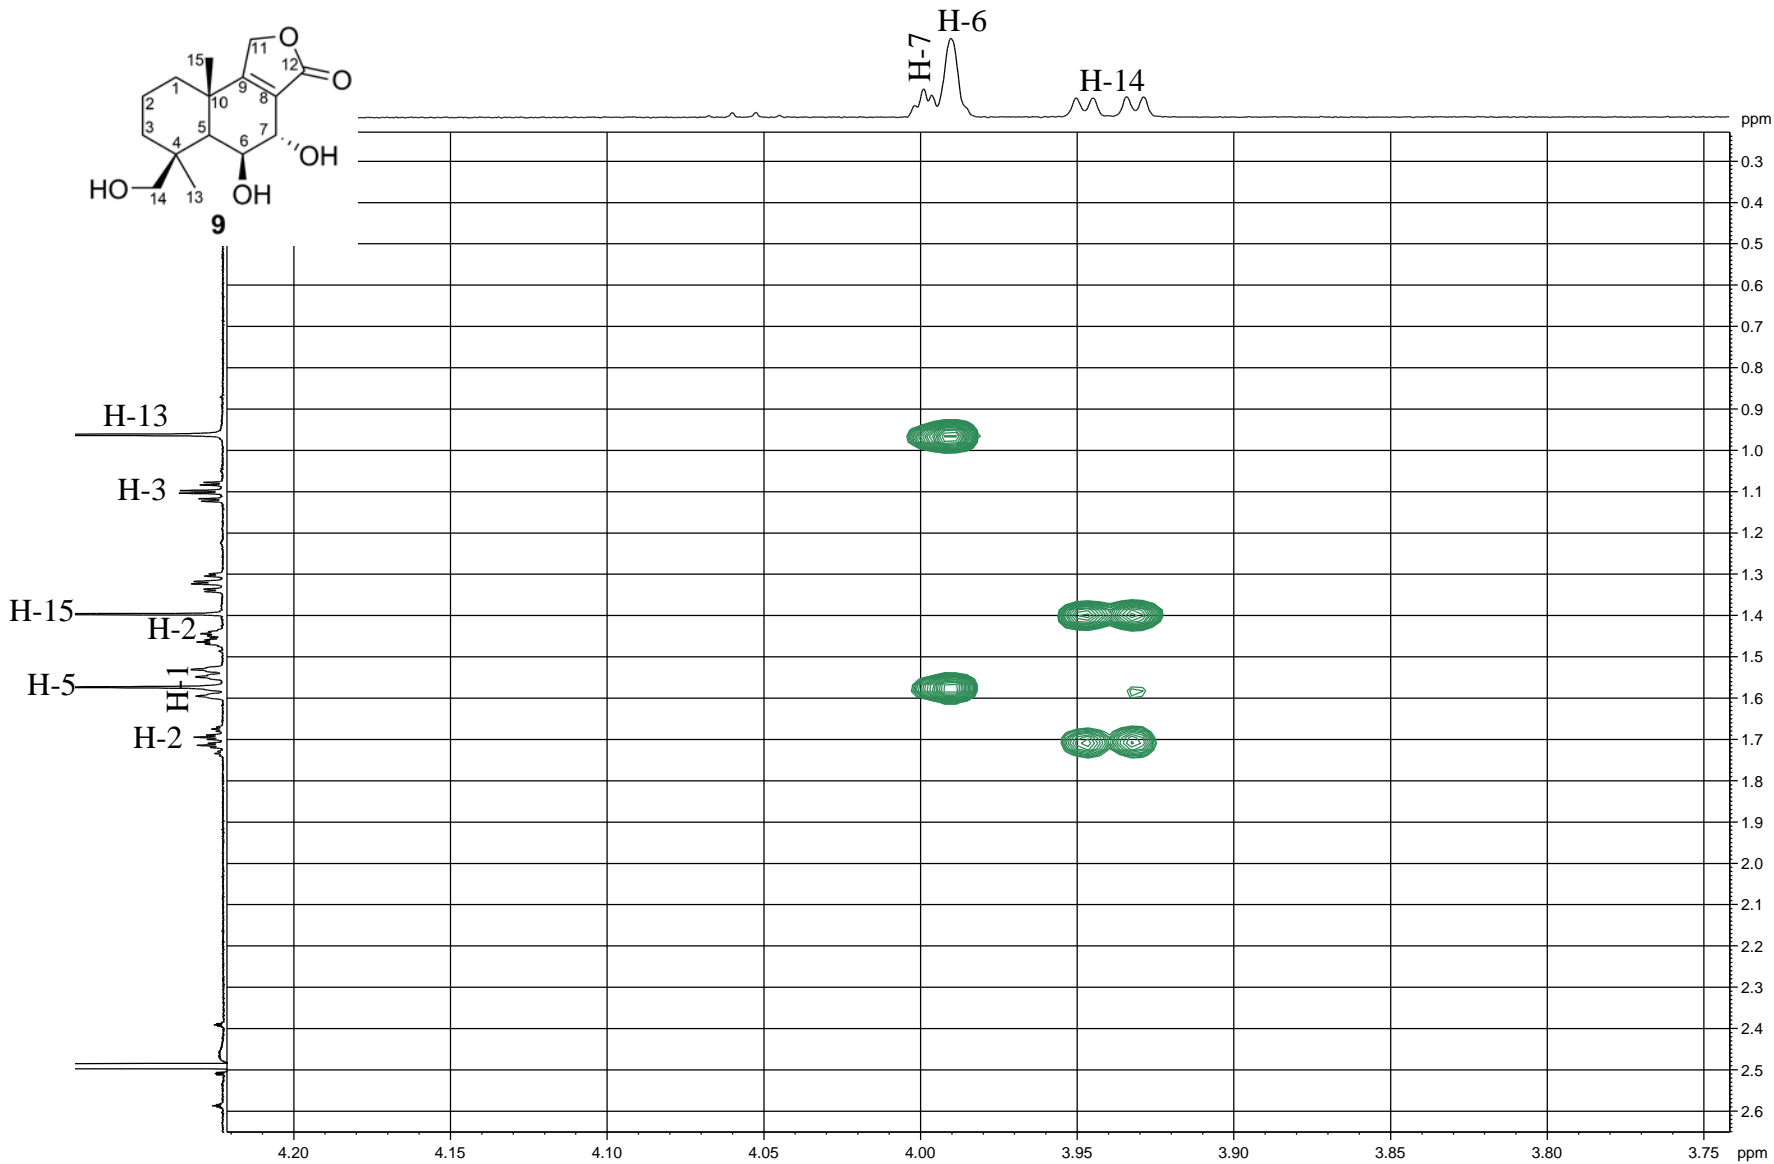

Current Data Parameters  
 NAME AF-33h-4new  
 EXPNO 23  
 PROCNO 1

F2 - Acquisition Parameters  
 Date\_ 20180529  
 Time 23.59  
 INSTRUM spect  
 PROBHD 5 mm PATXO 31P  
 PULPROG roesyph.2  
 TD 2048  
 SOLVENT DMSO  
 NS 48  
 DS 16  
 SWH 5030.181 Hz  
 FIDRES 2.456143 Hz  
 AQ 0.2036212 sec  
 RG 1.12  
 DW 99.400 usec  
 DE 6.50 usec  
 TE 302.7 K  
 D0 0.00008623 sec  
 D1 2.00000000 sec  
 D12 0.00002000 sec  
 IN0 0.00019880 sec  
 L4 613  
 P15 270000.00 usec

===== CHANNEL f1 =====  
 NUC1 1H  
 P1 14.40 usec  
 P25 220.00 usec  
 PL1 0 dB  
 PL27 17.66 dB  
 PL1W 23.41078186 W  
 PL27W 0.40125081 W  
 SFO1 700.0023824 MHz

F1 - Acquisition parameters  
 TD 256  
 SFO1 700.0024 MHz  
 FIDRES 19.649145 Hz  
 SW 7.186 ppm  
 FnMODE TPPI

F2 - Processing parameters  
 SI 2048  
 SF 700.0000067 MHz  
 WDW SINE  
 SSB 2  
 LB 0 Hz  
 GB 0  
 PC 4.00

F1 - Processing parameters  
 SI 512  
 MC2 TPPI  
 SF 700.0000026 MHz  
 WDW  
 SSB 2  
 LB 0 Hz  
 GB 0



Figure S50. <sup>1</sup>H NMR (500 MHz, MeOD) spectrum of 6β,7α,14-trihydroxyconfertifolin (9)

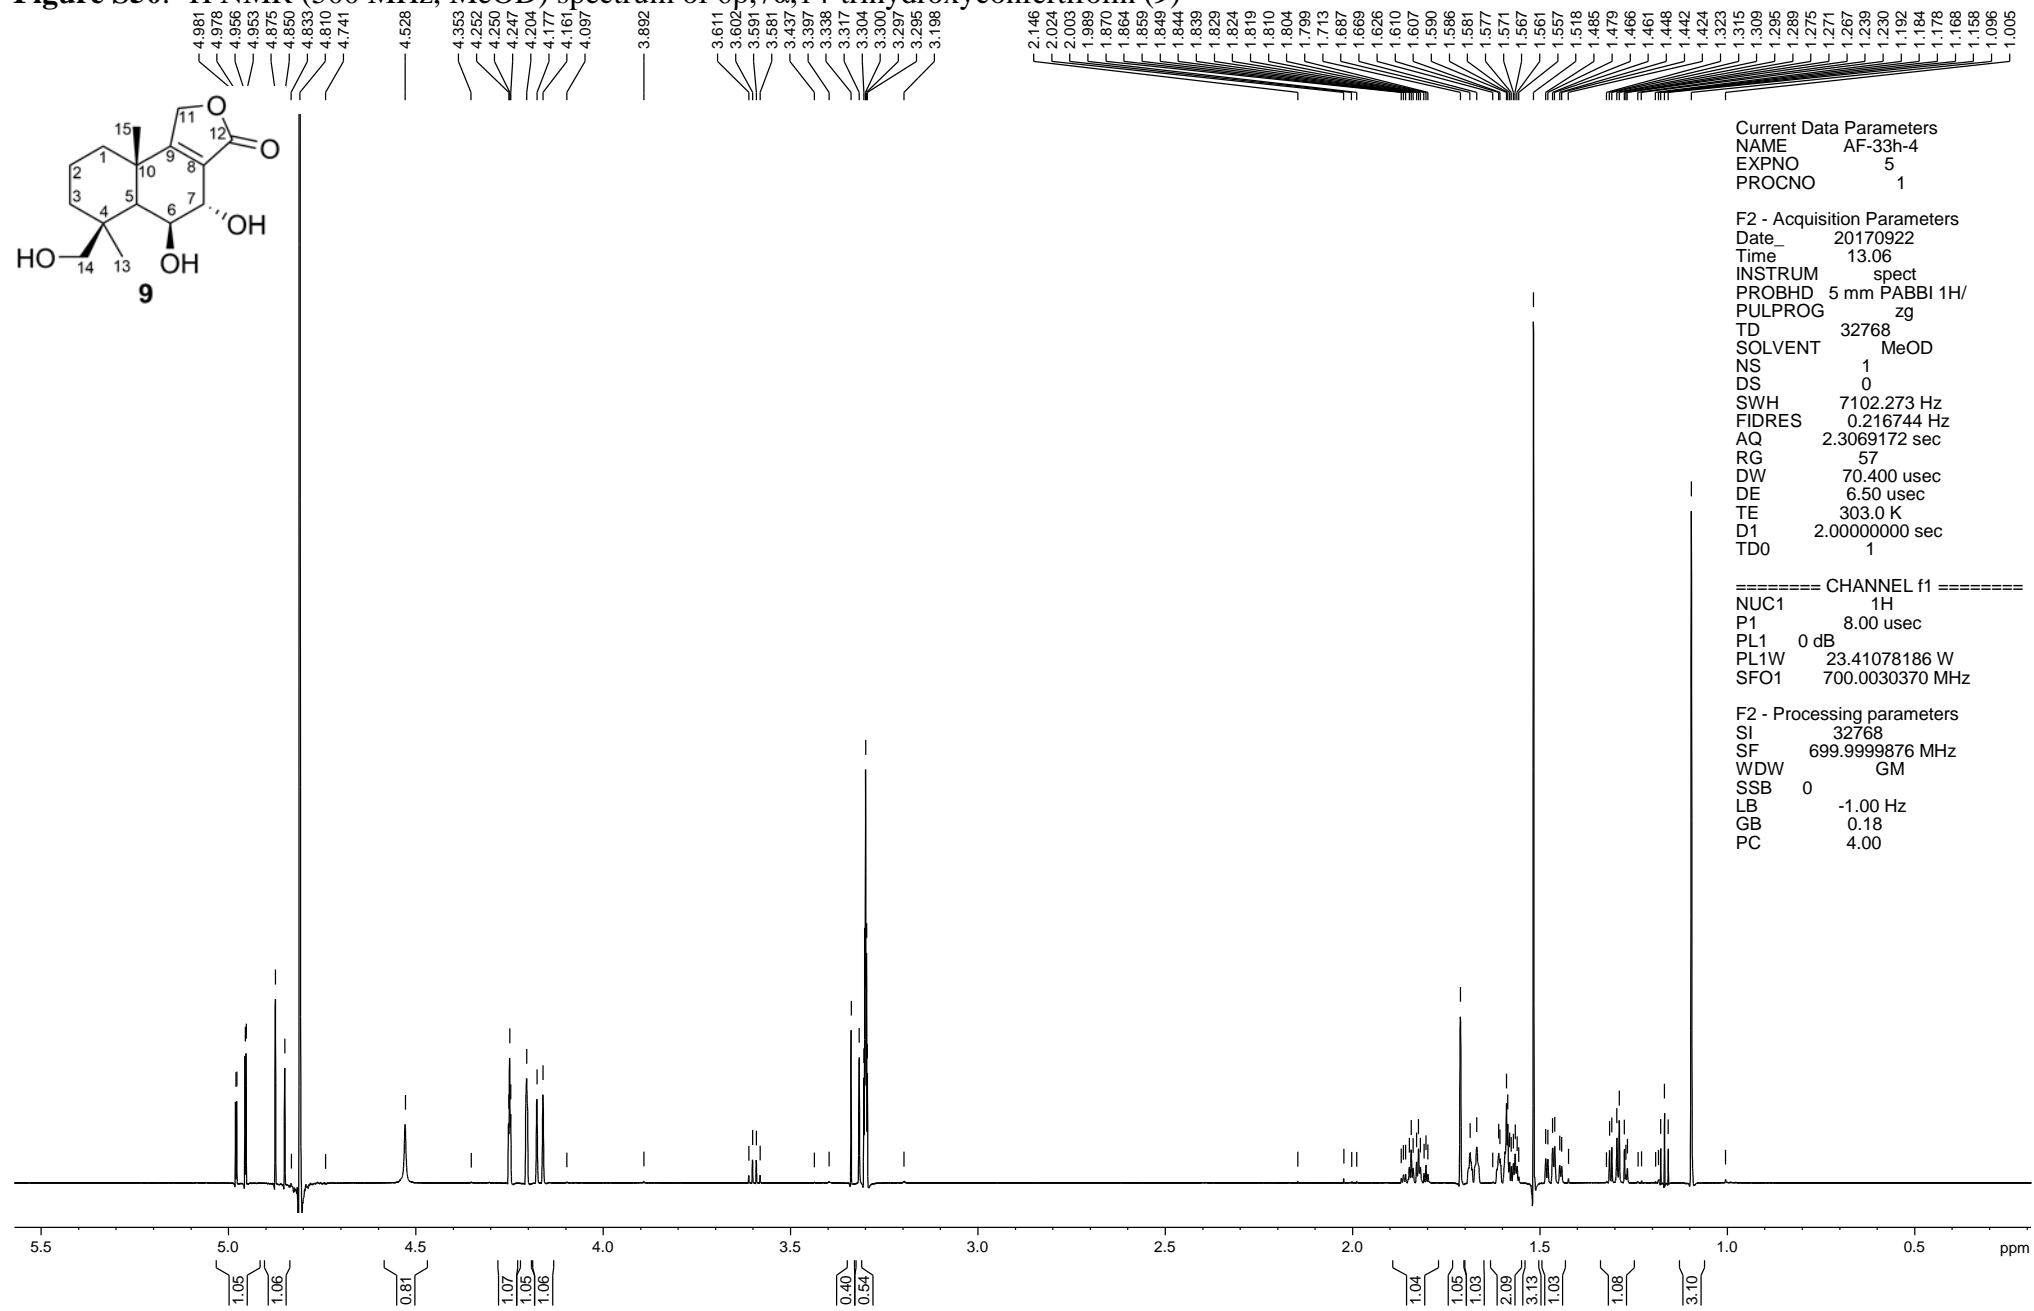

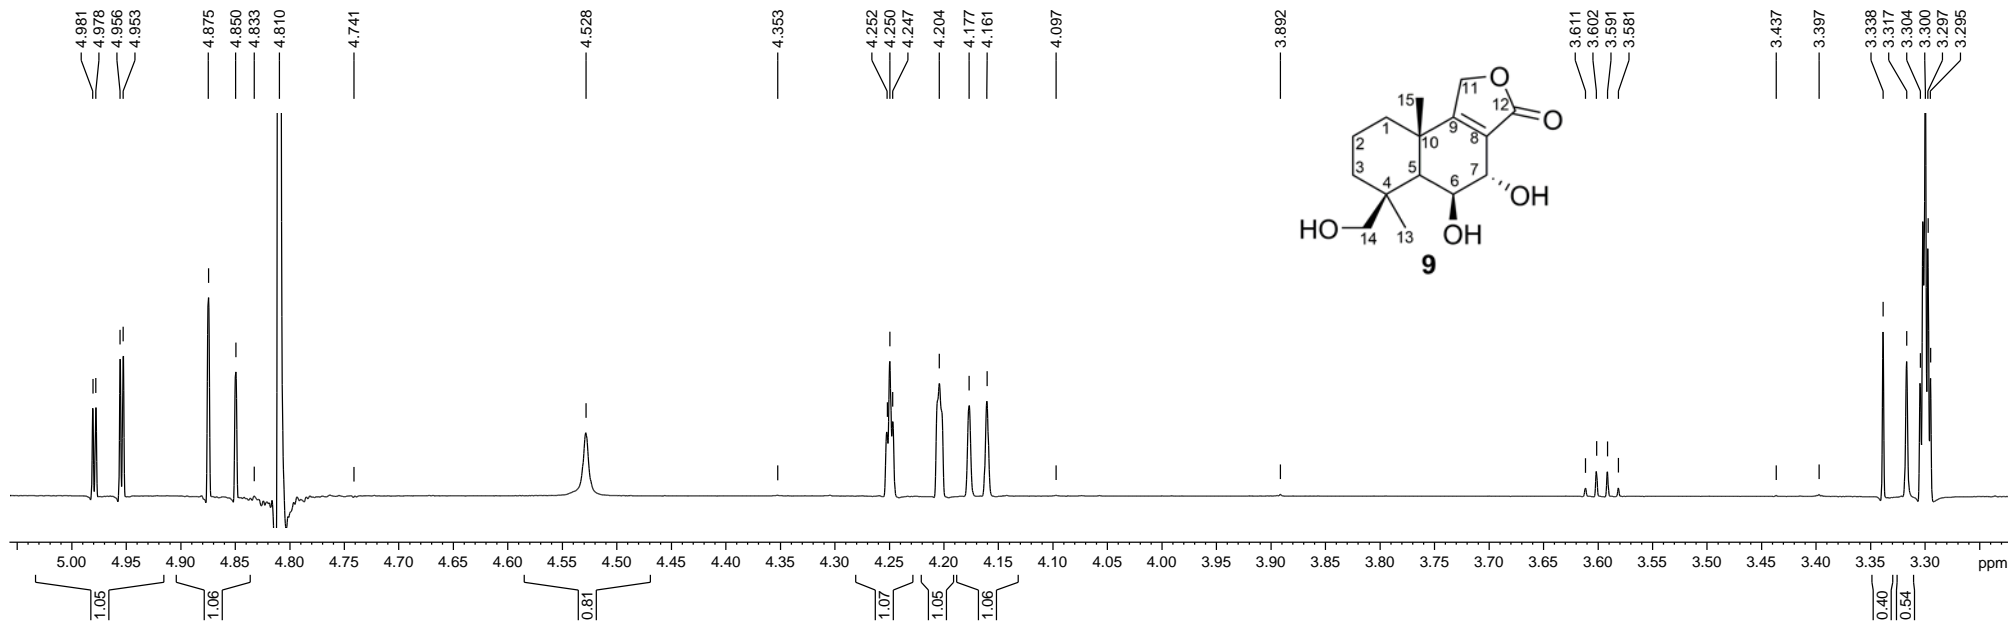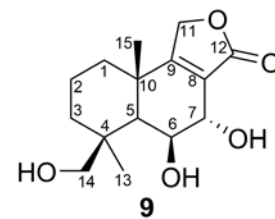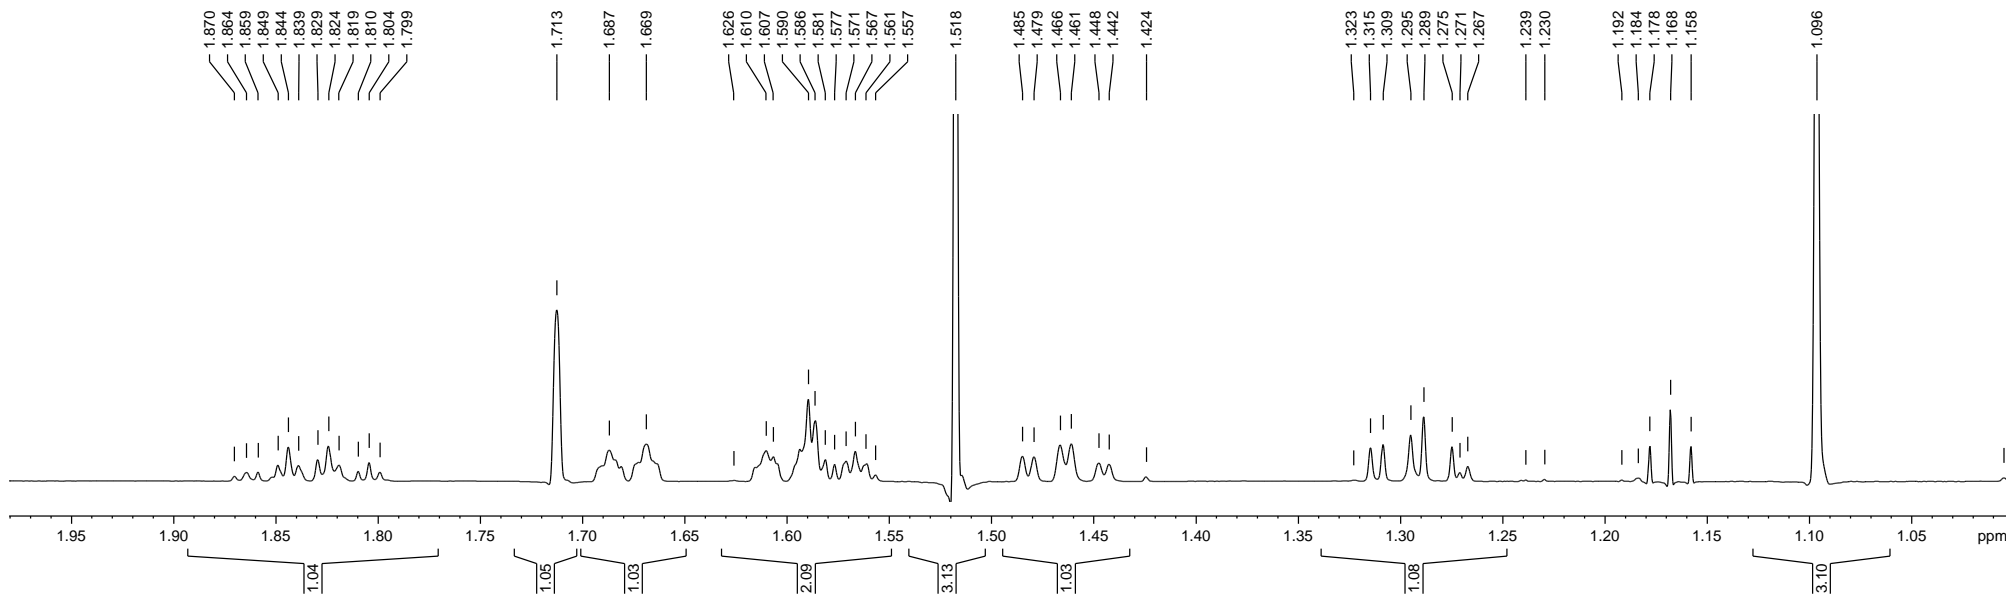

**Figure S51.**  $^{13}\text{C}$  NMR (125 MHz, MeOD) spectrum of 6 $\beta$ ,7 $\alpha$ ,14-trihydroxyconfertifolin (**9**)

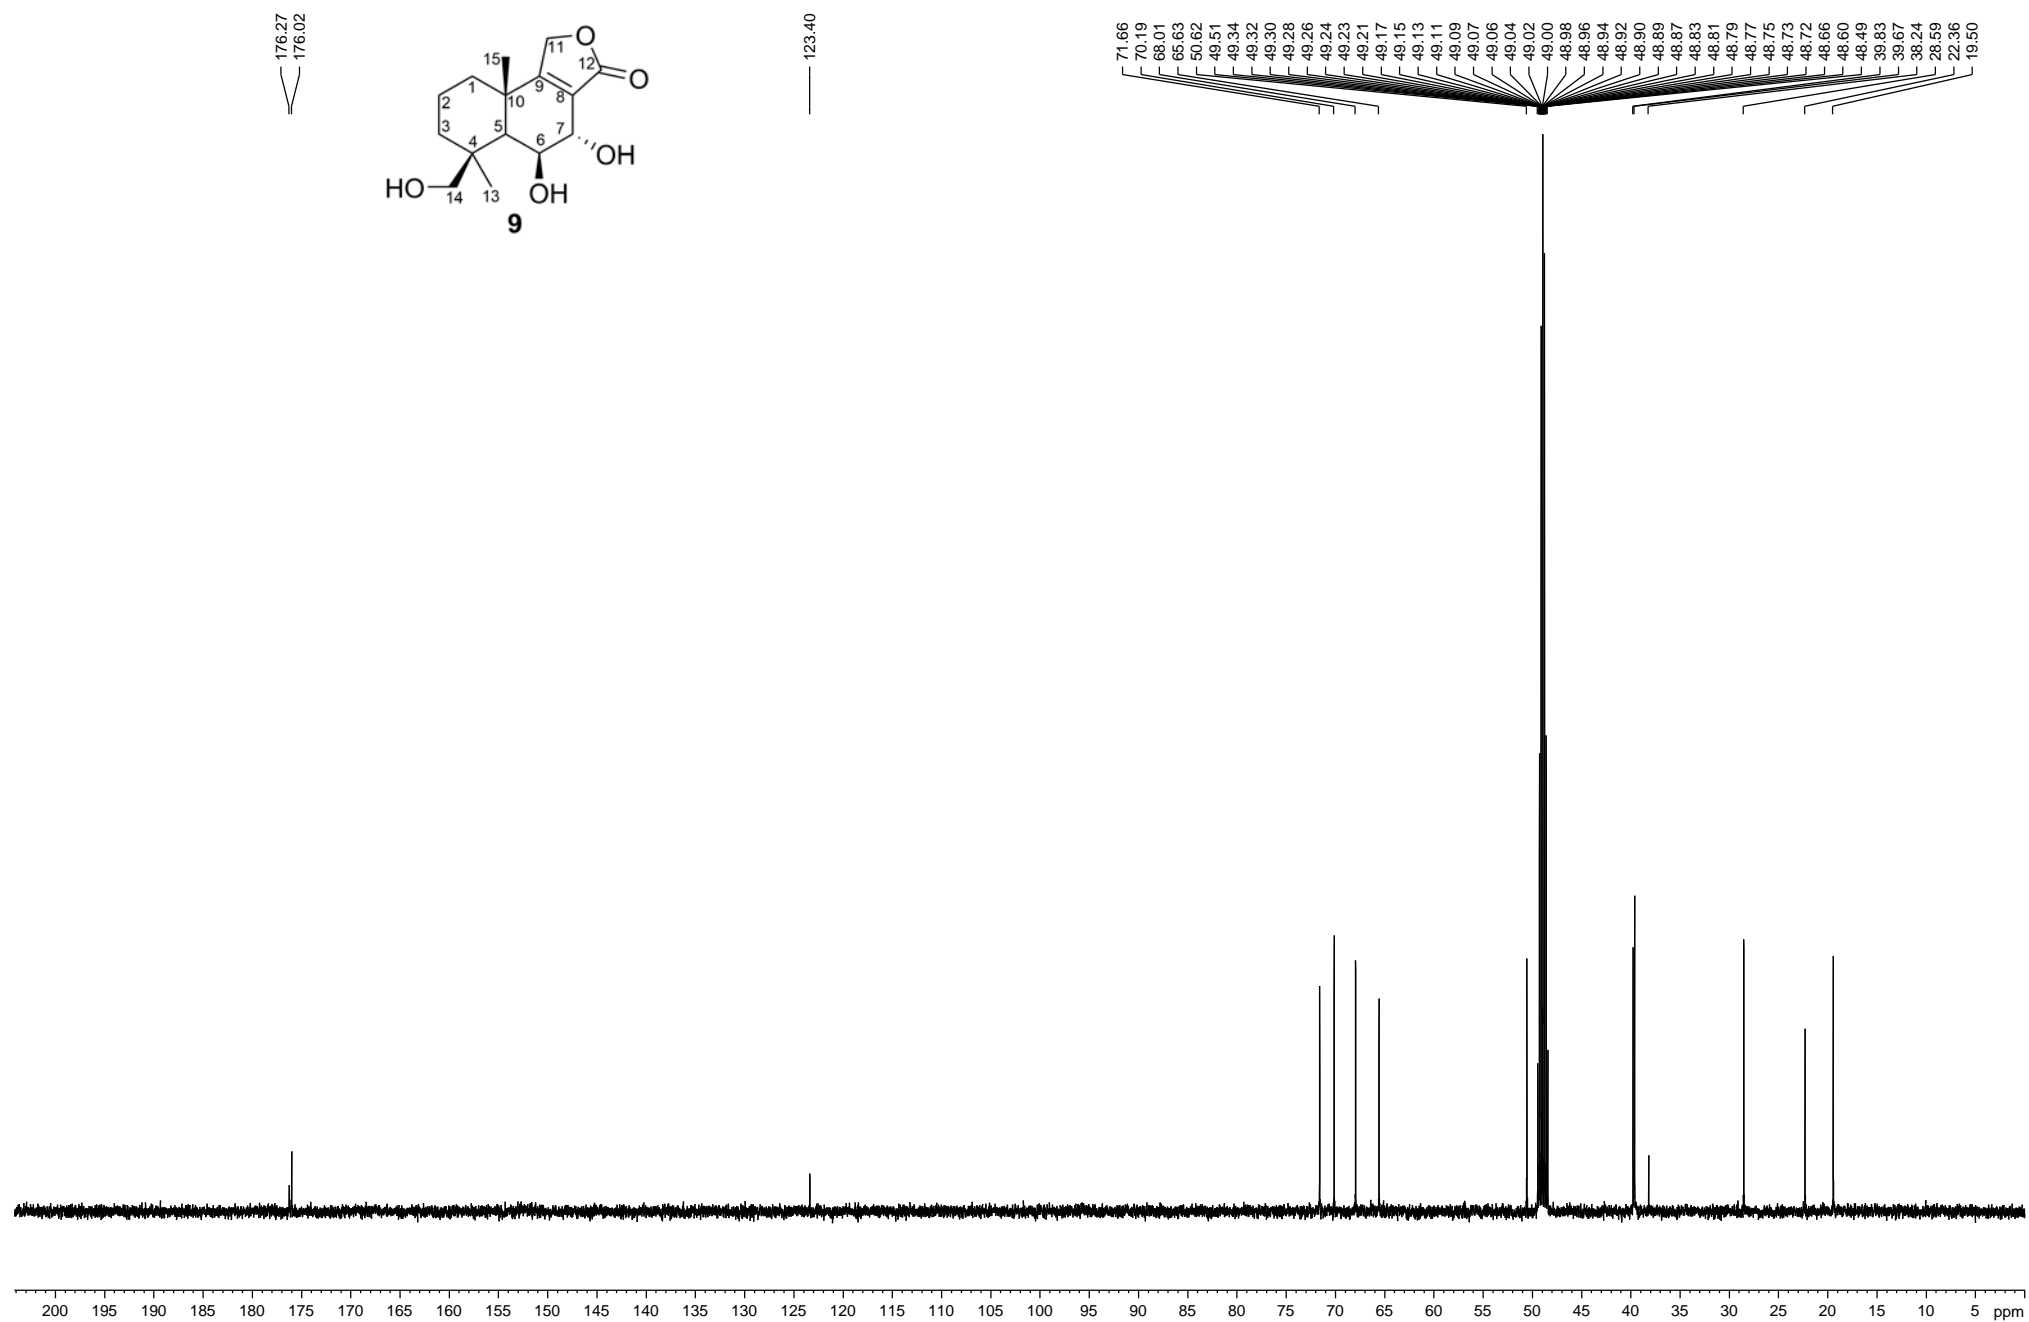

**Figure S52.** DEPT-135 (125 MHz, MeOD) spectrum of 6 $\beta$ ,7 $\alpha$ ,14-trihydroxyconfertifolin (**9**)

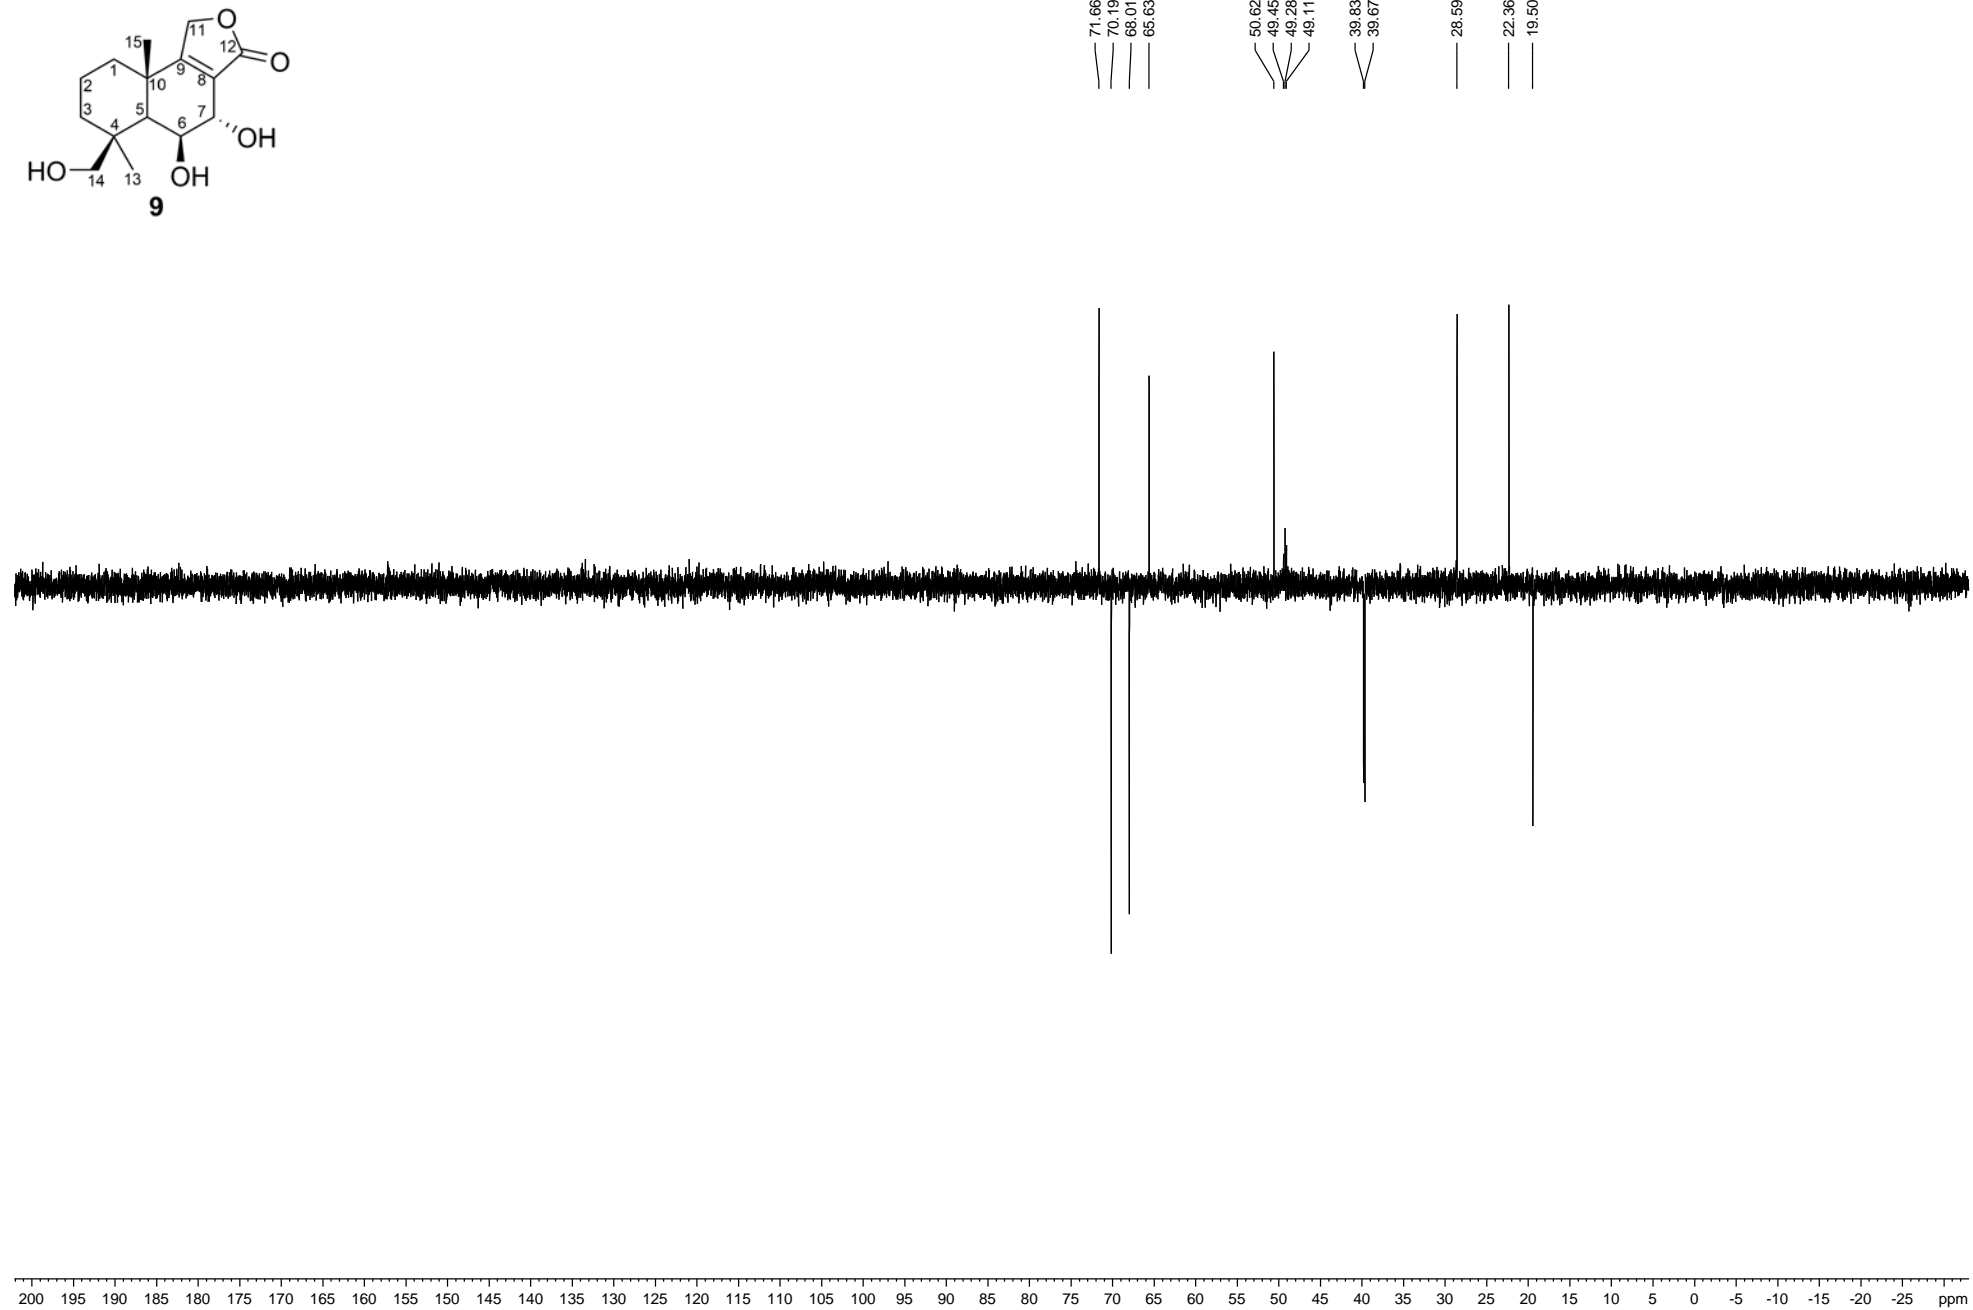

Figure S53. <sup>1</sup>H-<sup>1</sup>H COSY (700 MHz, MeOD) spectrum of 6β,7α,14-trihydroxyconfertifolin (9)

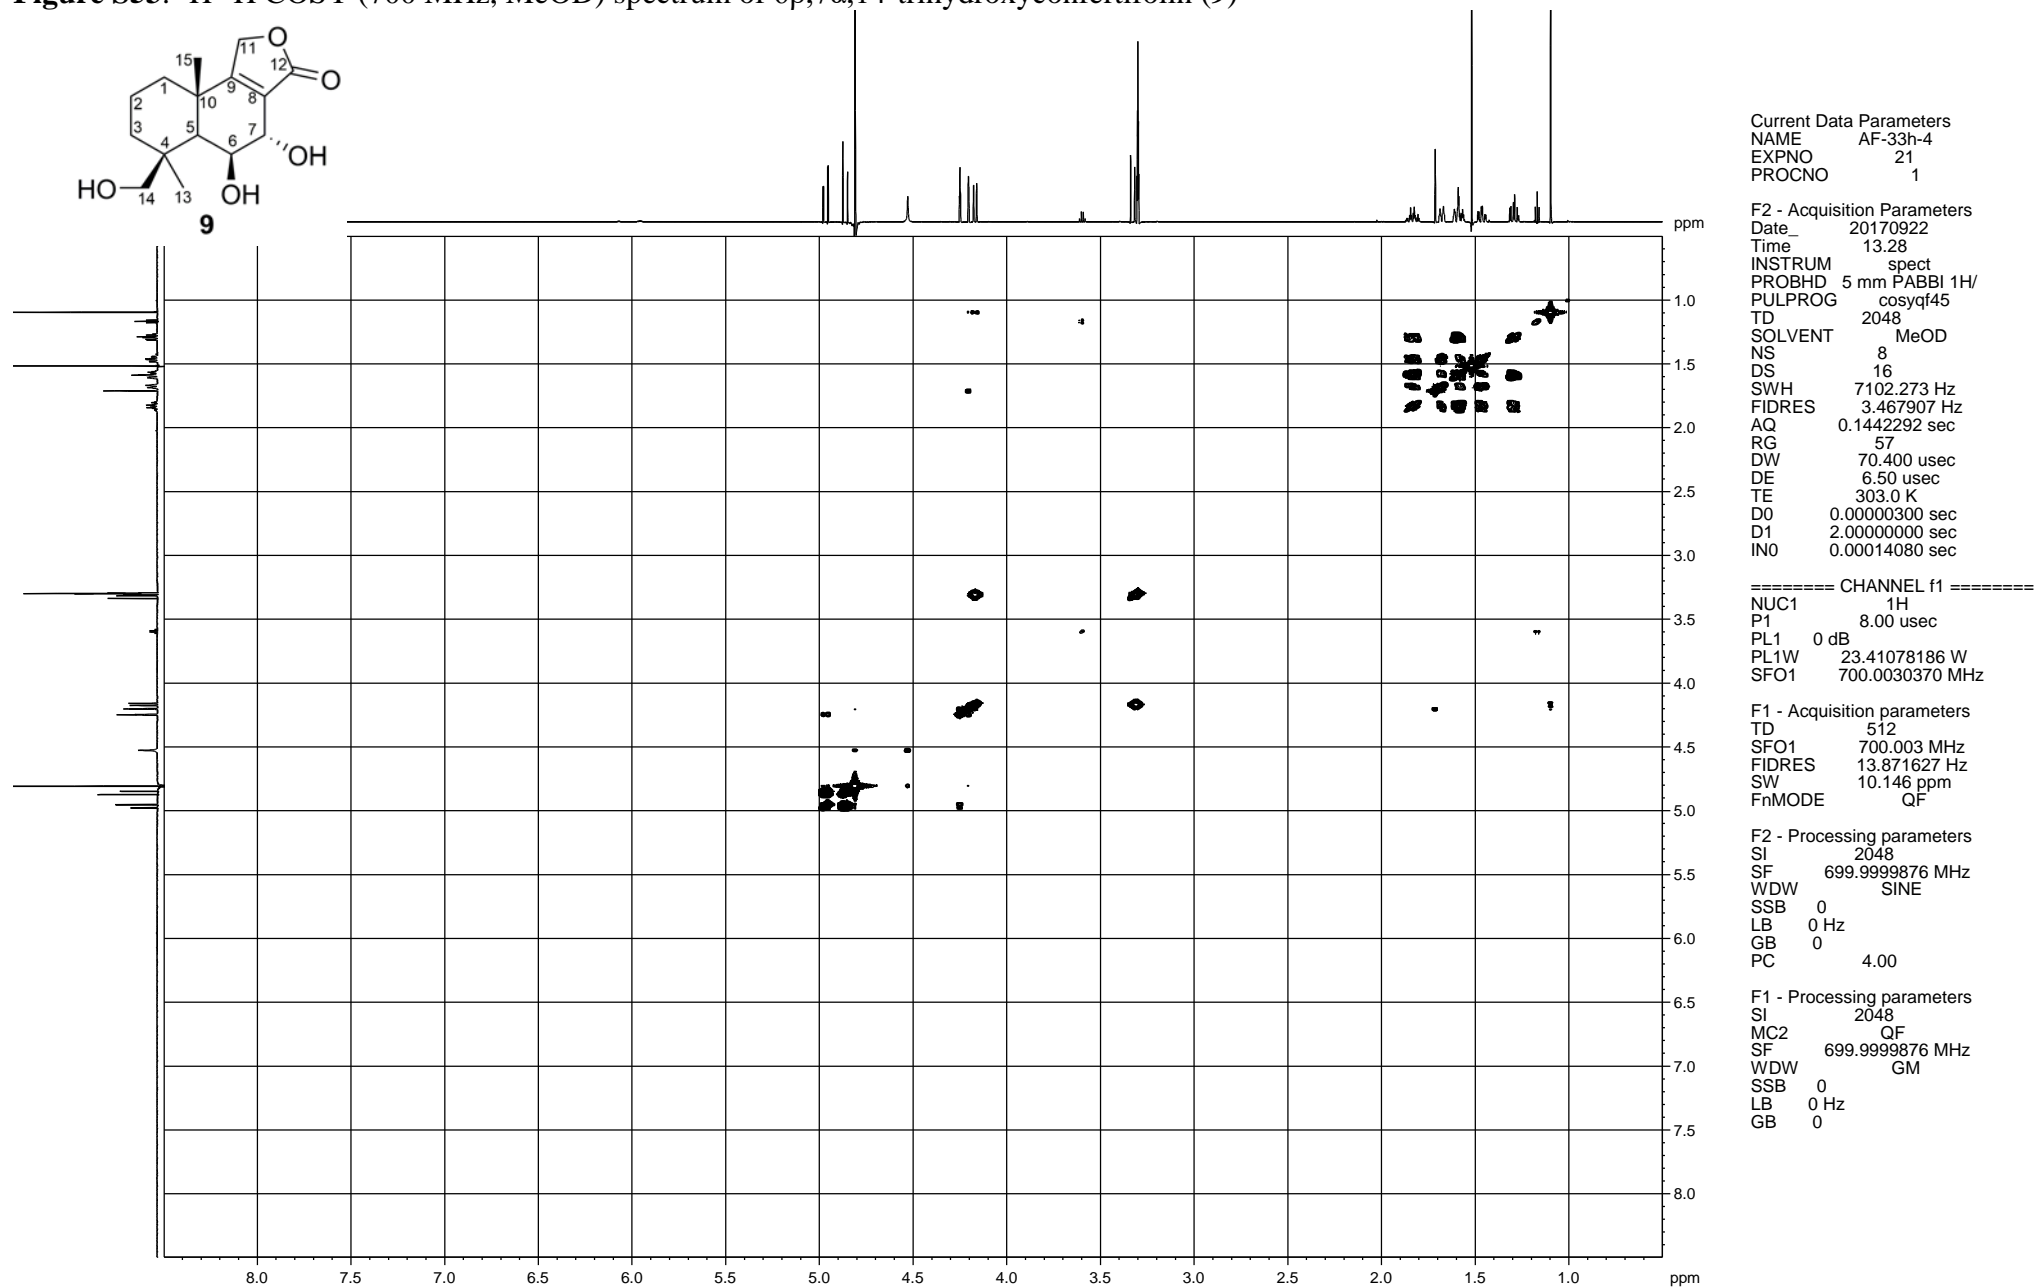

**Figure S54.** ECD spectrum of 6 $\beta$ ,7 $\alpha$ ,14-trihydroxyconfertifolin (**9**) in methanol

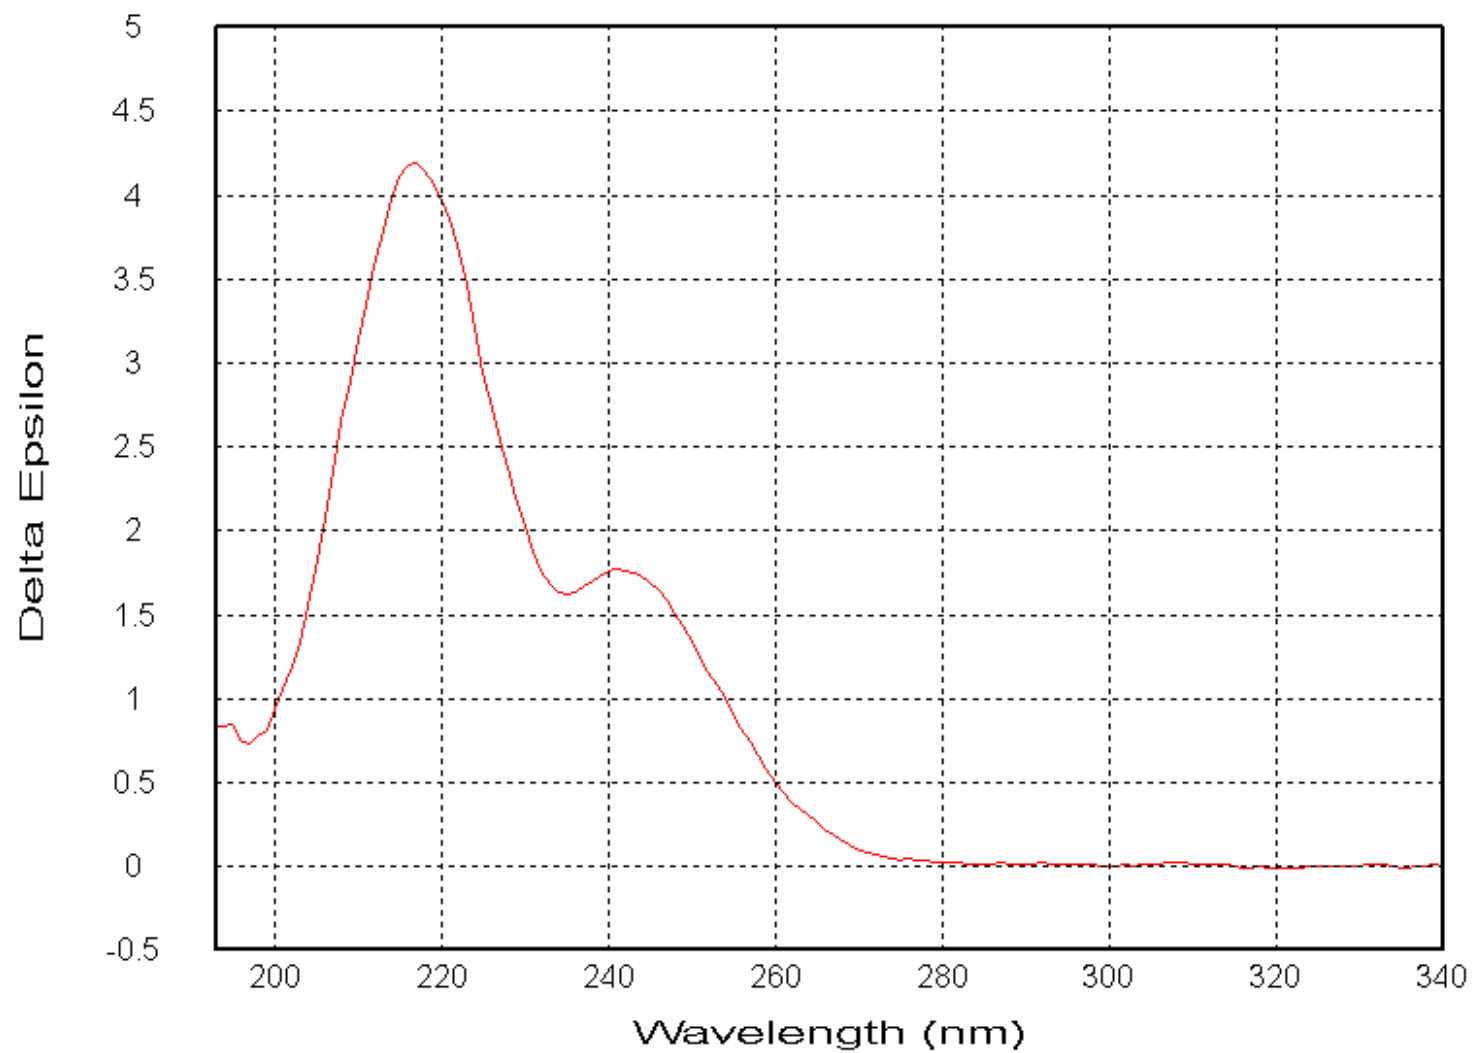

**Figure S55.** <sup>1</sup>H NMR (700 MHz, acetone-d<sub>6</sub>) spectrum of 7α,14-dihydroxy-6β-p-nitrobenzoylconfertifolin (**10**)

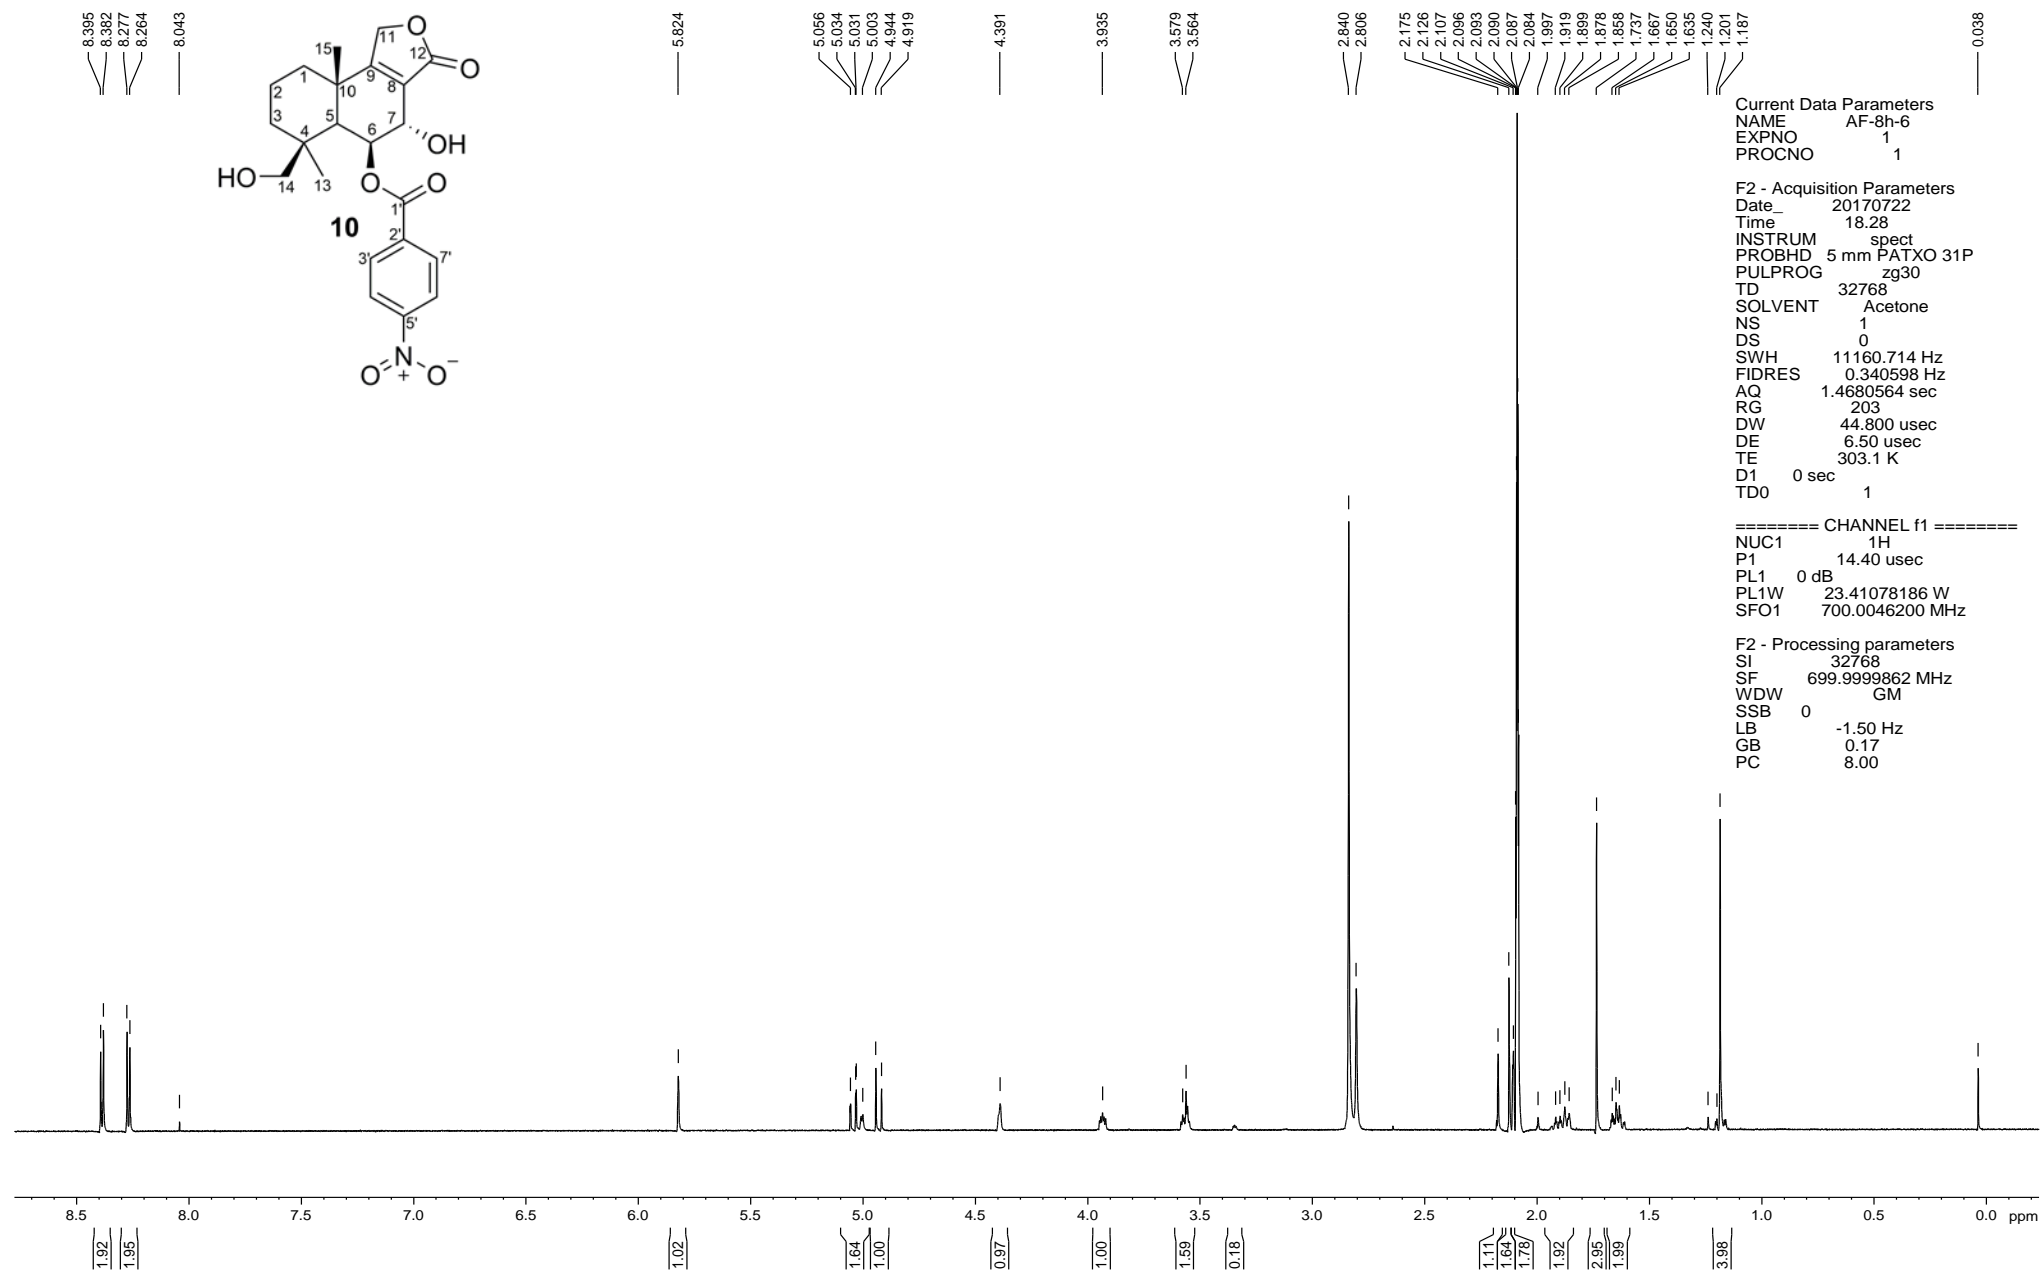

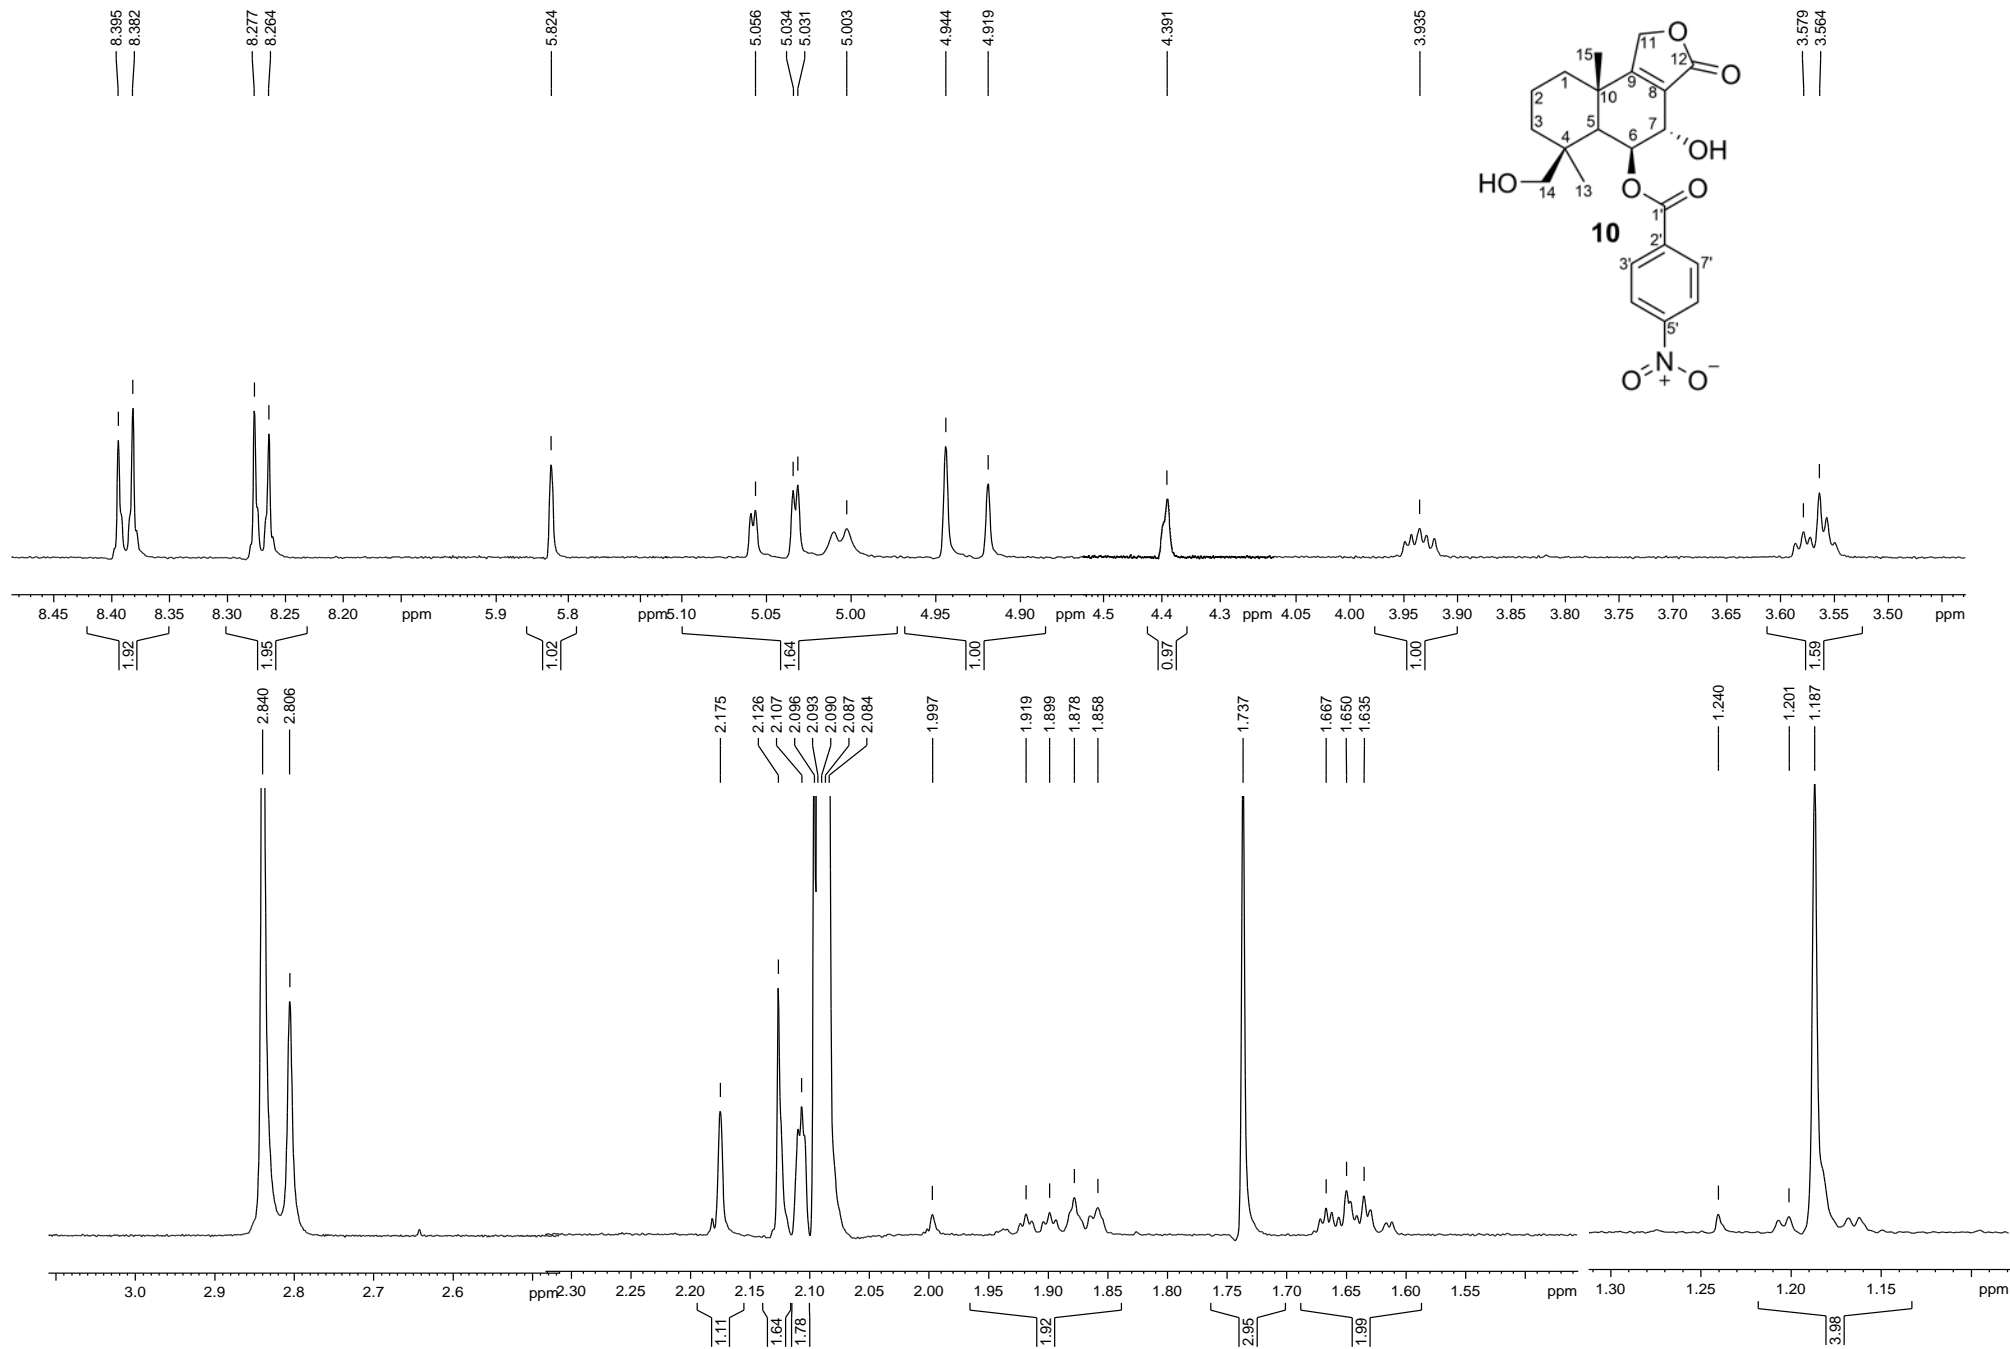



**Figure S56.**  $^{13}\text{C}$  NMR (175 MHz, acetone- $d_6$ ) spectrum of 7 $\alpha$ ,14-dihydroxy-6 $\beta$ -p-nitrobenzoylconfertifolin (**10**)

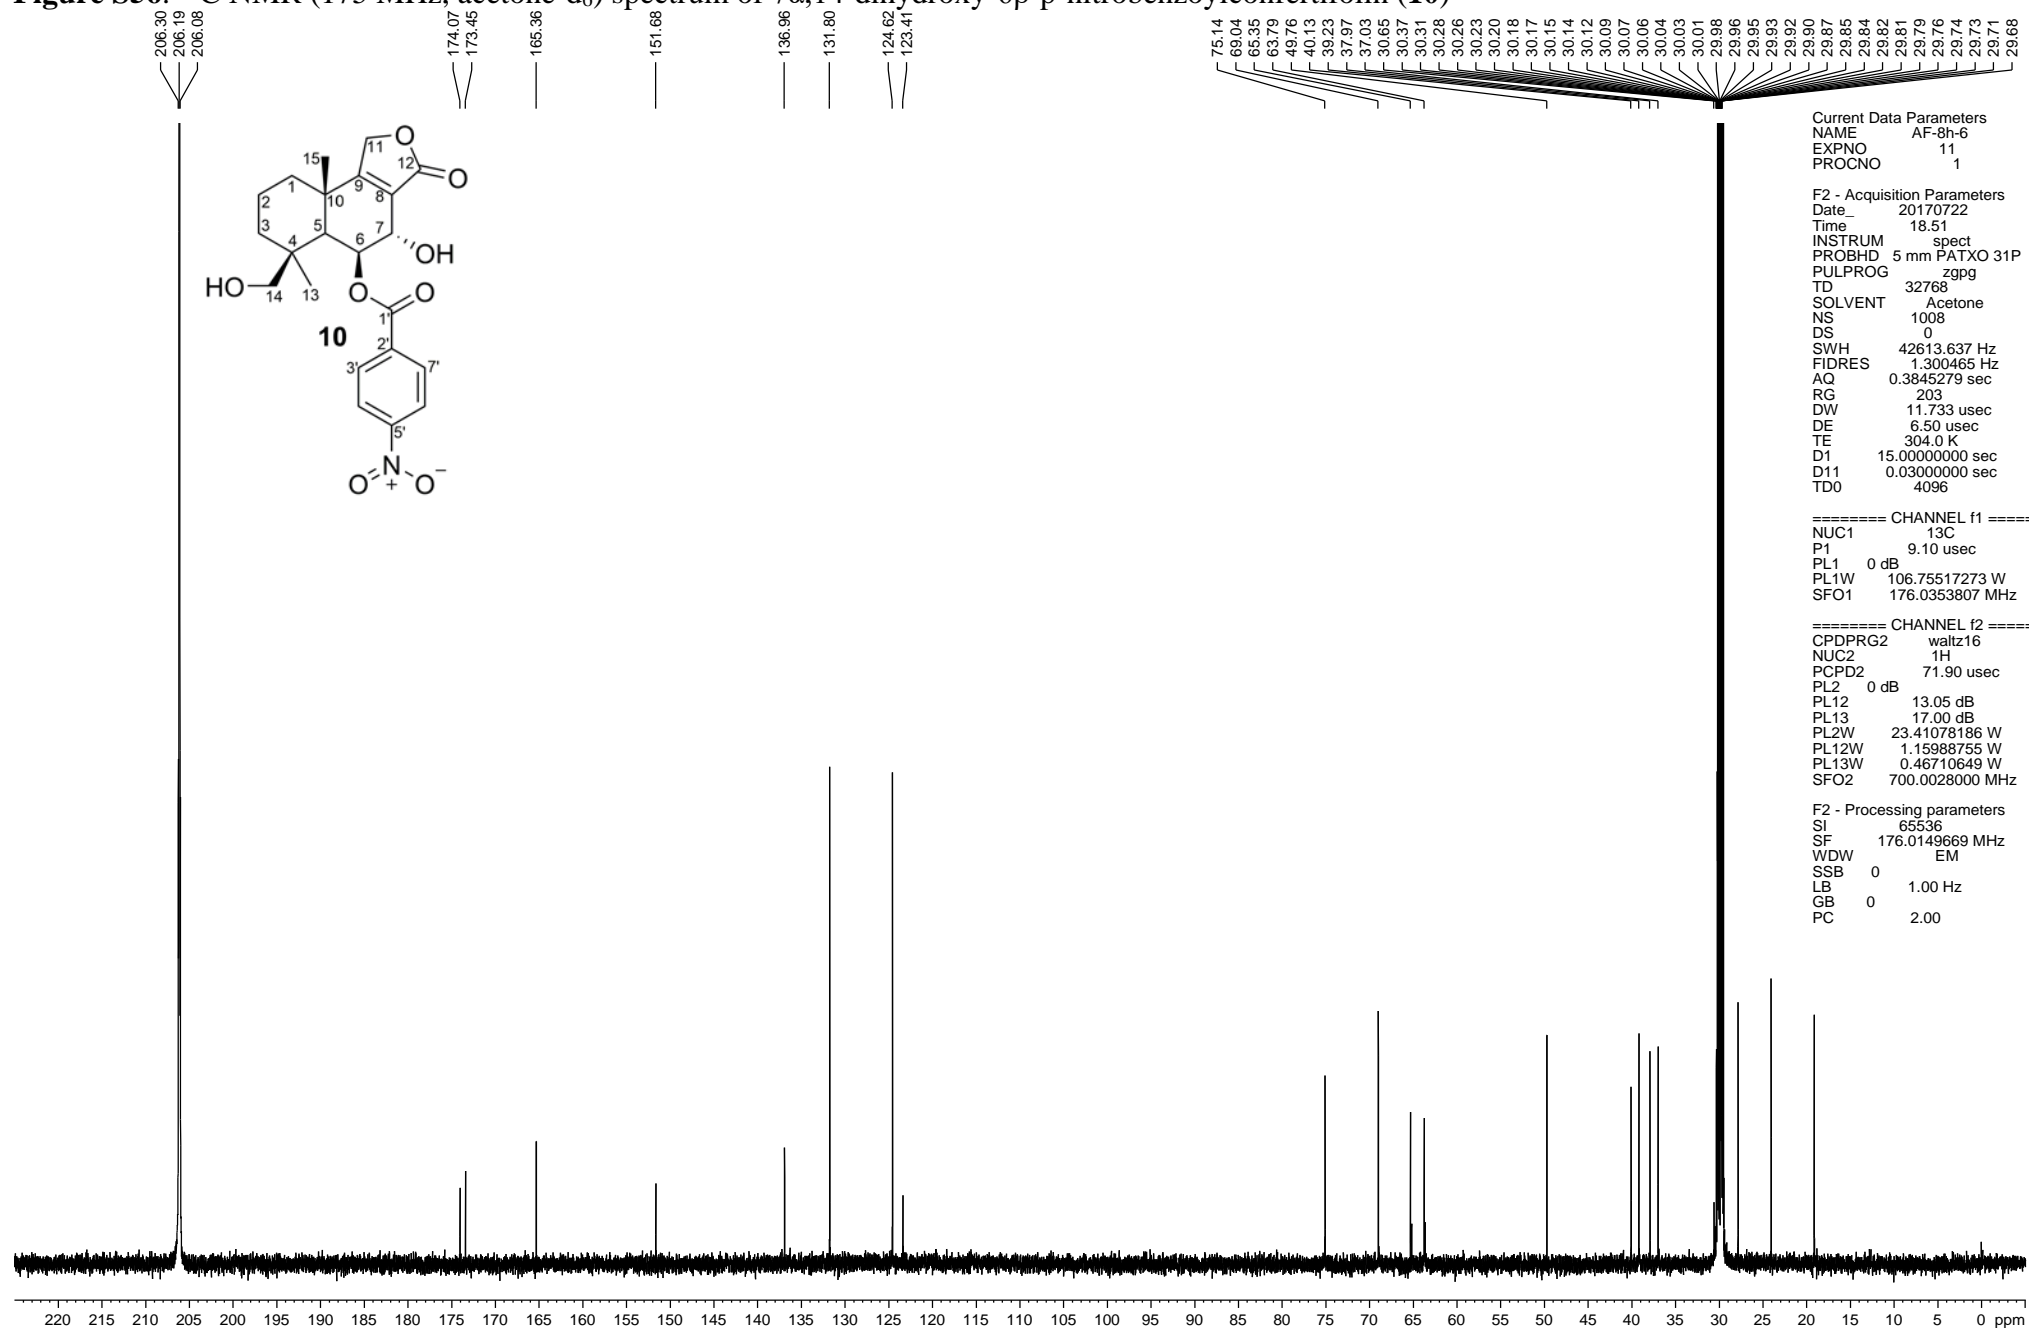

Figure S57. ECD spectrum of 7 $\alpha$ ,14-dihydroxy-6 $\beta$ -p-nitrobenzoylconfertifolin (**10**) in methanol

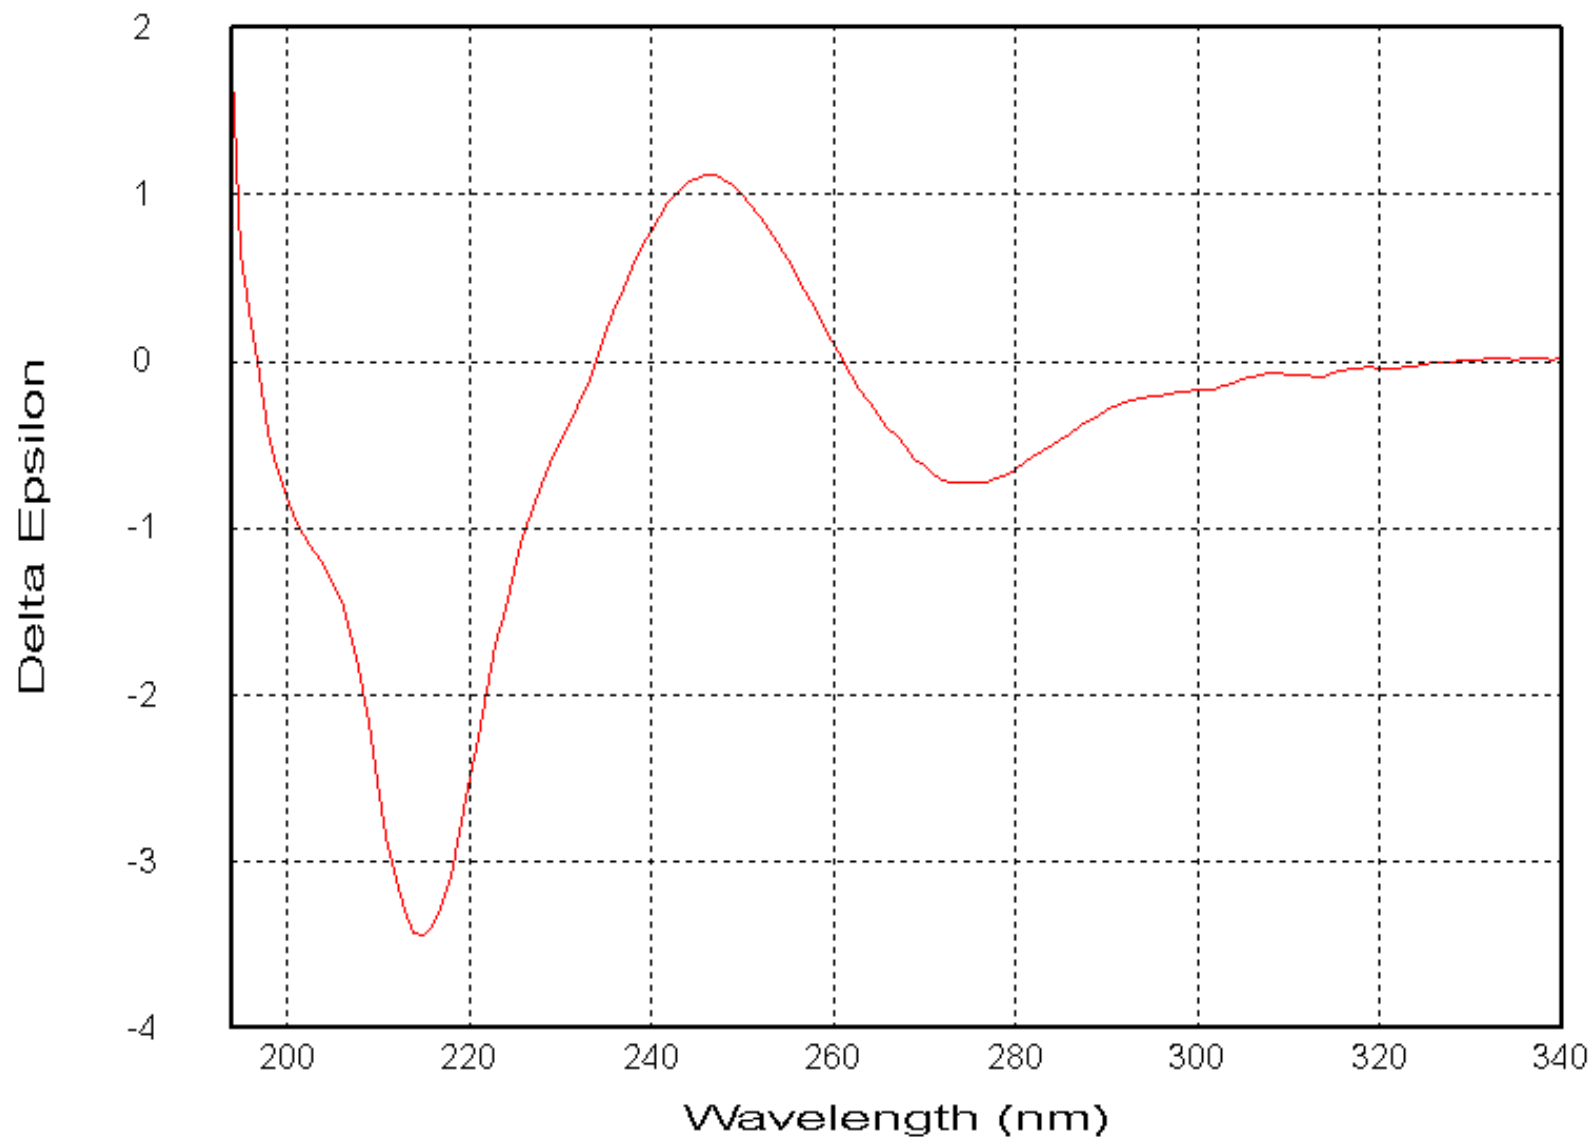

Supplement: marinedrugs-17-00579-s001.pdf [file marinedrugs-17-00579-s001.pdf]
